# Supplementary material for: New o-substituted diphenylphosphinic amide ligands: synthesis, characterization and complexation with Zn2+, Cu2+ and Y3+
Source: Royal Society of Chemistry journal article supplement (doi:10.1039/c9nj02829c), 2019-01-01

## Appendix. Supporting Information

### **New o-substituted diphenylphosphinic amides ligands: synthesis, characterization and complexation with Zn<sup>2+</sup>, Cu<sup>2+</sup> and Y<sup>3+</sup>**

A. C. R. F. Medeiros,<sup>a,b</sup> M. M. Gouvêa,<sup>a,c</sup> T. V. Felipe,<sup>b</sup> F. F. C. Marques,<sup>a,c</sup> A. M. R. Bernardino,<sup>\*a,b</sup> F. López-Ortiz<sup>\*d</sup> and M. C. de Souza<sup>\*a,b</sup>

*<sup>a</sup>Programa de Pós-Graduação em Química, Instituto de Química, Universidade Federal Fluminense, Niterói 24020-141, Brasil*

*<sup>b</sup>Departamento de Química Orgânica, Instituto de Química, Universidade Federal Fluminense, Niterói 24020-141, Brasil*

*<sup>c</sup>Departamento de Química Analítica, Instituto de Química, Universidade Federal Fluminense, Niterói 24020-141, Brasil*

*<sup>d</sup>Área de Química Orgánica, Universidad de Almería, Ctra. Sacramento s/n, 04120 Almería, Spain*

**\*Corresponding Autor**

Tel No.: +55 021 26292230 and +34 950015478

E-author for correspondence: marcoscs@id.uff.br

## Contents

Structural characterization of compounds **1-13**

$^1\text{H}$ -,  $^{13}\text{C}$ - and  $^{31}\text{P}$ -NMR, IR and HRMS (ESI) spectra of the new compounds.

Complexation data

- 1)  $^1\text{H}$  NMR spectra of **11b** and **11b**/ $\text{ZnCl}_2$
- 2) IR spectra
- 3) Spectrofluorimetric spectra
- 4) Titration curves

## Structural characterization of compounds 1-13

1

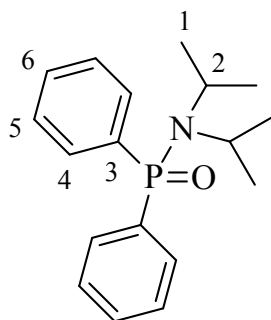

White solid. Yield: 80%. Empirical formula:  $C_{18}H_{24}NOP$ . MW: 301.36 g/mol. Mp: 115 °C.  $^1H$ -NMR (499.84 MHz,  $CDCl_3$ , ppm):  $\delta$  1.15 (d, 12 H,  $^3J_{HH} = 6.8$  Hz, H-1) 3.39 (dhep, 2H,  $^3J_{HH} = 6.7$  Hz and  $^3J_{PH} = 5.9$  Hz, H-2), 7.32-7.44 (m, 6H, H-5, H-6), 7.73-7.81 (m, 4 H, H-4).  $^{31}P$ -NMR (202.34 MHz,  $CDCl_3$ , ppm):  $\delta$  30,44. IR: 2970  $cm^{-1}$  ( $\nu$ C-H), 1435 ( $\nu$ P-Ph), 1173 ( $\nu$ P=O), 1021 ( $\nu$ P N-C).

2

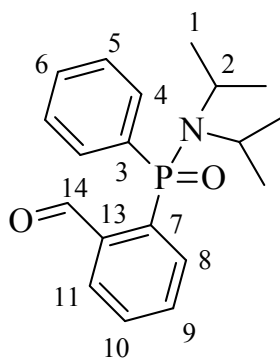

White solid. Yield: 88%. Empirical formula:  $C_{19}H_{24}NO_2P$ . MW: 329.37 g/mol. Mp = 116-117 °C.  $^1H$ -NMR (299,95 MHz,  $CDCl_3$ , ppm):  $\delta$  1.31 and 1.22 (2d, 12H,  $^3J_{HH} = 6,0$  Hz, H-1), 3.48 (dhep, 2H,  $^3J_{HH} = 6.5$  Hz and  $^3J_{PH} = 7.5$  Hz, H-2), 7.54 to 7.44 (m, 3H), 7.70 to 7.58 (m, 3H), 7.76-7.72 (m, 2H, H-4), 8.11 to 8.09 (m, 1H, H-8), 10.95 (s, 1H,

H-13).  $^{31}\text{P}$ -NMR (202.34 MHz,  $\text{CDCl}_3$ , ppm):  $\delta$  32.49. IR: 2970  $\text{cm}^{-1}$  ( $\nu\text{C-H}$ ), 1689 ( $\nu\text{C=O}$ ), 1404 ( $\nu\text{P-Ph}$ ), 1190 ( $\nu\text{P=O}$ ), 984 ( $\nu\text{P N-C}$ ).

3

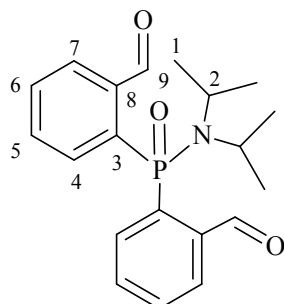

Yellow solid. Yield: 65%. Empirical formula:  $\text{C}_{20}\text{H}_{24}\text{NO}_3\text{P}$ . MW: 357.38 g/mol. Mp = 123  $^{\circ}\text{C}$ .  $^1\text{H}$ -NMR (299.95 MHz,  $\text{CDCl}_3$ , ppm):  $\delta$  1.24 (12H, H-1), 3.45 (2H, H-2), 7.64 to 7.37 (m, 6H, H-5, H-6, H-7), 8.10-8.05 (m, 2H, H-4), 10.94 (s, 2H, H-9).  $^{13}\text{C}$ -NMR (75.43 MHz,  $\text{CDCl}_3$ , ppm):  $\delta$  23.67 and 23.45 (C-1), 48.28 (C-2), 129.12 (C-4), 132.48 (C-5), 132.72 (C-6), 132.89 (C-7), 136.95 (d,  $^1J_{\text{PC}} = 116.9$  Hz, C-3), 139.84 (C-8), 192.49 (C-9).  $^{31}\text{P}$ -NMR (121.42 MHz,  $\text{CDCl}_3$ , ppm):  $\delta$  34.94. IR: 2969 ( $\nu\text{C-H}$ ), 1688 ( $\nu\text{C=O}$ ), 1398 ( $\nu\text{P-Ph}$ ), 1190 ( $\nu\text{P=O}$ ), 976 ( $\nu\text{P-N-C}$ ). HRMS (ESI)  $m/z$ , calc. for  $\text{C}_{20}\text{H}_{24}\text{NO}_3\text{P}$ : 358.1572  $[\text{M}+\text{H}]^+$ ; found: 358.1561.

5a

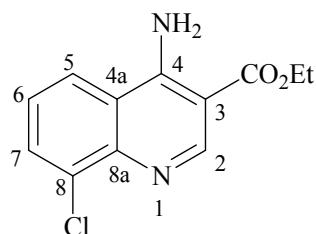

White solid. Yield: 65%. Empirical Formula:  $\text{C}_{12}\text{H}_{11}\text{ClN}_2\text{O}_2$ . MW: 250.68 g/mol. Mp = 291  $^{\circ}\text{C}$ .  $^1\text{H}$ -NMR (500 MHz,  $\text{DMSO-}d_6$ , ppm):  $\delta$  1.36 (t, 3H,  $^3J_{\text{HH}} = 7.1$  Hz,  $\text{CH}_3$ ), 4.35

(q, 2H,  $^3J_{\text{HH}} = 7.1$  Hz, CH<sub>2</sub>), 7.48 (t, 1H,  $^3J_{\text{HH}} = 7.1$  Hz, H-6), 7.91 (d, 1H,  $^3J_{\text{HH}} = 6.5$  Hz, H-7), 8.36 (d, 1H,  $^3J_{\text{HH}} = 8.4$  Hz, H-5), 8.42 (s, 2H, NH<sub>2</sub>), 8.98 (s, 1H, H-2). <sup>13</sup>C-NMR (125.69 MHz, DMSO-*d*<sub>6</sub>, ppm): δ 14.61 (CH<sub>3</sub>), 61.09 (CH<sub>2</sub>), 100.89 (C-3), 120.12 (C-4a), 122.77 (C-5), 125.84 (C-6), 132.22 (C-7), 132.98 (C-4), 145.16 (C-8), 152.30 (C-2), 154.73 (C-8a), 167.74 (C=O). IR: 3374 (νN-H), 3159 (νC-H), 1687 (νC=O), 753 (νC-Cl).

## 5b

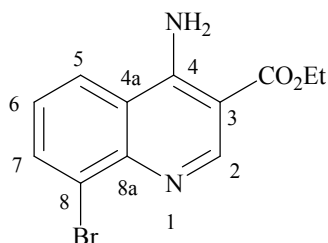

White solid. Yield: 62%. Empirical Formula: C<sub>12</sub>H<sub>11</sub>BrN<sub>2</sub>O<sub>2</sub>. MW: 295.13 g/mol. Mp = 265 °C. <sup>1</sup>H-NMR (500 MHz, DMSO-*d*<sub>6</sub>, ppm): δ 1.36 (t, 3H,  $^3J_{\text{HH}} = 7.1$  Hz, CH<sub>3</sub>), 4.36 (q, 2H,  $^3J_{\text{HH}} = 7.1$  Hz, CH<sub>2</sub>), 7.41 (t, 1H,  $^3J_{\text{HH}} = 7.1$  Hz, H-6), 8.10 (d, 1H,  $^3J_{\text{HH}} = 10.0$  Hz, H-7), 8.37 (s, 2H, NH<sub>2</sub>), 8.39 (m, 1H, H-5), 8.98 (s, 1H, H-2). <sup>13</sup>C-NMR (125.69 MHz, DMSO-*d*<sub>6</sub>, ppm): δ 14.46 (CH<sub>3</sub>), 62.34 (CH<sub>2</sub>), 101.13 (C-3), 101.37 (C-4), 119.23 (C-8), 125.08 (C-5), 128.05 (C-6), 138.16 (C-7), 148.24 (C-2), 165.83 (C=O). IR: 3368 (νN-H), 3139 (νC-H), 1688 (νC=O), 558 (νC-Br).

**5c**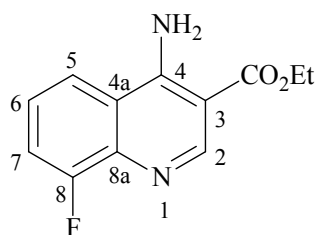

White solid. Yield: 70%. Empirical Formula:  $C_{12}H_{11}FN_2O_2$ . MW: 234.23 g/mol. Mp = 289 °C.  $^1H$ -NMR (300 MHz, DMSO- $d_6$ , ppm):  $\delta$  1.28 (t, 3H,  $^3J_{HH} = 7.1$  Hz,  $CH_3$ ), 4.22 (q, 2H,  $^3J_{HH} = 7.1$  Hz,  $CH_2$ ), 7.25 (1H, H-6), 7.37 (1H, H-7), 8.22 (m, 1H, H-5), 8.55 (s, 1H, H-2).  $^{13}C$ -NMR (75.43 MHz, DMSO- $d_6$ , ppm):  $\delta$  14.11 ( $CH_3$ ), 59.47 ( $CH_2$ ), 104.04 (C-6), 110.33 (C-4), 113.00 (C-7), 124.10 (C-8), 128.81 (C-5), 140.38 (C-8a), 145.19 (C-2), 162.27 (C-4a), 164.44 (C-3), 165.58 (C=O). IR: 3106 ( $\nu$ N-H), 2988 ( $\nu$ C-H), 1692 ( $\nu$ C=O), 1194 ( $\nu$ C-F).

**6a**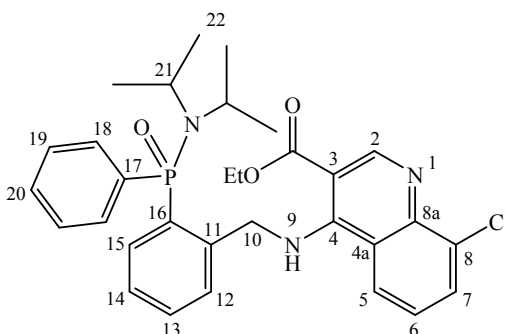

White solid. Yield: 62%. Empirical formula:  $C_{31}H_{35}ClN_3O_3P$ . MW: 564.05 g/mol. Mp = 211 °C.  $^1H$ -NMR (499.84 MHz,  $CDCl_3$ , ppm):  $\delta$  1.15 and 1.22 (12H, H-22), 1.36 (t, 3H,  $^3J_{HH} = 7.1$  Hz,  $OCH_2CH_3$ ), 3.45 (2H, H-21), 4.35 (q, 2H,  $^3J_{HH} = 7.1$  Hz,  $OCH_2$ ), 4.45 (d, 1H,  $^2J_{HH} = 9.9$  Hz, H-10), 4.71 (d, 1H,  $^2J_{HH} = 9.9$  Hz, H-10'), 6.05 (s, 1H, H-9), 7.23-7.27 (m, 1H, H-6), 7.31-7.46 (m, 7H), 7.66-7.78 (m, 4H), 9.17 (s, 1H, H-2).  $^{13}C$ -NMR (125.69 MHz,  $CDCl_3$ , ppm):  $\delta$  14.61 (s,  $OCH_2CH_3$ ), 23.41-23.43 (C-22), 47.63 (d,  $^2J_{PC}$

= 5.0 Hz, C-21), 60.80 ( $\text{OCH}_2\text{CH}_3$ ), 64.69 (d,  $^3J_{\text{PC}} = 5.0$  Hz, C-10), 101.68 (C-3), 119.44 (C-4a), 119.84 (C-5), 125.06 (C-6), 126.96 (d,  $^3J_{\text{PC}} = 12.5$  Hz, C-19 or C-14), 128.24 (d,  $^3J_{\text{PC}} = 12.5$  Hz, C-19 or C-14), 131.46 (C-13), 131.63 (C-18 or C-15), 131.68 (C-18 or C-15), 132.14, 132.22, 133.46, (C-17 or C-16), 133.47 (C-17 or C-16), 134.50, 152.43 (C-2), 153.74 (C-8), 167.99 (C=O).  $^{31}\text{P}$ -NMR (202.34 MHz,  $\text{CDCl}_3$ , ppm):  $\delta$  35.77. IR: 3378 ( $\nu\text{NH}$ ), 3165 ( $\nu\text{CH}$ ), 1687 ( $\nu\text{C=O}$ ), 1626 ( $\nu\text{C=N}$ ), 1495 ( $\nu\text{P-Ph}$ ), 1254 ( $\nu\text{C-O}$ ), 1167 ( $\nu\text{P=O}$ ), 781 ( $\nu\text{C-Cl}$ ).

## 6b

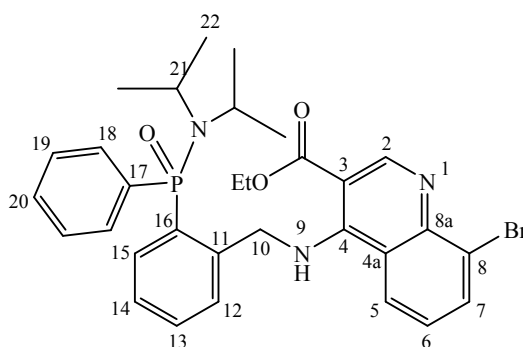

White solid. Yield: 59%. Empirical formula:  $\text{C}_{31}\text{H}_{35}\text{BrN}_3\text{O}_3\text{P}$ . MW: 608.51 g/mol. Mp = 249 °C.  $^1\text{H}$ -NMR (499.84 MHz,  $\text{DMSO-}d_6$ , ppm):  $\delta$  1.12 and 1.22 (12H, H-22), 1.36 (t, 3H,  $^3J_{\text{HH}} = 7.1$  Hz,  $\text{OCH}_2\text{CH}_3$ ), 3.45 (2H, H-21), 4.36 (q, 2H,  $^3J_{\text{HH}} = 7.1$  Hz,  $\text{OCH}_2$ ), 4.61 (d, 1H,  $^2J_{\text{HH}} = 9.9$  Hz, H-10), 4.63 (d, 1H,  $^2J_{\text{HH}} = 9.9$  Hz, H-10'), 5.52 (1H, H-9), 7.40-7.66 (m, 9H), 8,10 (H-7 or H-5), 8.11 (H-7 or H-5), 8.40 to 8.43 (m, 2H), 8.98 (s, 1H, H-2).  $^{13}\text{C}$ -NMR (125.69 MHz,  $\text{DMSO-}d_6$ , ppm):  $\delta$  14.32 ( $\text{OCH}_2\text{CH}_3$ ), 23.09 and 23.14 (C-22), 46.97 (C-21), 60.67 ( $\text{OCH}_2\text{CH}_3$ ), 61.95 (d,  $^3J_{\text{PC}} = 5.0$  Hz, C-10), 100.57 (C-3), 119.82 (C-4a), 123.30 (C-5), 124.53 (C-4), 125.96 (C-6), 126.58 (d,  $^2J_{\text{PC}} = 12.5$  Hz, C-18), 128.56 (d,  $^2J_{\text{PC}} = 11.3$  Hz, C-15), 128.85 (C-12), 130.92 (C-11), 131.62 (C-19 or C-14), 131.79 (C-19 or C-14), 132.03 (C-18 or C-15), 132.66 (C-18 or C-15), 134.91 (d,  $^1J_{\text{PC}} = 120.6$  Hz, C-17 or C-16), 135.32 (C-7), 146.27 (d,  $^1J_{\text{PC}} = 118.1$  Hz, C-

17 or C-16), 152.19 (C-2), 154.43 (C-8), 167.41 (C=O).  $^{31}\text{P}$ -NMR (202.34 MHz, DMSO- $d_6$ , ppm):  $\delta$  34.18. IR: 3370 ( $\nu\text{NH}$ ), 2961 ( $\nu\text{CH}$ ), 1687 ( $\nu\text{C=O}$ ), 1628 ( $\nu\text{C=N}$ ), 1442 ( $\nu\text{P-Ph}$ ), 1258 ( $\nu\text{C-O}$ ), 1175 ( $\nu\text{P=O}$ ), 980 ( $\nu\text{P-N-C}$ ), 760 ( $\nu\text{C-Br}$ ).

### 6c

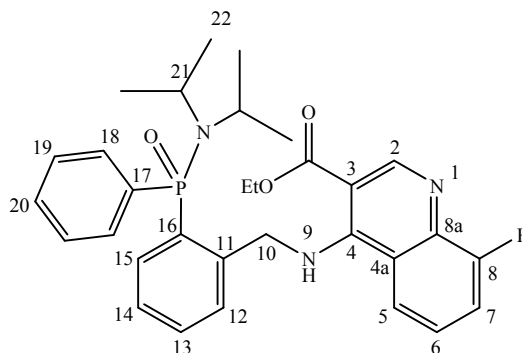

White solid. Yield: 69%. Empirical formula:  $\text{C}_{31}\text{H}_{35}\text{FN}_3\text{O}_3\text{P}$ . MW: 547.60 g/mol. Mp = 228 °C.  $^1\text{H}$ -NMR (499.84 MHz, DMSO- $d_6$ , ppm):  $\delta$  1.16 and 1.22 (12H,  $^3J_{\text{HH}} = 4.9$  Hz, H-22), 1.55 (m, 3H,  $\text{OCH}_2\text{CH}_3$ ) 3.44 (2H,  $^3J_{\text{HH}} = 4.9$  Hz and  $^3J_{\text{PH}} = 9.9$  Hz, H-21), 4.05 (q, 2H,  $^3J_{\text{HH}} = 7.1$  Hz,  $\text{OCH}_2$ ), 4.45 (d, 1H,  $^2J_{\text{HH}} = 9.9$  Hz, H-10), 4.71 (d, 1H,  $^2J_{\text{HH}} = 9.9$  Hz, H-10'), 6.05 (1H, H-9), 6.72 (H-5), 7.02 (m, 1H, H-7), 7.23-7.27 (m, 1H, H-6), 7.33-7.46 (m, 6H), 7.55 (m, 1H), 7.66-7.70 (m, 2H), 8.29 (s, 1H, H-2).  $^{13}\text{C}$ -NMR (125.69 MHz, DMSO- $d_6$ , ppm):  $\delta$  14.47 ( $\text{OCH}_2\text{CH}_3$ ), 23.18 and 23.21 (C-22), 47.08 (C-21), 60.12 ( $\text{OCH}_2\text{CH}_3$ ), 62.01 (d,  $^3J_{\text{PC}} = 3.8$  Hz, C-10), 126.68 (d,  $^2J_{\text{PC}} = 12.6$  Hz, C-18), 128.65 (d,  $^2J_{\text{PC}} = 12.6$  Hz, C-15), 128.93 (d,  $^3J_{\text{PC}} = 11.3$  Hz, C-12), 130.94 (C-11), 131.72 (C-19 or C-14), 131.90 (C-19 or C-14), 132.14 (C-6), 132.77 (d,  $^2J_{\text{FC}} = 11.3$  Hz, C-7), 134.91 (d,  $^1J_{\text{PC}} = 122.2$  Hz, C-17 or C-16), 146.73 (C-8), 162.02 (C=O).  $^{31}\text{P}$ -NMR (202.34 MHz, DMSO- $d_6$ , ppm):  $\delta$  34.20. IR: 3380 ( $\nu\text{NH}$ ), 2960 ( $\nu\text{CH}$ ), 1683 ( $\nu\text{C=O}$ ), 1627 ( $\nu\text{C=N}$ ), 1435 ( $\nu\text{P-Ph}$ ), 1180 ( $\nu\text{P=O}$ ), 980 ( $\nu\text{P-N-C}$ ), 1181 ( $\nu\text{CF}$ ).



**8a**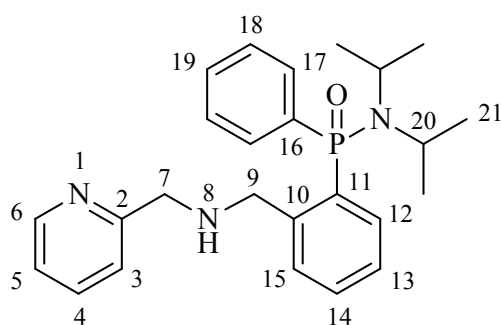

Yellow oil. Yield: 71%. Empirical formula:  $C_{25}H_{32}N_3OP$ . MW: 421.51 g/mol.  $^1H$ -NMR (499.84 MHz,  $CDCl_3$ , ppm):  $\delta$  1.15 and 1.22 (H-21), 3.44 (2H, H-20), 3.78-4.07 (m, 2H, H-7), 4.45 (d, 1H,  $^2J_{HH} = 9.9$  Hz, H-9), 4.71 (d, 1H,  $^2J_{HH} = 9.9$  Hz, H-9'), 5.73 (1H, H-8), 7.23-7.27 (m, 1H, H-4), 7.33-7.46 (m, 6H), 7.48-7.64 (m, 1H), 7.64-7.70 (m, 2H, H-17), 7.74-7.86 (m, 1H), 8.01-8.04 (m, 1H, H-6).  $^{31}P$ -NMR (202.34 MHz,  $CDCl_3$ , ppm):  $\delta$  33.69. IR: 3298 ( $\nu$ N-H), 2968 ( $\nu$ C-H), 1591 ( $\nu$ C=N), 1435 ( $\nu$ P -Ph), 1176 ( $\nu$ P=O), 978 ( $\nu$ P-N-C).

**8b**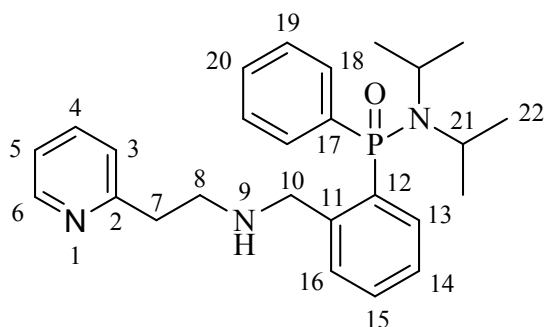

Yellow oil. Yield: 69%. Empirical formula:  $C_{26}H_{34}N_3OP$ . MW: 435.54 g/mol.  $^1H$ -NMR (499.84 MHz,  $CDCl_3$ , ppm):  $\delta$  1.10 and 1.22 (2d, 12H, H-22), 2.82-2.92 (m, 4H, H-7, H-8), 3.38 (2H, H-21), 3.79 (d, 1H,  $^2J_{HH} = 14.9$  Hz, H-10), 4.03 (d, 1H,  $^2J_{HH} = 14.9$  Hz, H-10'), 7.00 (1H, H-5), 7.08 (d, 1H,  $^3J_{HH} = 9.9$  Hz, H-3), 7.19-7.22 (m, 1H, H-4), 7.50-7.31 (m, 6H), 7.62 (d, 2H,  $^3J_{HH} = 9.9$  Hz, H-18), 8.41 (d, 1H,  $^3J_{HH} = 9.9$  Hz, H-6).  $^{31}P$ -

NMR (202.34 MHz, CDCl<sub>3</sub>, ppm):  $\delta$  34.20. IR: 3298 ( $\nu$ N-H), 2968 ( $\nu$ C-H), 1591 ( $\nu$ C=N), 1435 ( $\nu$ P-Ph), 1176 ( $\nu$ P=O), 978 ( $\nu$ P-N-C).

### 11a

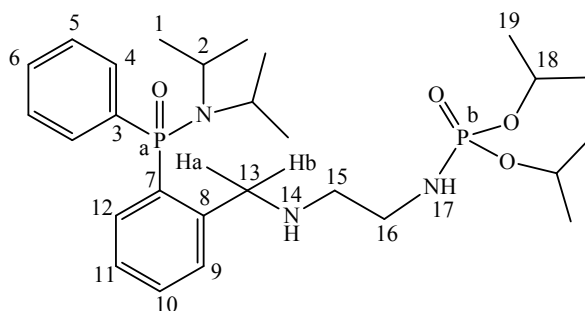

Yellow oil. Yield: 68%. Empirical formula: C<sub>27</sub>H<sub>45</sub>N<sub>3</sub>O<sub>4</sub>P<sub>2</sub> MW: 537.61 g/mol. <sup>1</sup>H-NMR (299.95 MHz, CDCl<sub>3</sub>, ppm):  $\delta$  1.21-1.31 (m, 24H, H-1, H-19), 2.51 (1H, H-14), 2.64 (m, 2H, H-15), 2.89-3.03 (m, 2H, H-16), 3.46 (dhep, 2H, <sup>3</sup>J<sub>HH</sub> = 5.9 Hz, <sup>3</sup>J<sub>PH</sub> = 8.9 Hz, H-2), 3.70 (d, 1H, <sup>2</sup>J<sub>HH</sub> = 11.9 Hz, H-13b), 3.91 (d, 1H, <sup>2</sup>J<sub>HH</sub> = 11.9 Hz, H-13a), 4.48-4.62 (m, 2H, H-18), 6.12 (1H, H-17), 7.36-7.53 (m, 7H, H-5, H-6, H-9, H-10, H-11), 7.63-7.77 (m, 3H, H-4, H-12). <sup>31</sup>P-NMR (121.42 MHz, CDCl<sub>3</sub>, ppm):  $\delta$  8.83 (Pb), 34.29 (Pa). IR: 3361 and 3254 ( $\nu$ N-H), 2978 ( $\nu$ C-H), 1214 ( $\nu$ P=O phosphoramidate), 1178 ( $\nu$ P=O phosphinic amide) 979 ( $\nu$ P-O).



**11c**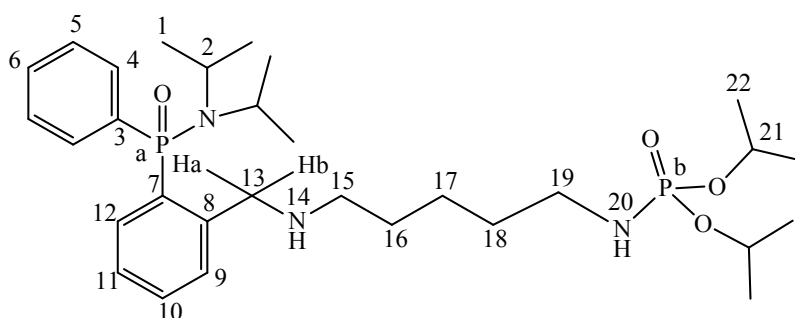

Yellow oil. Yield: 68%. Empirical formula:  $C_{30}H_{51}N_3O_4P_2$  MW: 579.69 g/mol.  $^1H$ -NMR (499.84 MHz,  $CDCl_3$ , ppm):  $\delta$  0.82 (m, 2H, H-17), 1.11-1.25 (m, 24H, H-1, H-22), 1.34-1.48 (m, 4H, H-16, H-18), 2.47 (H-15), 2.75-2.84 (m, 2H, H-19), 3.35-3.45 (m, 3H, H-2, H-14), 3.70 (d, 1H,  $^2J_{HH} = 14.9$  Hz, H-13b), 4.04 (d, 1H,  $^2J_{HH} = 14.9$  Hz, H-13a), 4.45-4.54 (m, 2H, H-21), 7.36-7.47 (m, 7H, H-5, H-6, H-9, H-10, H-11, H-12), 7.60-7.65 (m, 2H, H-4).  $^{13}C$ -NMR (125.69 MHz,  $CDCl_3$ , ppm.):  $\delta$  23.25 (C-1), 23.67 (C-22), 24.09 (C-17), 28.75 (C-16), 31.24 (C-18), 41.20 (C-19), 47.34 (C-2), 48.50 (C-15), 52.23 (d,  $^3J_{PC} = 5.0$  Hz, C-13), 70.36 (d,  $^2J_{PC} = 6.3$  Hz, C-21), 126.63, 128.10 (C-5), 131.36, 131.73 (C-4), 132.92 (C-9), 132.55 (d,  $^1J_{PC} = 123.2$  Hz, C-3), 134.72 (d,  $^1J_{PC} = 121.9$  Hz, C-7), 134.88 (C-8).  $^{31}P$ -NMR (202.34 MHz,  $CDCl_3$ , ppm):  $\delta$  7.66 (Pb) and 34.82 (Pa). IR: 3371 and 3203 ( $\nu$ N-H), 2927 ( $\nu$ C-H), 1205 ( $\nu$ P=O phosphoramidate), 1177 ( $\nu$ P=O phosphinic amide) 978 ( $\nu$ P-O). HRMS (ESI)  $m/z$ , calc. for  $C_{30}H_{51}N_3O_4P_2$ : 580.3433  $[M+H]^+$ ; found: 580.3428.

**11d**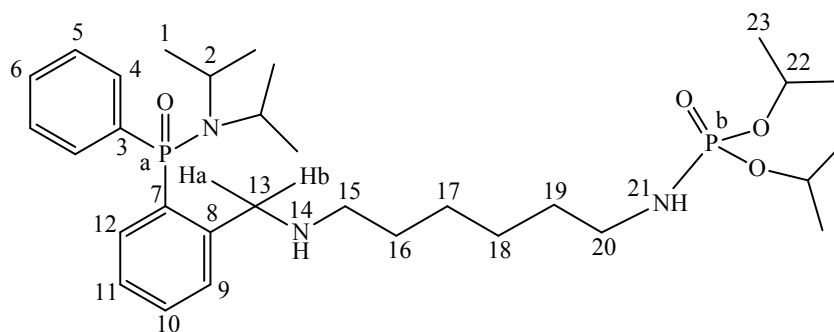

Yellow oil. Yield: 69%. Empirical formula:  $C_{31}H_{53}N_3O_4P_2$  MW: 593.72 g/mol.  $^1H$ -NMR (299.95 MHz,  $CDCl_3$ , ppm):  $\delta$  1.11-1.13 (m, 4H, H-17, H-18), 1.23-1.25 (m, 24H, H-1, H-23), 1.33-1.43 (m, 4H, H-16, H-19), 2.32-2.44 (m, 3H, H-14, H-15), 2.76-2.84 (m, 2H, H-20), 3.33-3.48 (m, 2H, H-2), 3.69 (d, 1H,  $^2J_{HH} = 11.9$  Hz, H-13b), 4.03 (d, 1H,  $^2J_{HH} = 11.9$  Hz, H-13a), 4.46-4.57 (m, 2H, H-22), 7.34-7.49 (m, 7H, H-5, H-6, H-9, H-10, H-11, H-12), 7.61-7.68 (m, 2H, H-4).  $^{13}C$ -NMR (75.43 MHz,  $CDCl_3$ , ppm):  $\delta$  23.13 (C-1), 23.57 (C-23), 26.17 (C-18), 26.58 (C-17), 28.88 (C-16), 31.27 ( $^3J_{PC} = 6.8$  Hz, C-19), 41.13 (C-20), 47.22 (C-2), 48.38 (C-15), 51.99 (d,  $^3J_{PC} = 3.8$  Hz, C-13), 70.25 (d,  $^2J_{PC} = 6.0$  Hz, C-22), 126.54, 127.99 (C-5), 131.26, 131.60 (C-4), 132.50 (C-9), 132.83, 134.70 (d,  $^1J_{PC} = 121.4$  Hz, C-3), 132.21 (d,  $^1J_{PC} = 123.7$  Hz, C-7), 142.54 (C-8).  $^{31}P$ -NMR (121.42 MHz,  $CDCl_3$ , ppm):  $\delta$  7.66 (Pb), 34.87 (Pa). IR: 3405 and 3251 (vN-H), 2931 (vC-H), 1205 (vP=O phosphoramidate), 1176 (vP=O phosphinic amide) 976 (vP-O). HRMS (ESI)  $m/z$ , calc. for  $C_{31}H_{53}N_3O_4P_2$ : 594.3589  $[M+H]^+$ ; found: 594.3584.

**13a**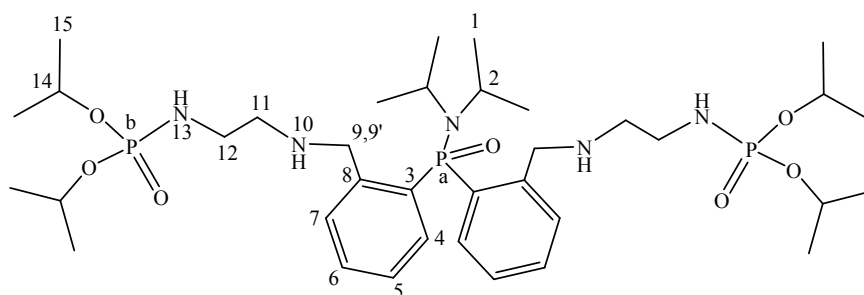

Yellow oil. Yield: 68%. Empirical formula:  $C_{36}H_{66}N_5O_7P_3$  MW: 773.85 g/mol.  $^1H$ -NMR (299.95 MHz,  $CDCl_3$ , ppm):  $\delta$  0.84 (m, 4H, H-12), 1.12-1.22 (m, 36H, H-1, H-15), 1.49-1.98(m, 4H, H-11), 2.73-2.79 (2H, H-10), 3.42-3.51 (m, 2H, H-9/9'), 3.64 (1H, H-9), 3.92 (1H, H-9'), 4.38 (dhep, 4H,  $^3J_{HH} = 5.9$ ,  $^3J_{PH} = 8.9$  Hz, H-14), 4.70-4.79 (2H, H-13), 7.51-7.80 (m, 8H, H-4, H-5, H-6, H-7).  $^{13}C$ -NMR (75.43 MHz,  $CDCl_3$ , ppm):  $\delta$  23.69 (C-15), 29.36 (C-1), 39.33 (C-11), 42.59 (d,  $^3J_{PC} = 5.3$  Hz, C-9), 47.73 (d,  $^2J_{PC} = 5.3$  Hz, C-12), 70.76 (d,  $^2J_{PC} = 5.3$  Hz, C-14), 70,43 (C-2), 127.21-133,54 (C-3, C-4, C-5, C-6, C-7, C-8).  $^{31}P$ -NMR (121.42 MHz,  $CDCl_3$ , ppm):  $\delta$  8.62 (2P, Pb), 28.90 (1P, Pa). IR: 3386 and 3233 ( $\nu$ N-H), 2976 ( $\nu$ C-H), 1205 ( $\nu$ P=O phosphoramidate), 1177 ( $\nu$ P=O phosphinic amide) 979 ( $\nu$ P-O).

**13b**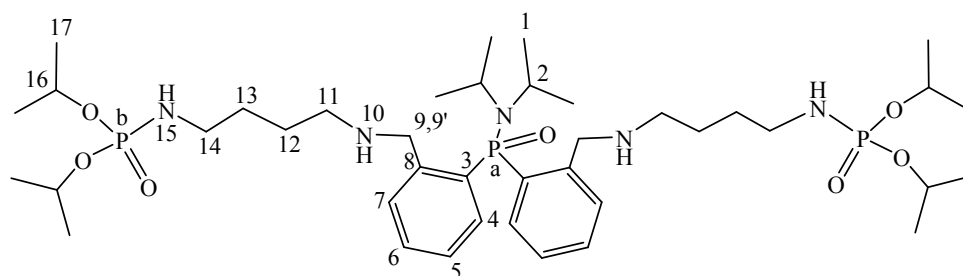

Yellow oil. Yield: 58%. Empirical formula:  $C_{40}H_{74}N_5O_7P_3$  MW: 829.96 g/mol.  $^1H$ -NMR (299.95 MHz,  $CDCl_3$ , ppm):  $\delta$  1.14-1.27 (m, 36H, H-1, H-17), 1.41-1.49 (m, 4H, H-13), 2.43-2.57 (m, 4H, H-12), 2.72-2.87 (m, 4H, H-14), 3.13-3.22 (2H, H-10), 3.39

(dhep, 2H,  $^3J_{\text{HH}} = 5.9$  Hz,  $^3J_{\text{PH}} = 8.9$  Hz, H-2), 3.70 (d, 2H,  $^2J_{\text{HH}} = 14.9$  Hz, H-9/9'), 4.09 (d, 2H,  $^2J_{\text{HH}} = 14.9$  Hz, H-9/9'), 4.49 (4H, H-16), 7.19-7.20 (m, 2H, H-6), 7.23 (m, 4H, H-4, H-5), 7.73-7.80 (m, 1H, H-7).  $^{13}\text{C}$ -NMR (75.43 MHz,  $\text{CDCl}_3$ , ppm):  $\delta$  22.82 and 22.88 (C-17), 25.64 (C-12), 28.38 (C-1), 40.21 (C-13), 46.07 (d,  $^3J_{\text{PC}} = 4.5$  Hz, C-9), 46.67 (d,  $^2J_{\text{PC}} = 5.3$  Hz, C-14), 47.23 (C-11), 69.39 (d,  $^2J_{\text{PC}} = 5.3$  Hz, C-2), 69.64 (d,  $^2J_{\text{PC}} = 5.3$  Hz, C-16), 125.62-132.90 (C-3, C-4, C-5, C-6, C-7, C-8).  $^{31}\text{P}$ -NMR (121.42 MHz,  $\text{CDCl}_3$ , ppm):  $\delta$  8.23 (2P, Pb), 38.84 (1P, Pa). IR: 3409 and 3265 ( $\nu_{\text{N-H}}$ ), 2918 ( $\nu_{\text{C-H}}$ ), 1229 ( $\nu_{\text{P=O}}$  phosphoramidate), 1179 ( $\nu_{\text{P=O}}$  phosphinic amide), 979 ( $\nu_{\text{P-O}}$ ). HRMS (ESI)  $m/z$ , calc. for  $\text{C}_{40}\text{H}_{74}\text{N}_5\text{O}_7\text{P}_3$ : 830.4879  $[\text{M}+\text{H}]^+$ ; found: 830.4883.

### 13c

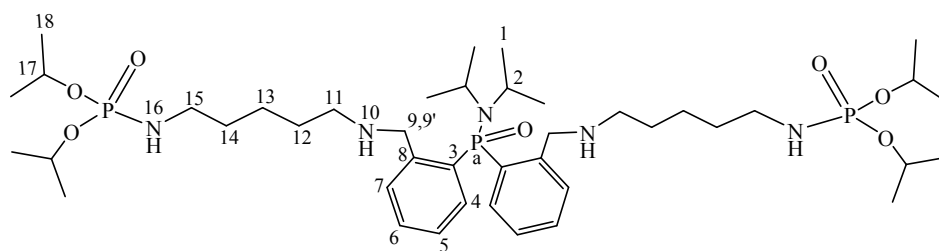

Yellow oil. Yield: 62%. Empirical formula:  $\text{C}_{42}\text{H}_{78}\text{N}_5\text{O}_7\text{P}_3$  MW: 858,01 g/mol.  $^1\text{H}$ -NMR (499.84 MHz,  $\text{CDCl}_3$ , ppm):  $\delta$  1.12-1.26 (m, 36H, H-1, H-18), 1.30-1.61 (m, 12H, H-12, H-13, H-14), 2.41-2.55 (m, 4H, H-11), 2.74-2.84 (m, 4H, H-15), 3.35-3.43 (m, 2H, H-2), 3.72 (d, 2H,  $^2J_{\text{HH}} = 14.9$  Hz, H-9/9'), 4.10 (d, 2H,  $^2J_{\text{HH}} = 14.9$  Hz, H-9/9'), 4.43-4.56 (m, 4H, H-17), 7.20 (m, 2H, H-6), 7.34-7.76 (m, 6H, H-4, H-5, H-7).  $^{13}\text{C}$ -NMR (125.69 MHz,  $\text{CDCl}_3$ , ppm):  $\delta$  15.08 (C-13), 23.66 and 23.67 (C-18), 24.17 (C-13), 28.91 (C-12), 31.18 (d,  $^3J_{\text{PC}} = 6.3$  Hz, C-14), 41.15 (d,  $^3J_{\text{PC}} = 1.3$  Hz, C-9), 47.54 (C-11), 48.50 (C-15), 70.26 (d,  $^2J_{\text{PC}} = 5.0$  Hz, C-2), 70.41 (d,  $^2J_{\text{PC}} = 5.0$  Hz, C-17), 126.60-133,33 (C-3, C-4, C-5, C-6, C-7, C-8).  $^{31}\text{P}$ -NMR (202.34 MHz,  $\text{CDCl}_3$ , ppm):  $\delta$  8.15 (2P, Pb), 38.62 (1P, Pa). IR: 3420 and 3251 ( $\nu_{\text{N-H}}$ ), 2930 ( $\nu_{\text{C-H}}$ ), 1205 ( $\nu_{\text{P=O}}$ )

phosphoramidate), 1177 (νP=O phosphinic amide), 978 (νP-O). HRMS (ESI)  $m/z$ , calc. for  $C_{42}H_{78}N_5O_7P_3$ : 858.5192  $[M+H]^+$ ; found: 858.5159.

### 13d

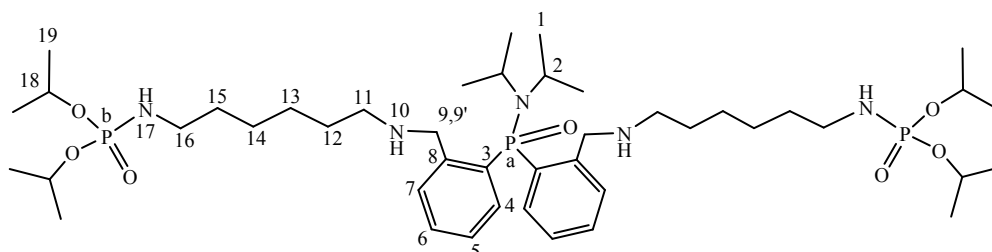

Yellow. Yield: 69%. Empirical formula:  $C_{44}H_{82}N_5O_7P_3$  MW: 886.07 g/mol.  $^1H$ -NMR (299.95 MHz,  $CDCl_3$ , ppm):  $\delta$  0.91-1.12 (m, 4H, H-14), 1.14-1.27 (m, 36H, H-1, H-19), 1.28-1.61 (m, 8H, H-12, H-13), 2.51 (m, 4H, H-15 or H-16), 2.72-2.85 (m, 4H, H-11), 3.32-3.46 (m, 2H, H-2), 3.73 (d, 2H,  $^2J_{HH} = 11.9$  Hz, H-9/9'), 4.10 (d, 2H,  $^2J_{HH} = 11.9$  Hz, H-9,9'), 4.45-4.57 (m, 4H, H-18), 7.19 (m, 2H, H-6), 7.24-7.77 (m, 6H, H-4, H-5, H-7).  $^{13}C$ -NMR (75.43 MHz,  $CDCl_3$ , ppm):  $\delta$  23.45-23.68 (C-19), 26.17 (C-14), 26.79 (C-13), 31.48 (d,  $^3J_{PC} = 6,8$  Hz, C-15), 41.23 (C-12), 47.55 (C-11), 48.67 (C-16), 51.97 (d,  $^3J_{PC} = 4.5$  Hz, C-9), 70.33 (d,  $^2J_{PC} = 5.3$  Hz, C-2), 70.41 (d,  $^2J_{PC} = 6.0$  Hz, C-18), 126.66-133.59 (C-3, C-4, C-5, C-6, C-7, C-8).  $^{31}P$ -NMR (121.42 MHz,  $CDCl_3$ , ppm):  $\delta$  4.75 (2P, Pb), 5.76 (1P, Pa). IR: 3409 and 3244 ( $\nu$ N-H), 2928 ( $\nu$ C-H), 1205 ( $\nu$ P=O phosphoramidate), 1182 ( $\nu$ P=O phosphinic amide), 979 ( $\nu$ P-O). HRMS (ESI)  $m/z$ , calc. for  $C_{44}H_{82}N_5O_7P_3$ : 886.5505  $[M+H]^+$ ; found: 886.5535.



# $^1\text{H}$ NMR, $^{13}\text{C}$ NMR, $^{31}\text{P}$ NMR, IR and HRMS (ESI) spectra

## IR spectrum of **1**

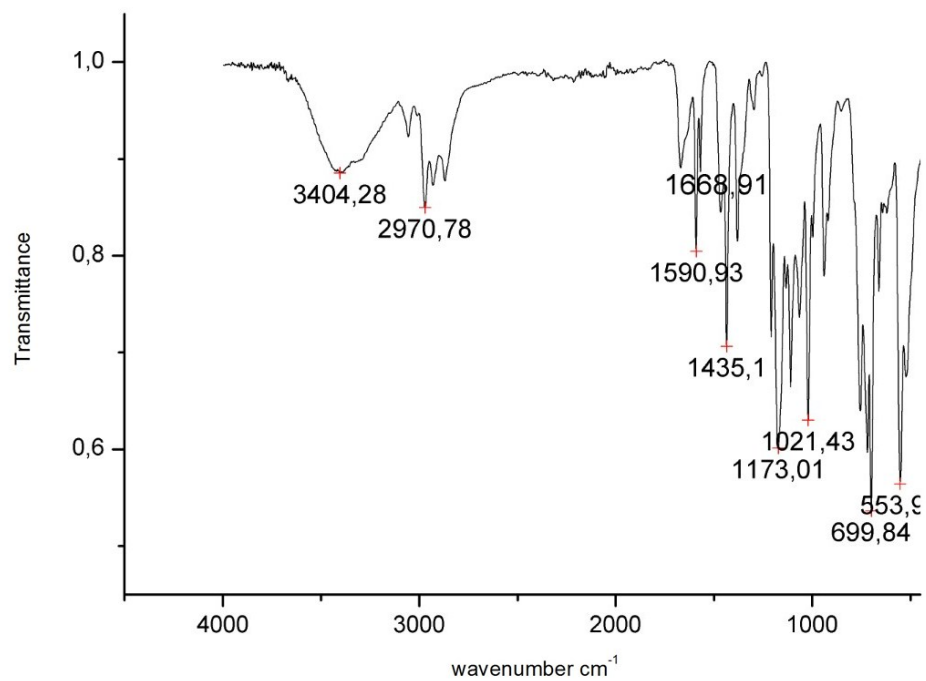

## $^1\text{H}$ NMR spectrum of **2**

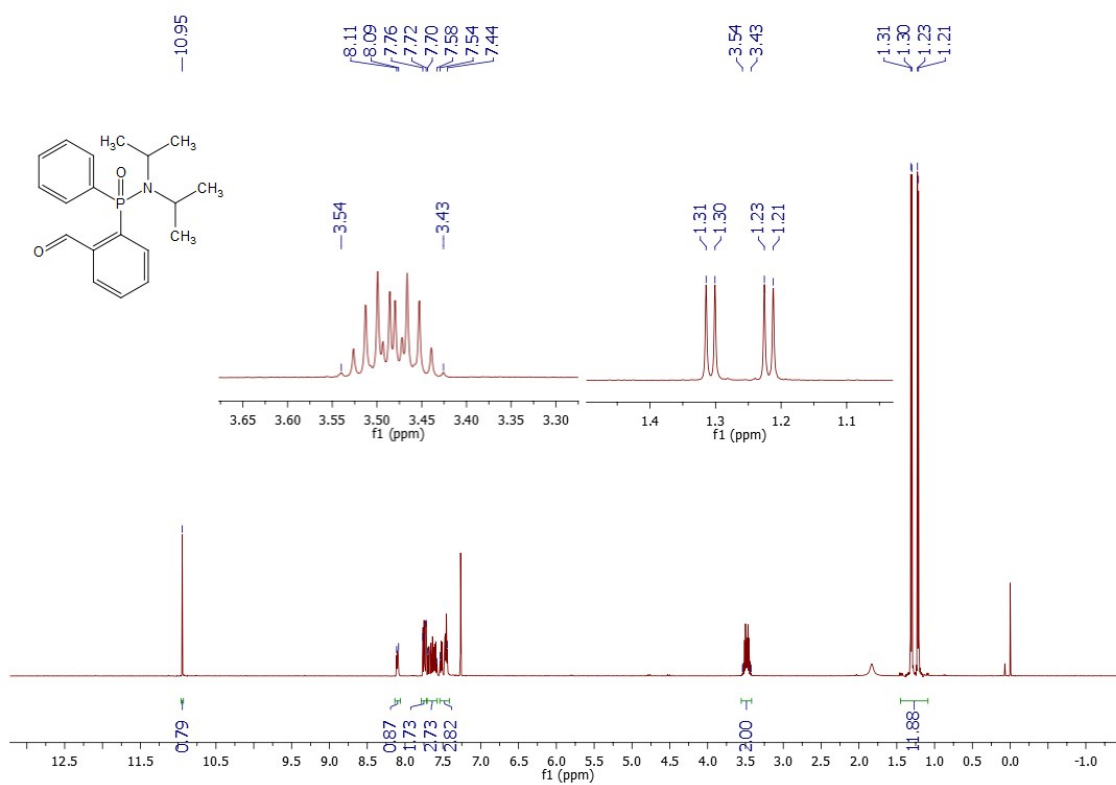

### $^{31}\text{P}$ NMR spectrum of **2**

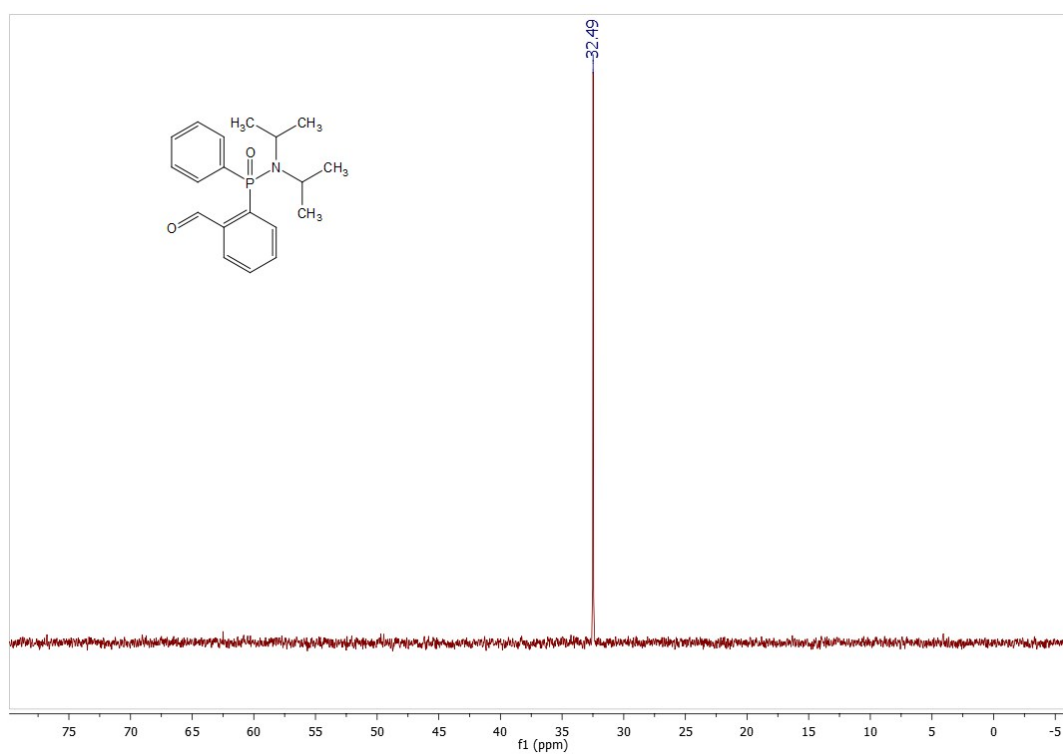

### IR spectrum of **2**

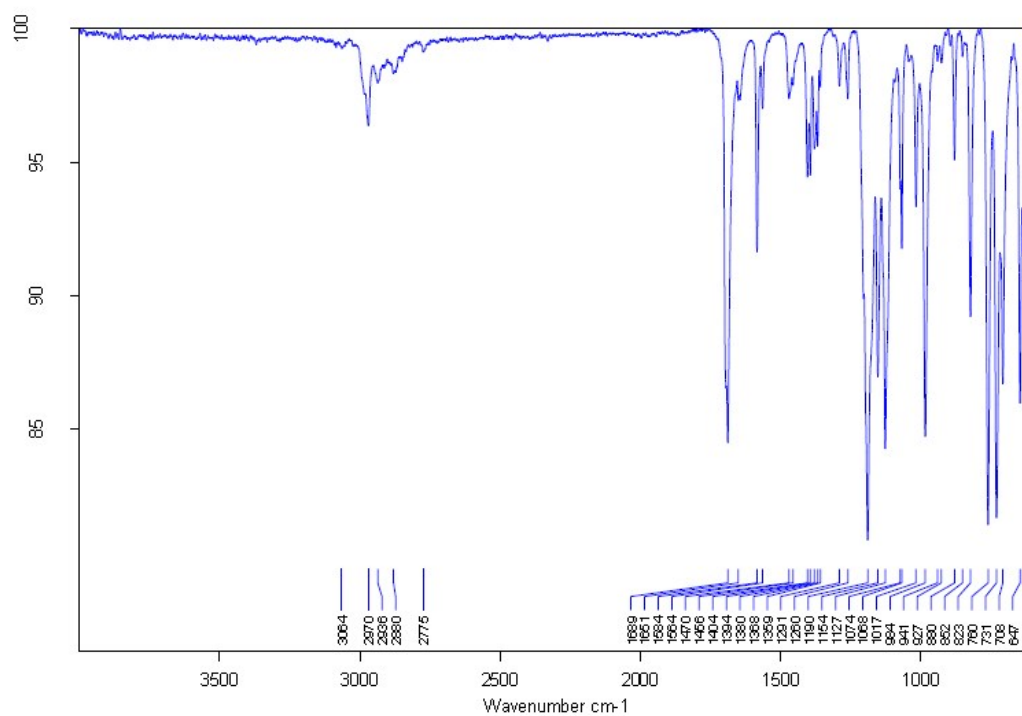

### $^1\text{H}$ NMR spectrum of **3**

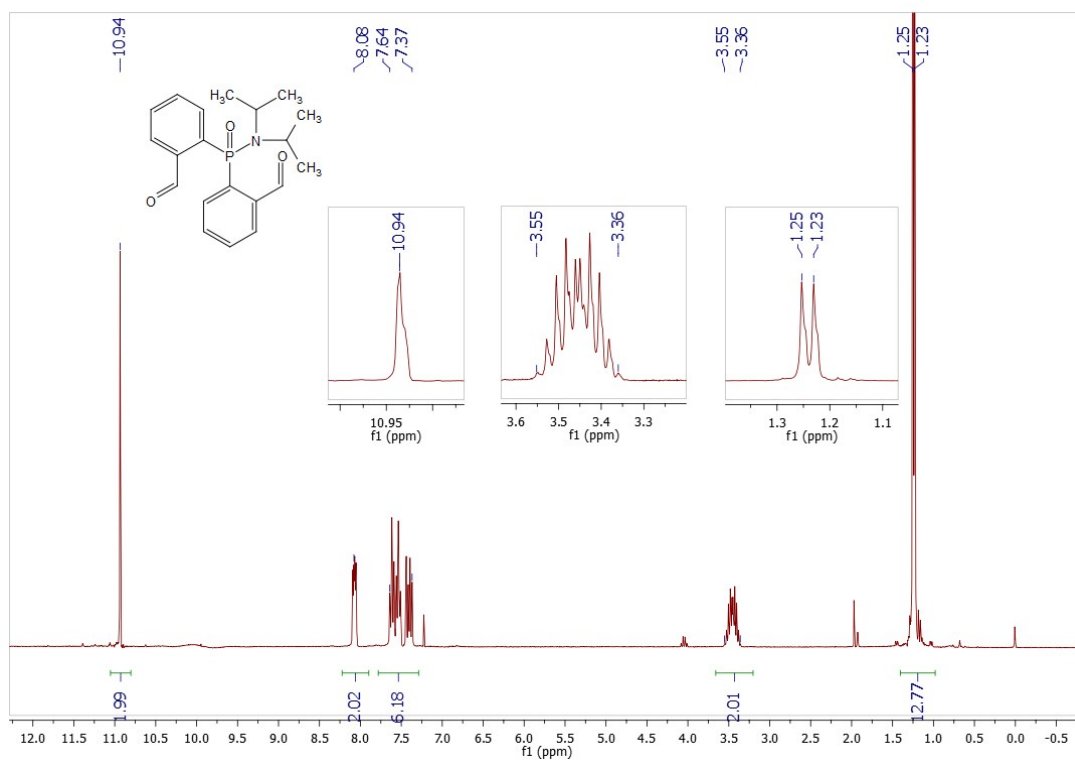

### APT $^{13}\text{C}$ NMR spectrum of **3**

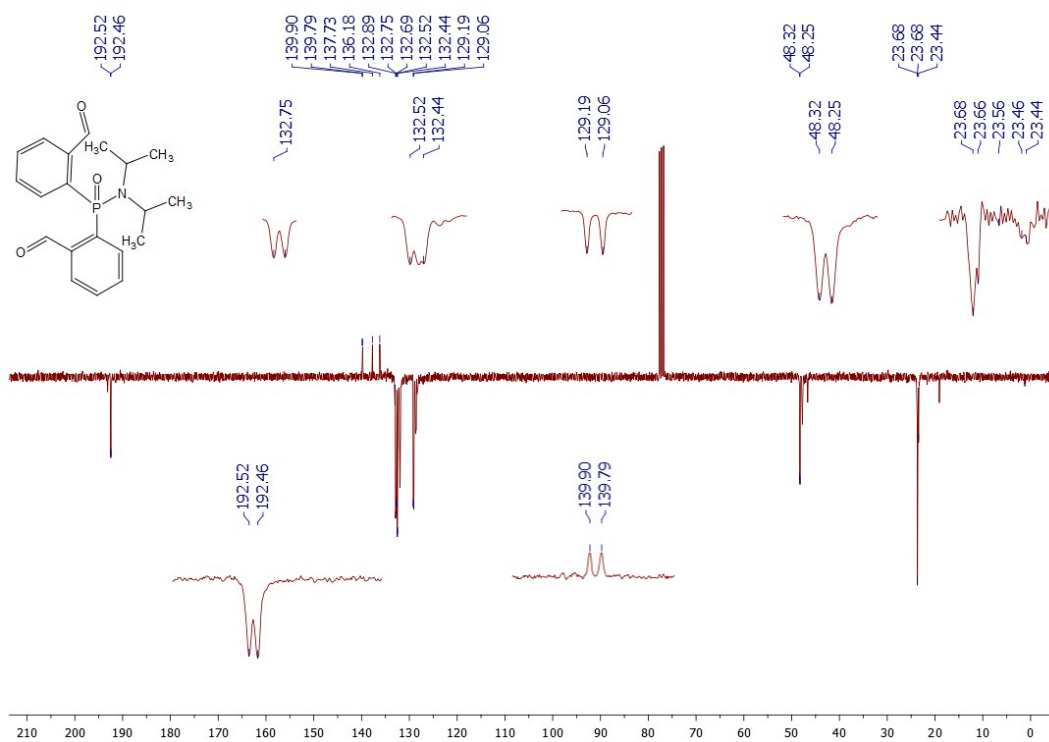

### $^{31}\text{P}$ NMR spectrum of **3**

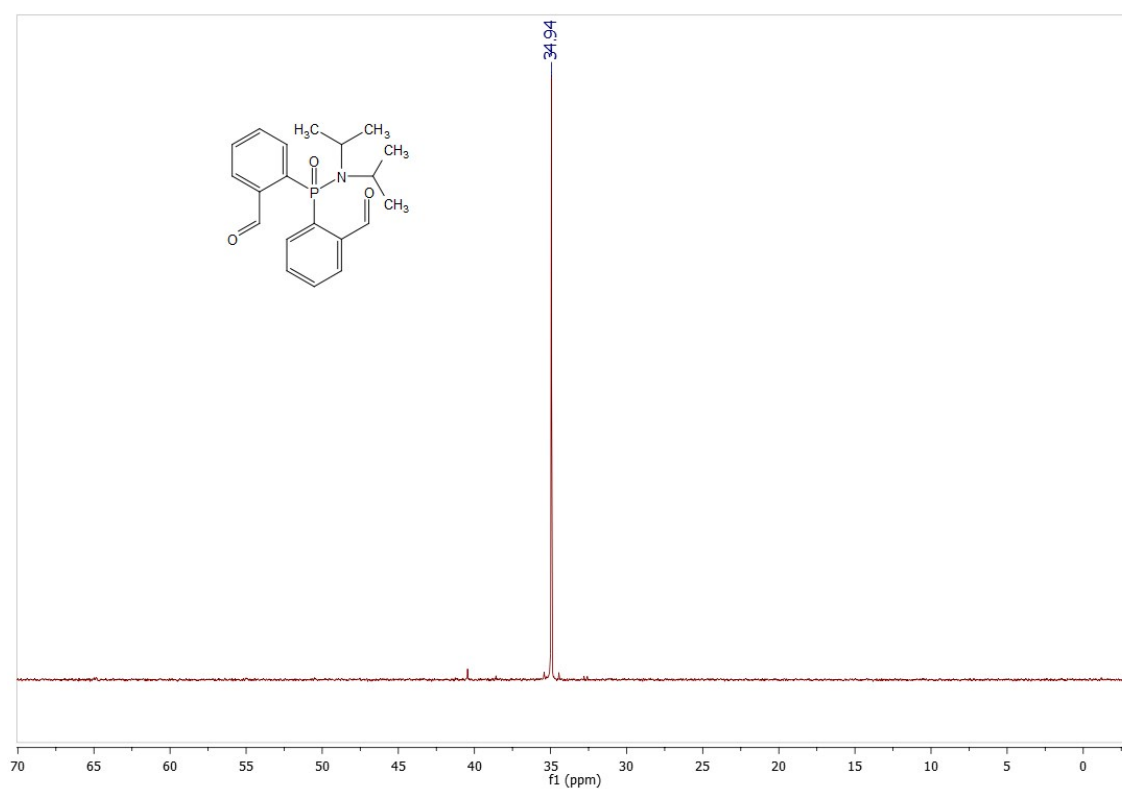

### IR spectrum of **3**

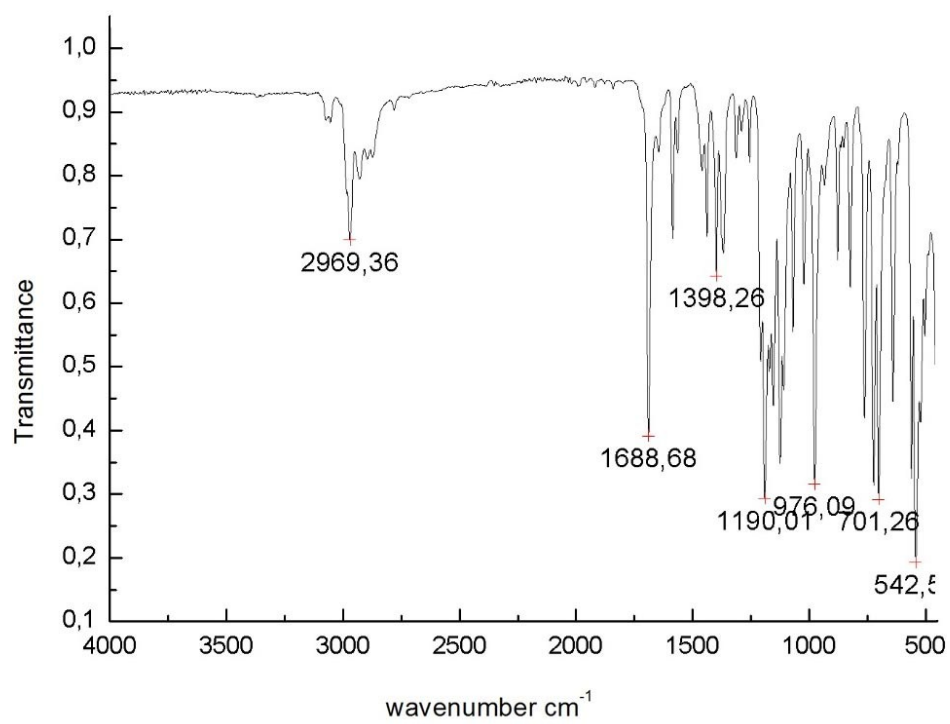

### HRMS (ESI) spectrum of **3**

N29CM16a

12-05-01 (0.030) Is (1.00,1.00) C<sub>20</sub>H<sub>25</sub>NO<sub>3</sub>P

1: TOF MS ES+  
7.90e12

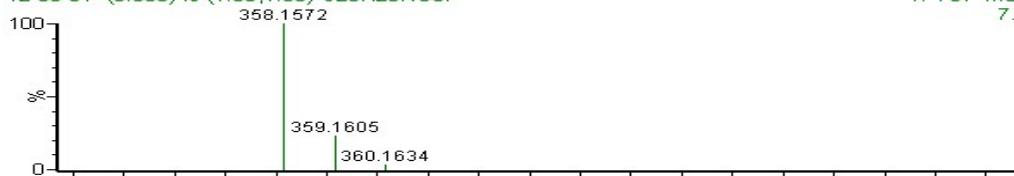

12-05-01 428 (1.615) Cm (428-33:130)

1: TOF MS ES+  
9.25e3

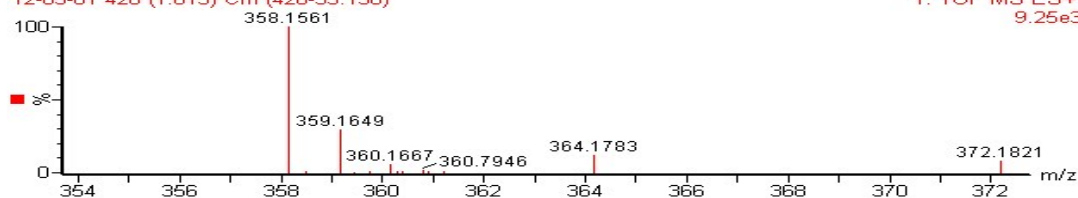

N29CM16a

12-05-01 428 (1.615) Cm (428-33:130)

1: TOF MS ES+  
9.25e3

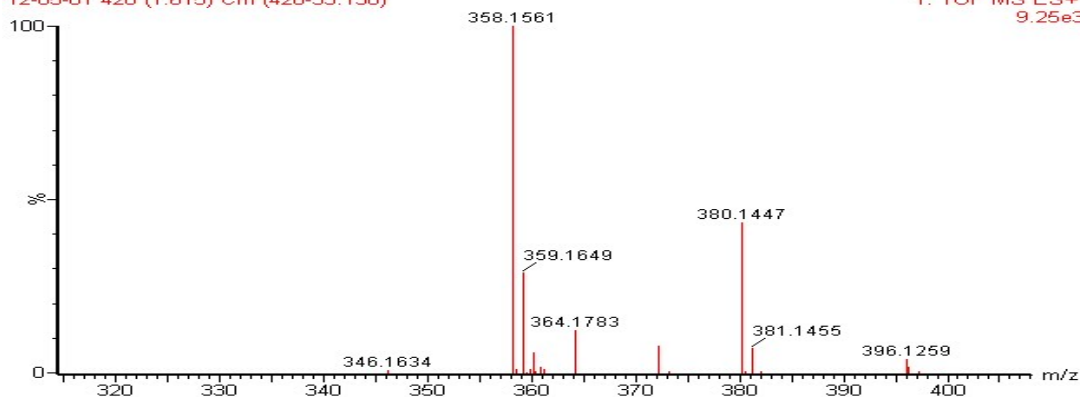

### <sup>1</sup>H NMR spectrum of **5a**

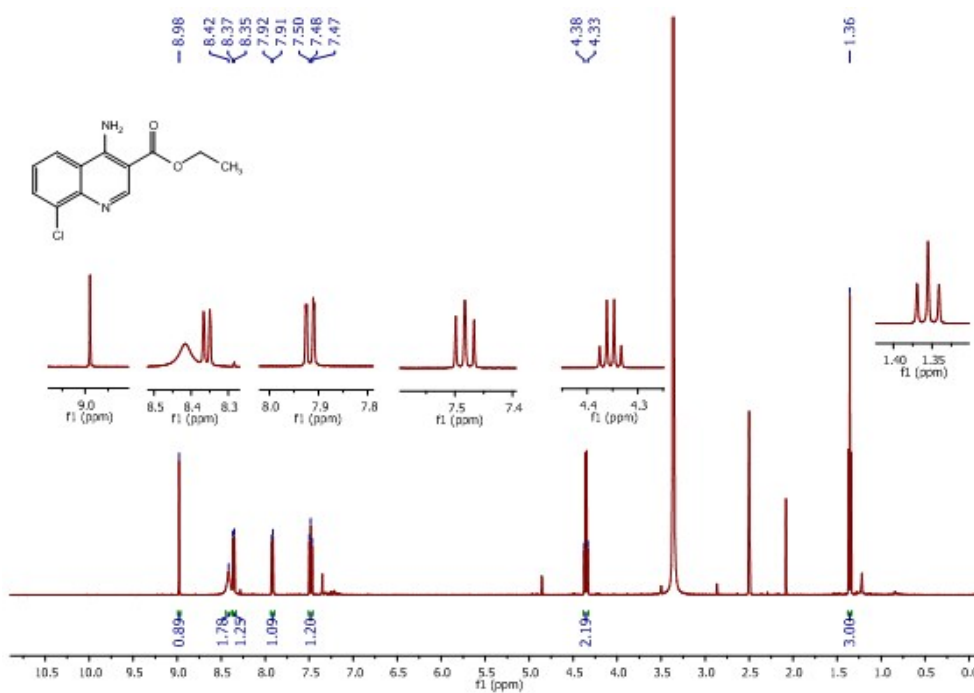

### APT <sup>13</sup>C NMR spectrum of **5a**

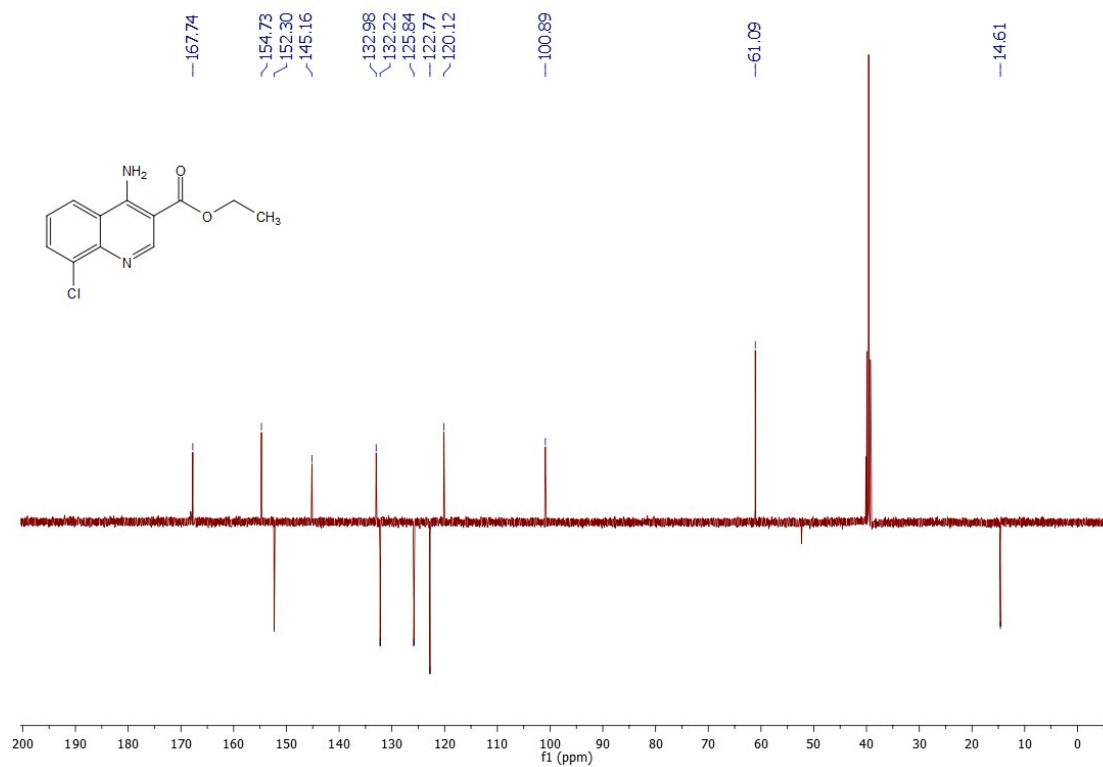

### IR spectrum of **5a**

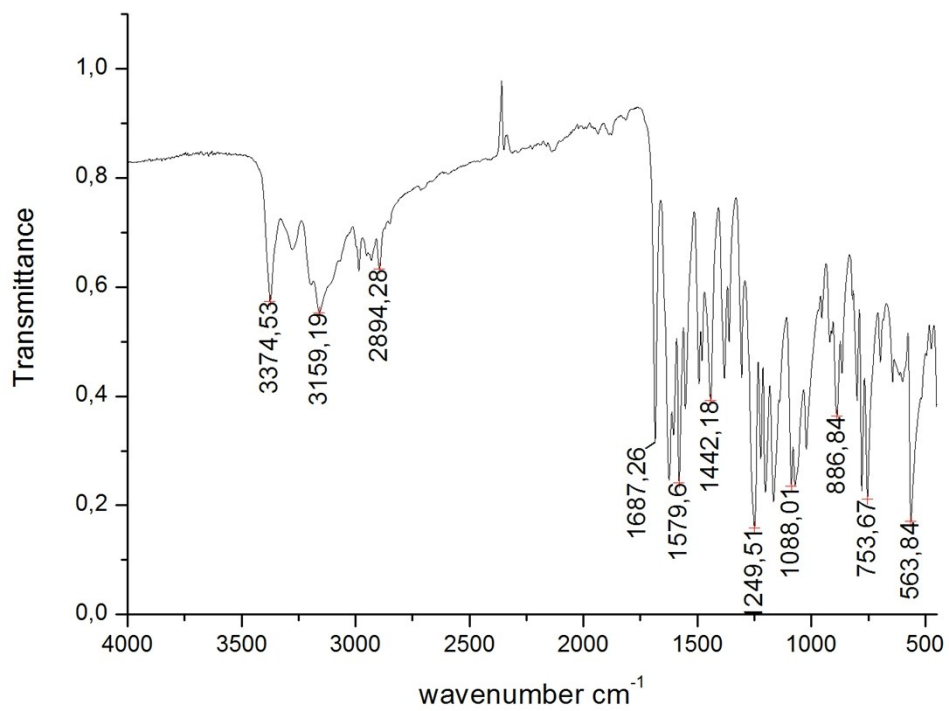

### $^1\text{H}$ NMR spectrum of **5b**

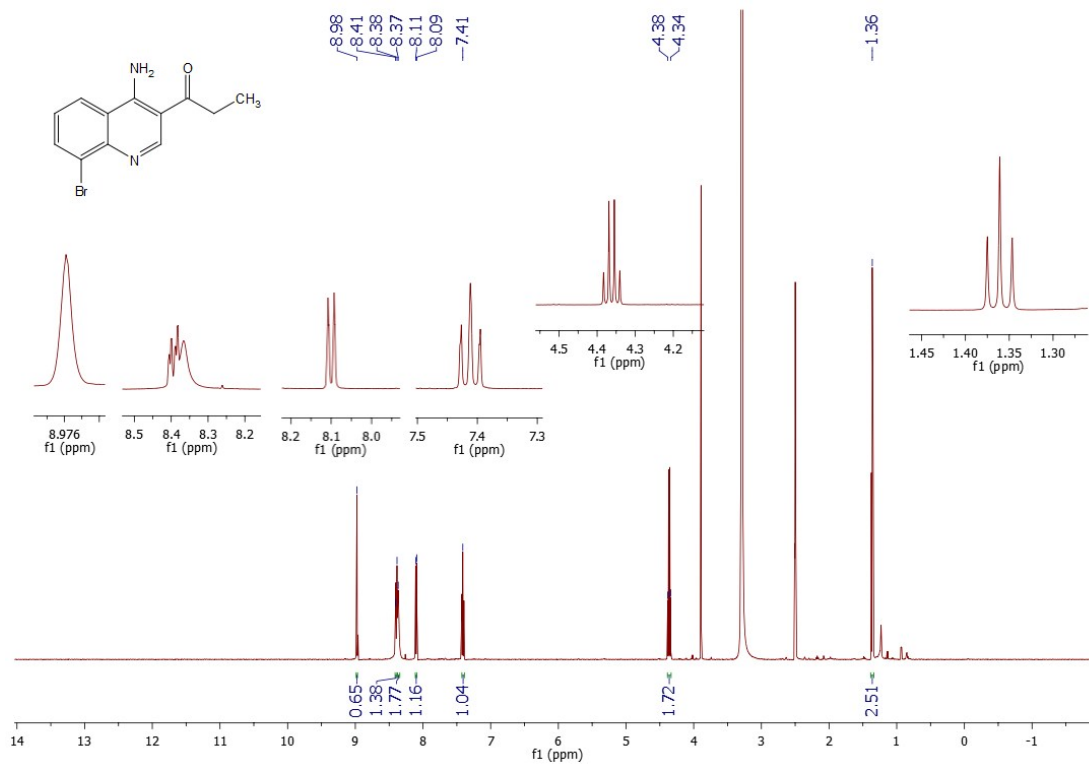

### APT $^{13}\text{C}$ NMR spectrum of **5b**

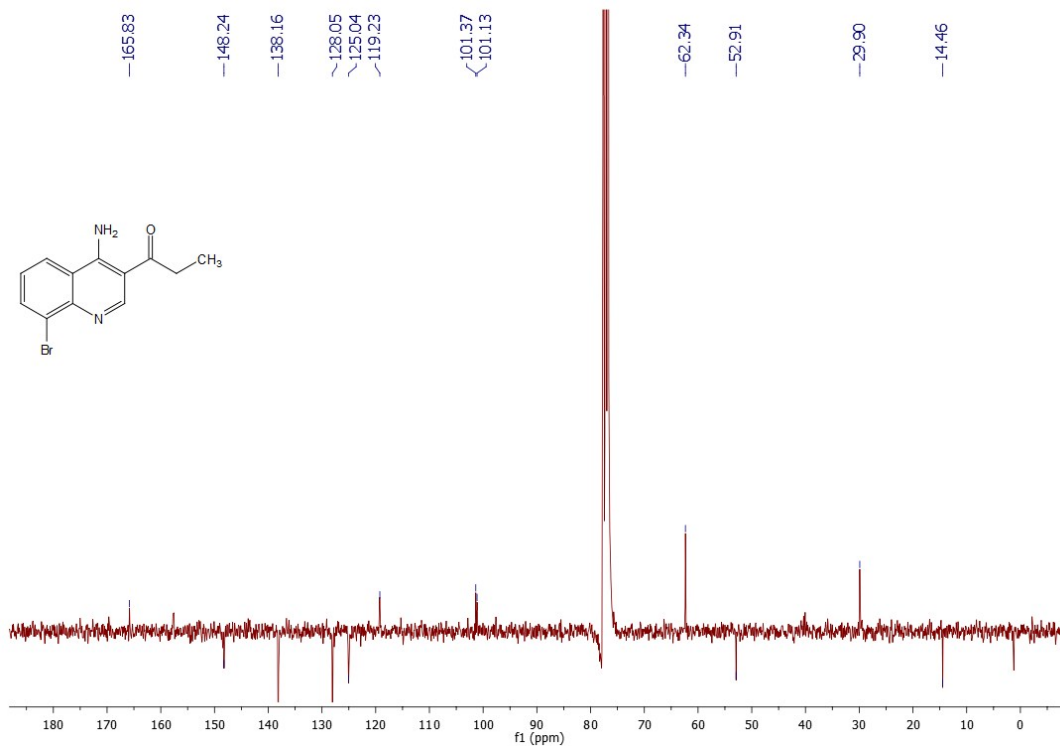

### IR spectrum of **5b**

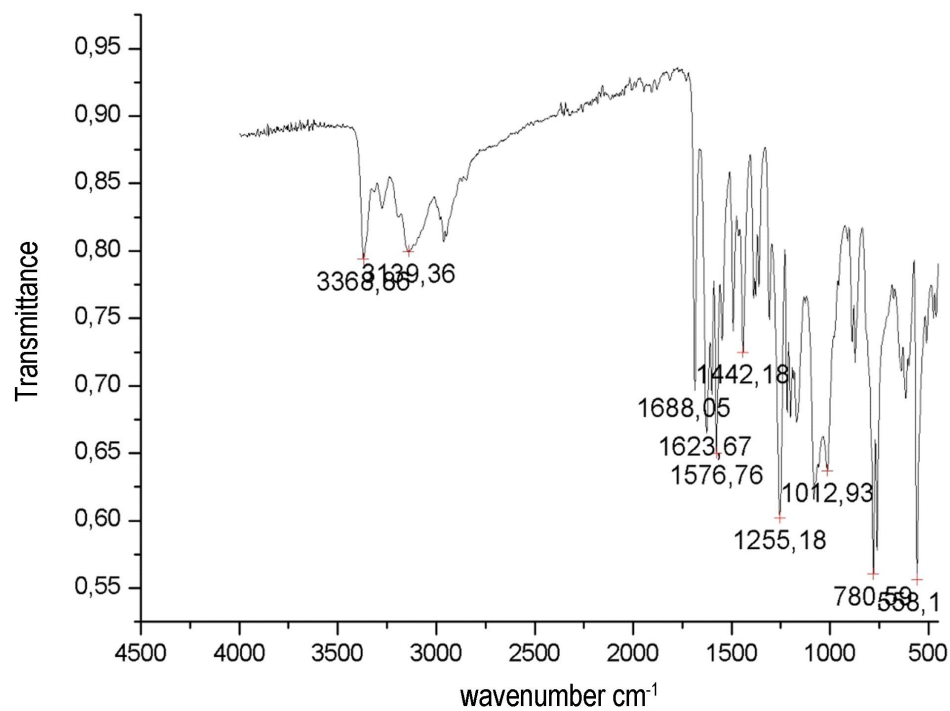

### <sup>1</sup>H NMR spectrum of **5c**

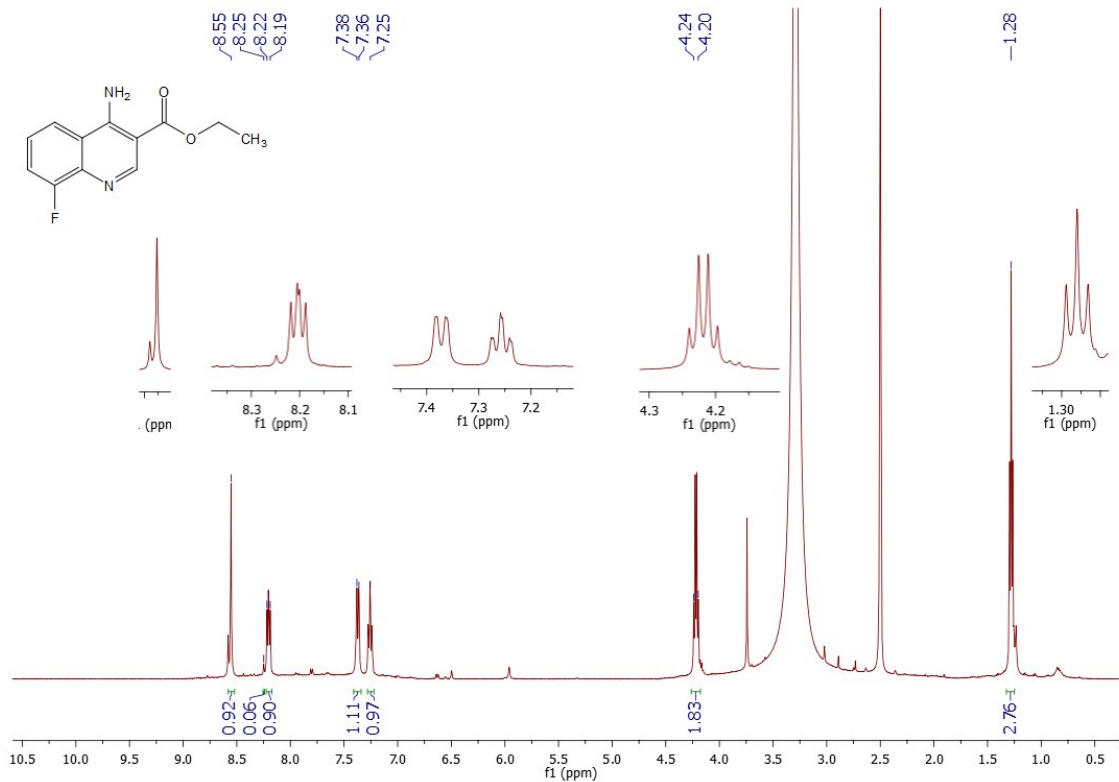



### APT $^{13}\text{C}$ NMR spectrum of **5c**

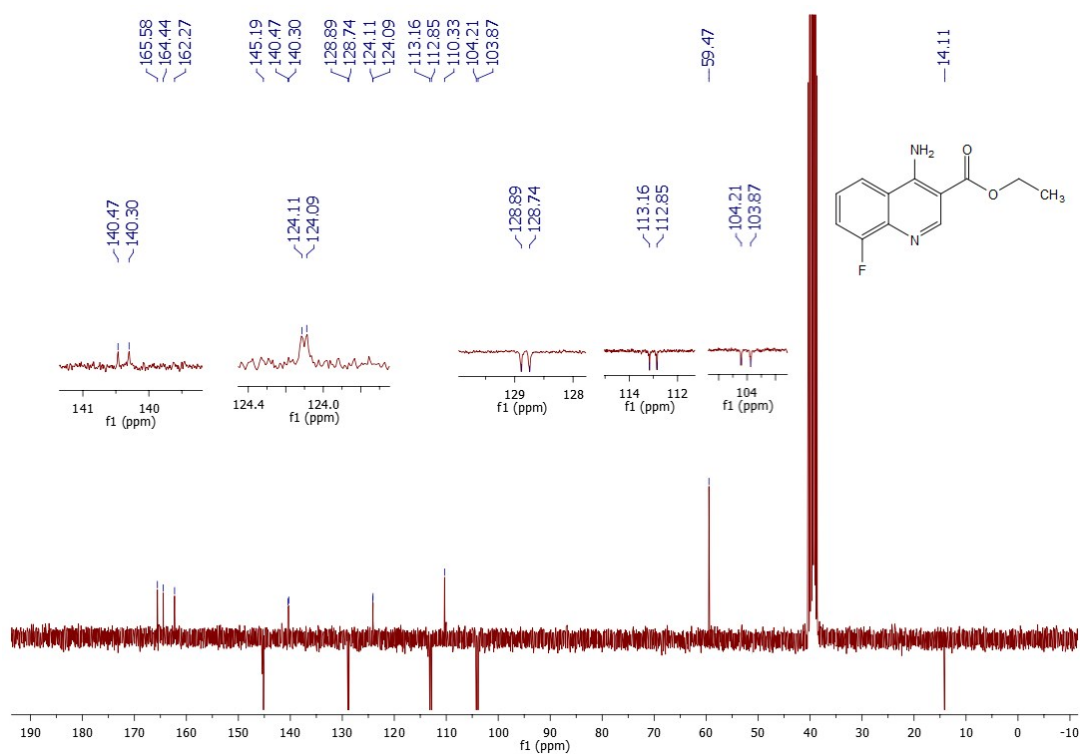

### IR spectrum of **5c**

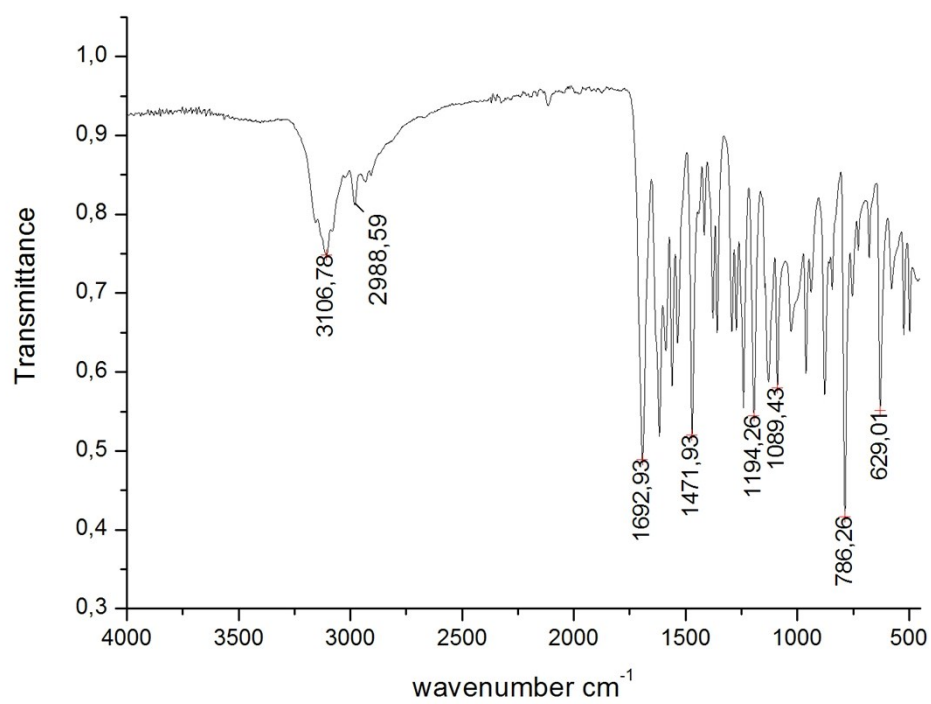

<sup>1</sup>H NMR spectrum of **6a**

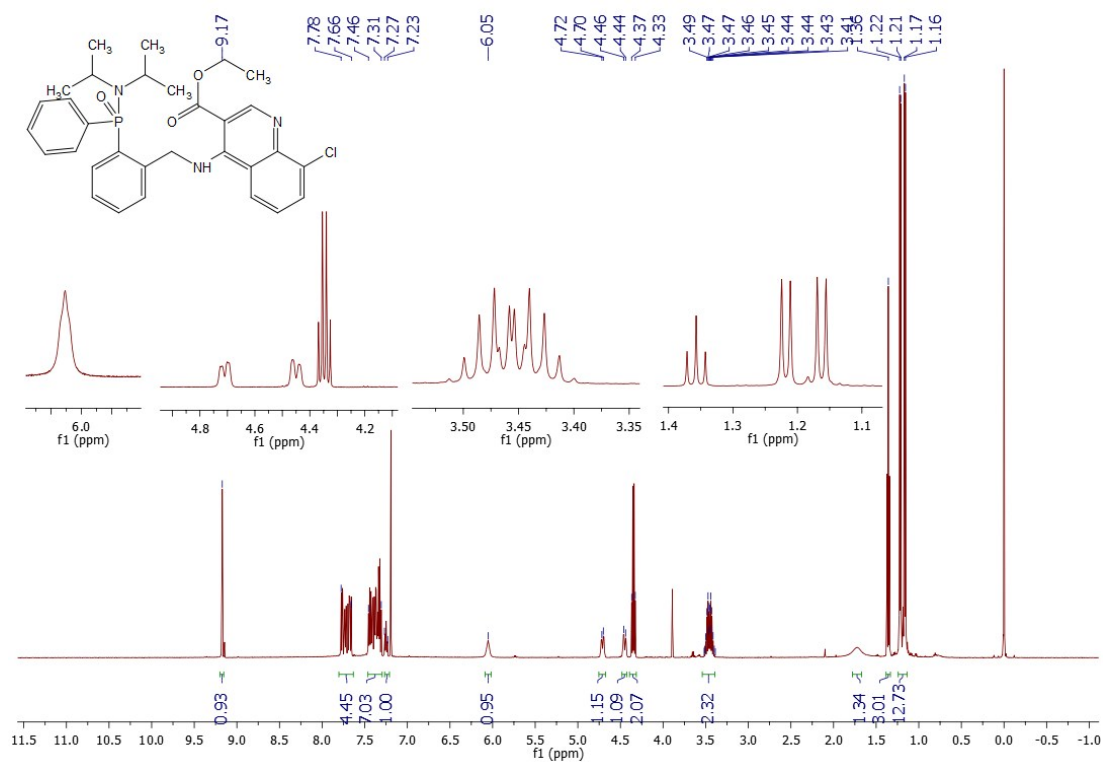

APT <sup>13</sup>C NMR spectrum of **6a**

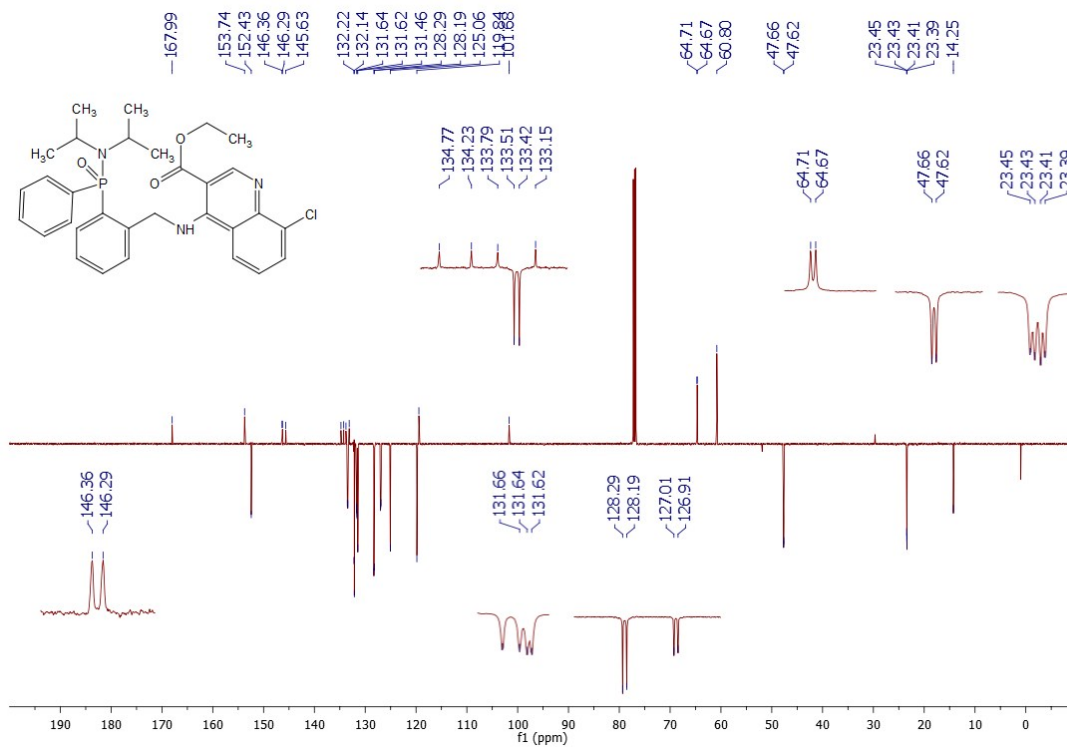

### $^{31}\text{P}$ NMR spectrum of **6a**

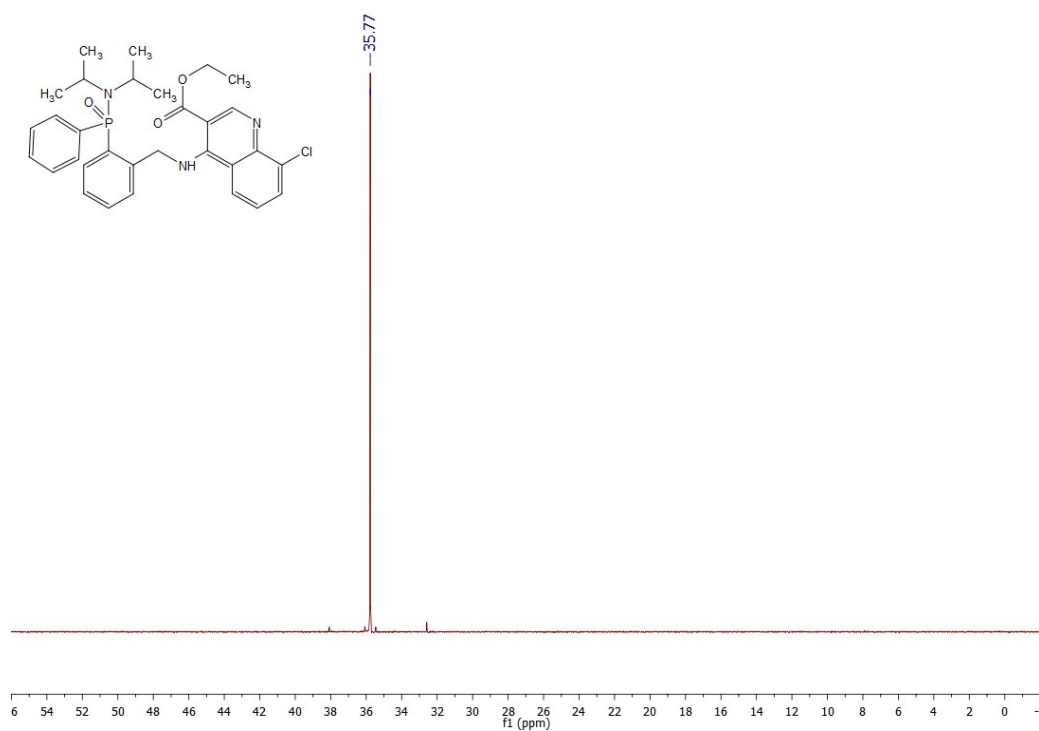

### $^1\text{H}$ NMR spectrum of **6b**

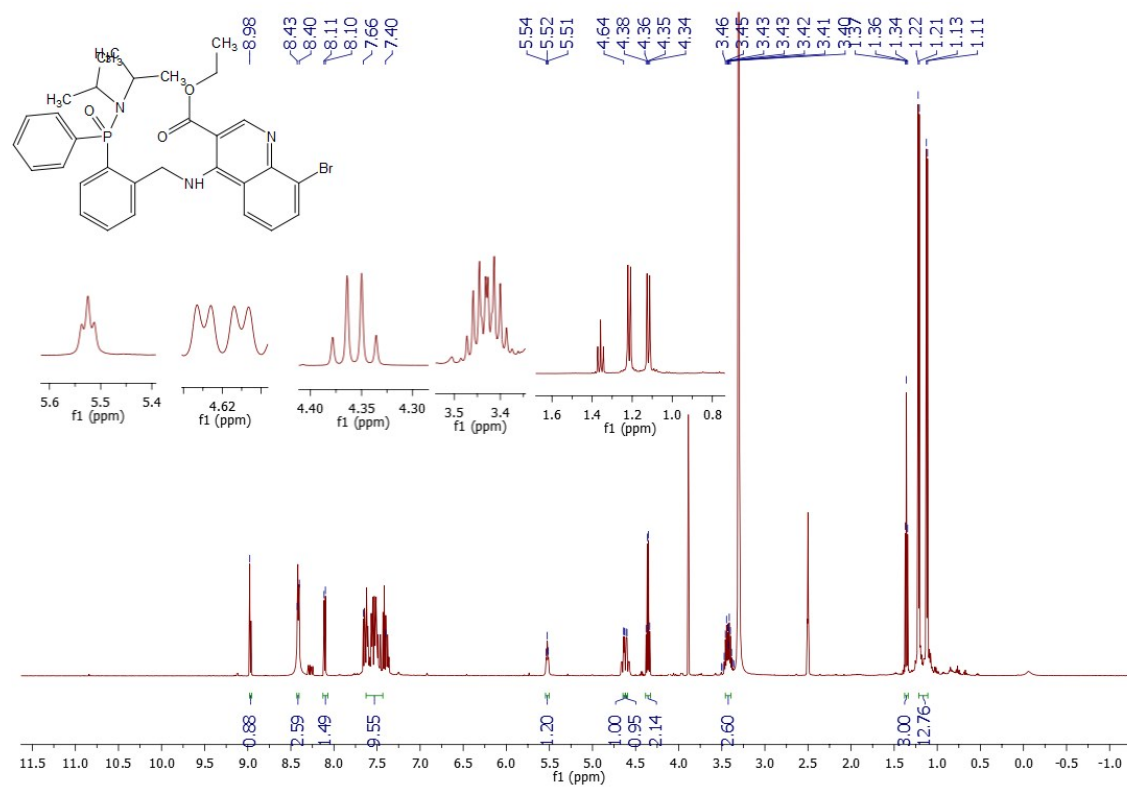

### APT $^{13}\text{C}$ NMR spectrum of **6b**

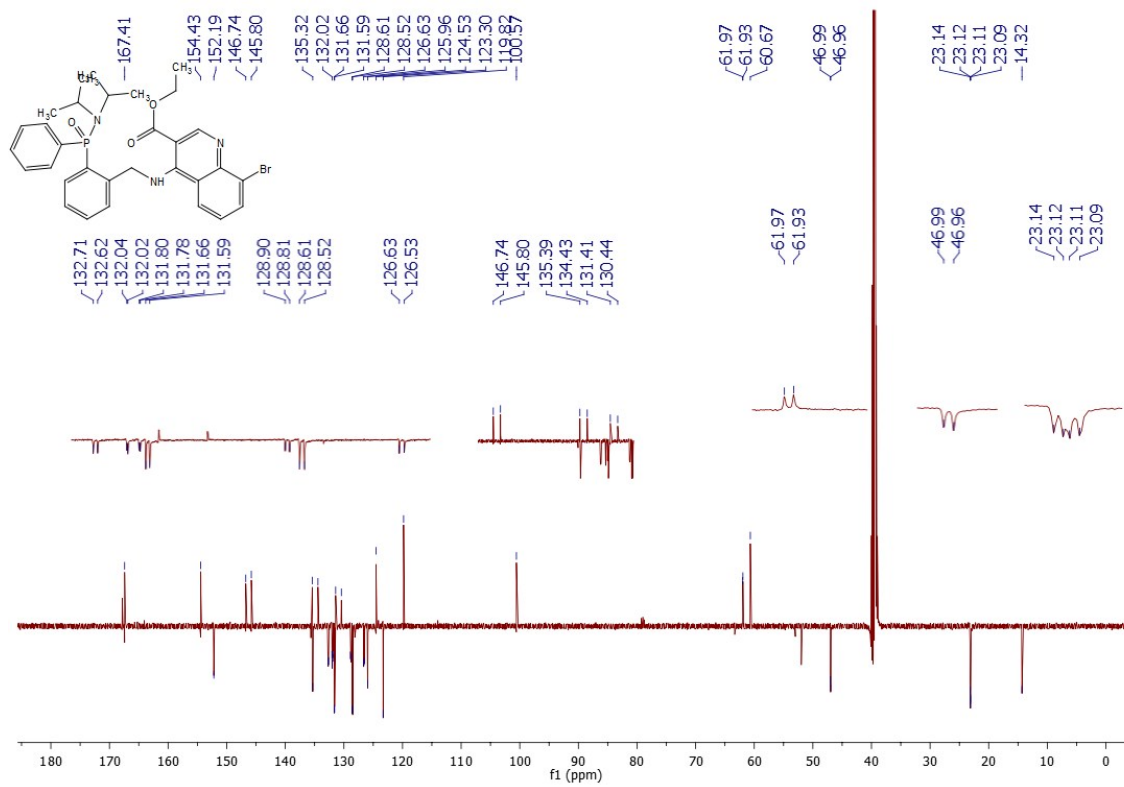

### $^{31}\text{P}$ NMR spectrum of **6b**

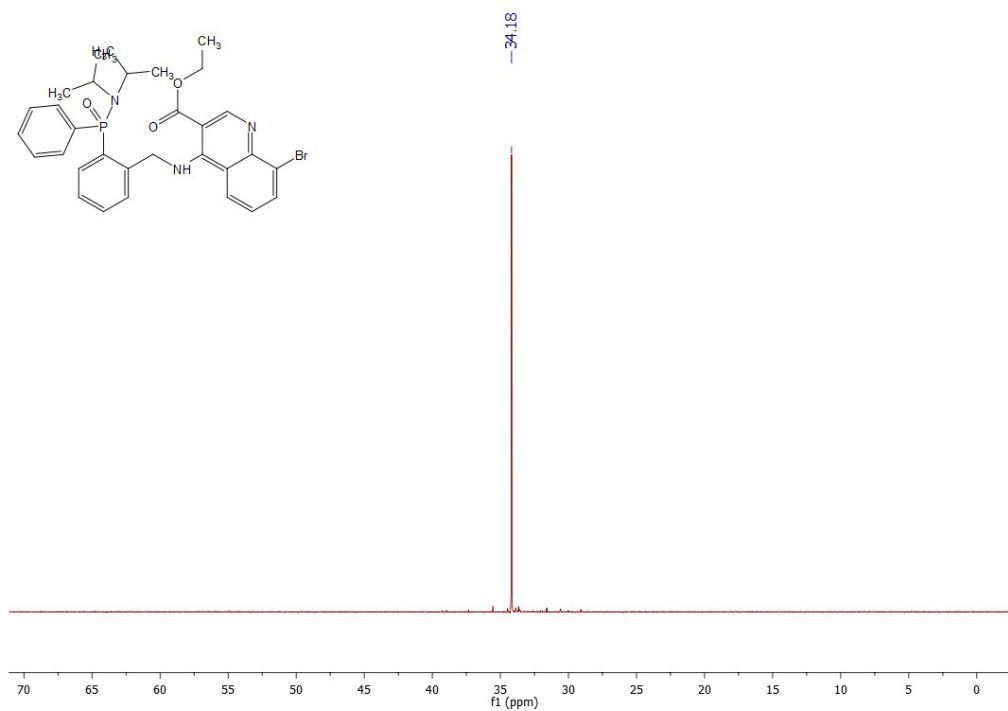

<sup>1</sup>H NMR spectrum of **6c**

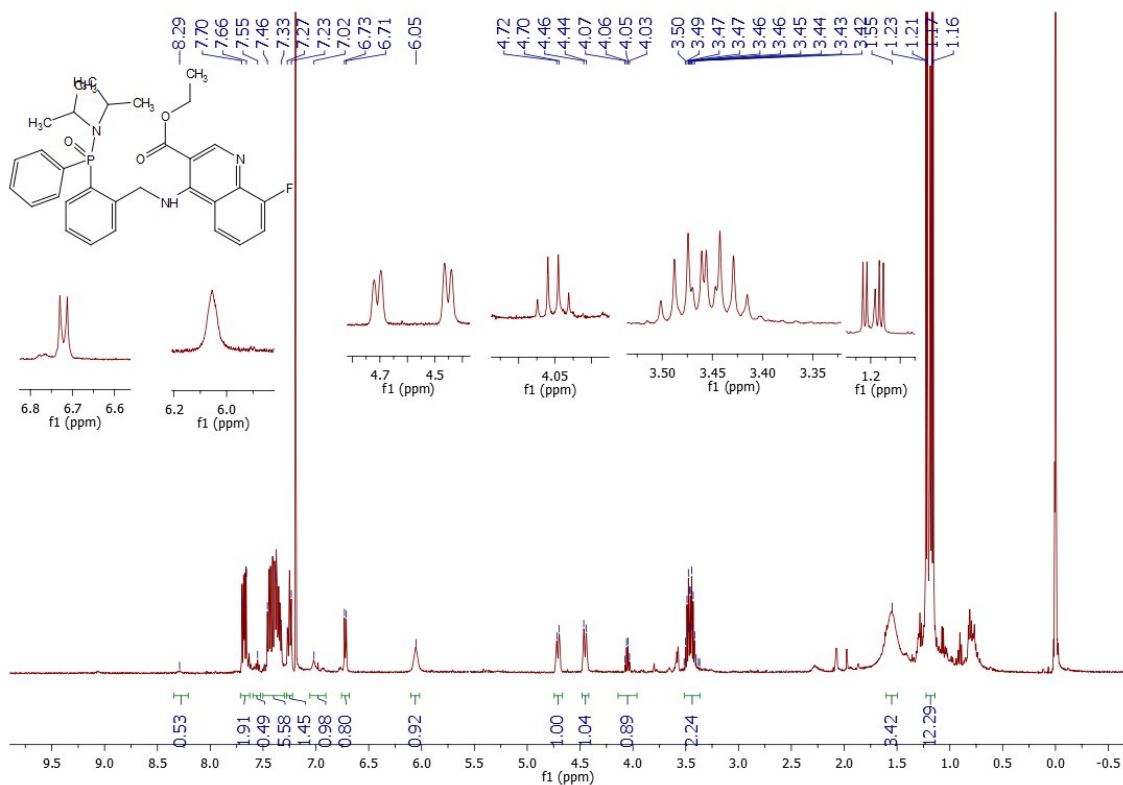

APT <sup>13</sup>C NMR spectrum of **6c**

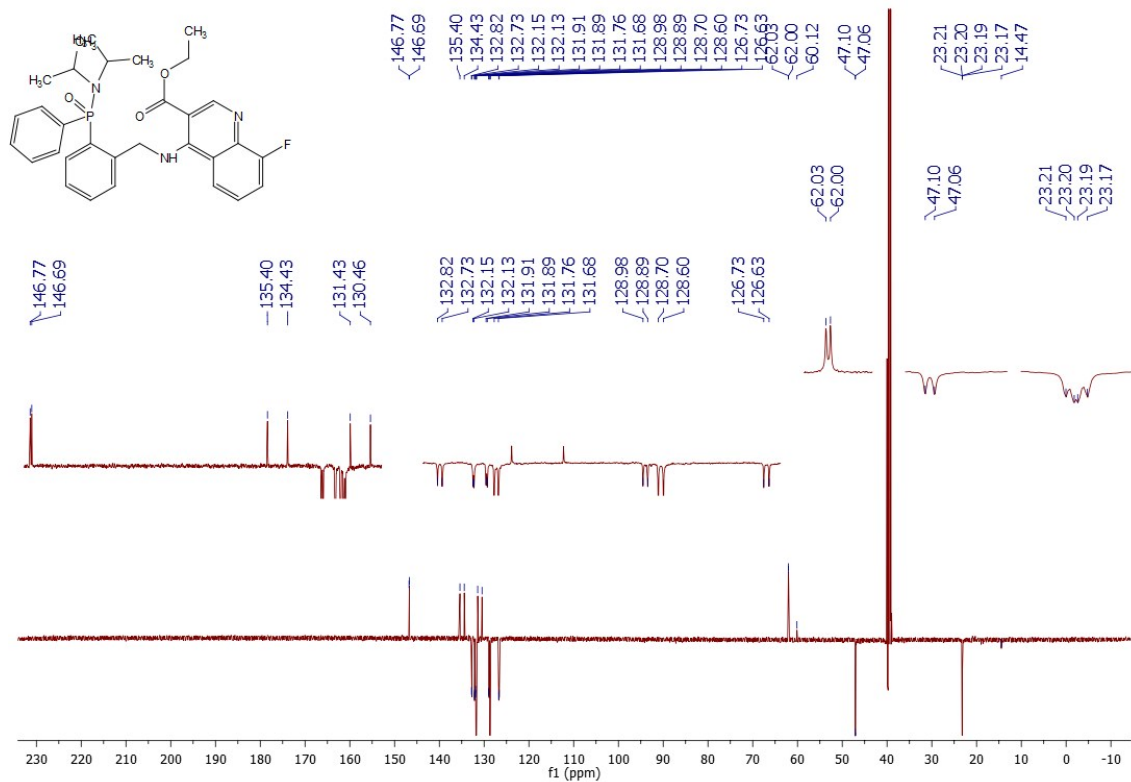

### $^{31}\text{P}$ NMR spectrum of **6c**

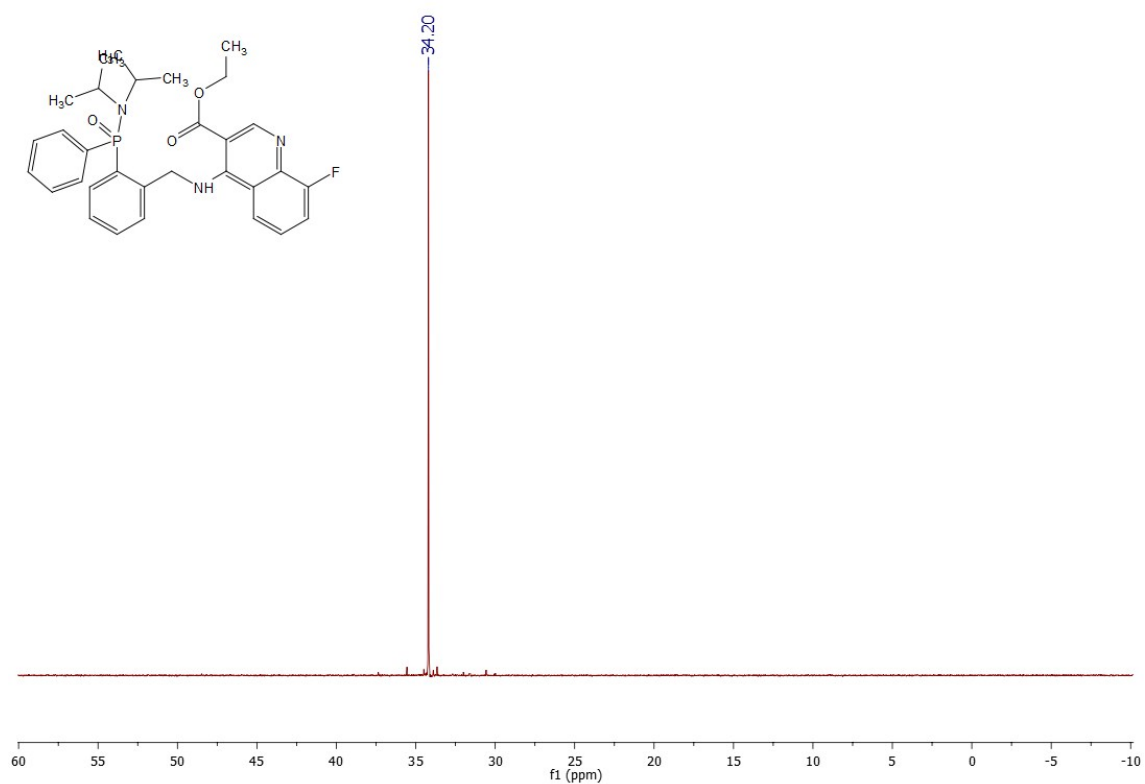

### $^1\text{H}$ NMR spectrum of **8a**

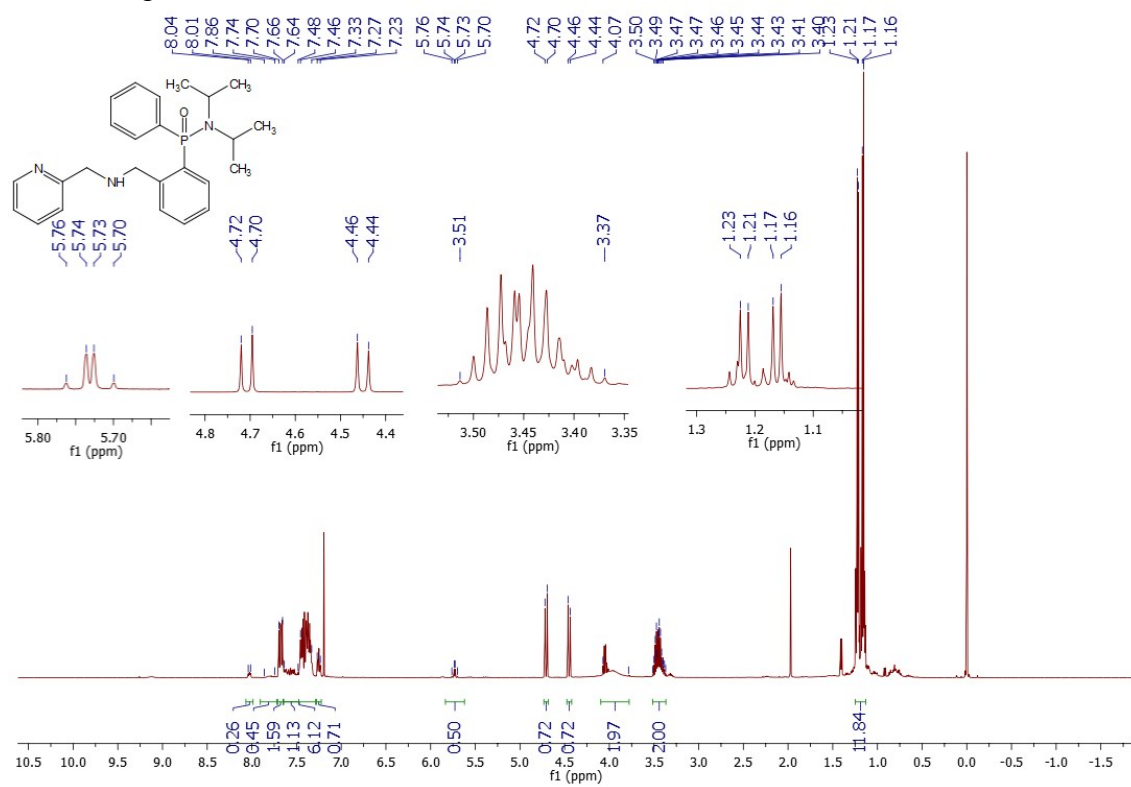

### $^{31}\text{P}$ NMR spectrum of **8a**

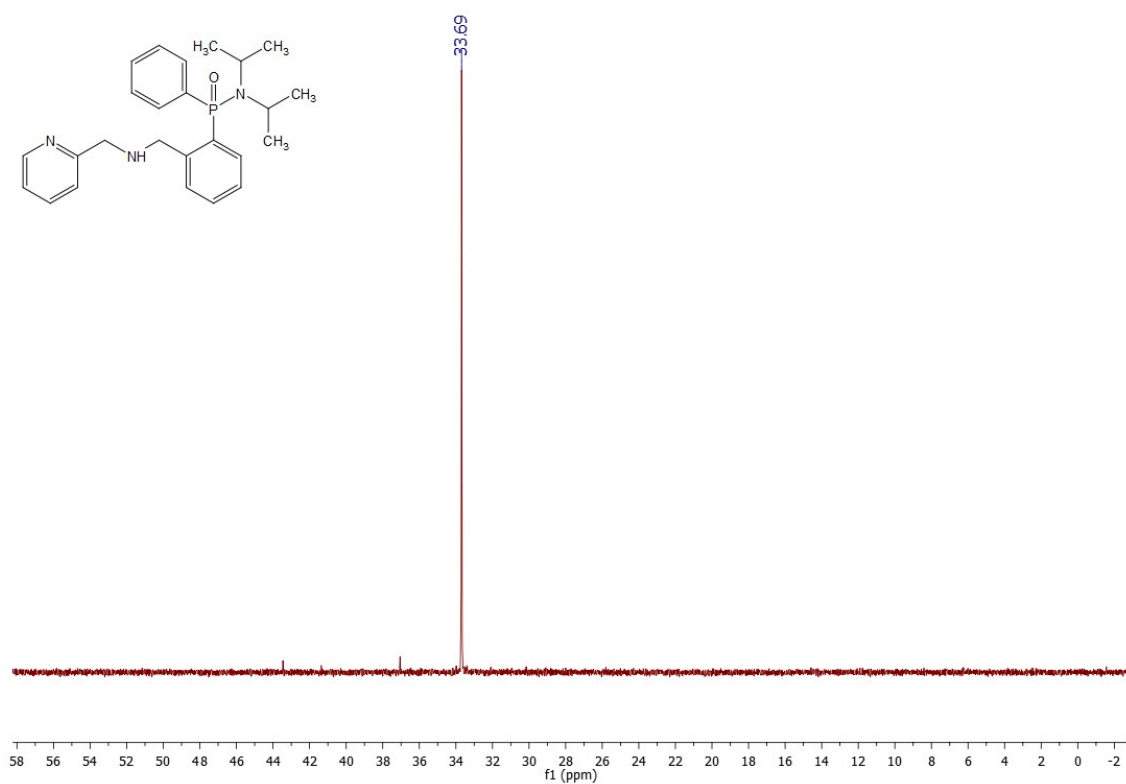

### $^1\text{H}$ NMR spectrum of **8b**

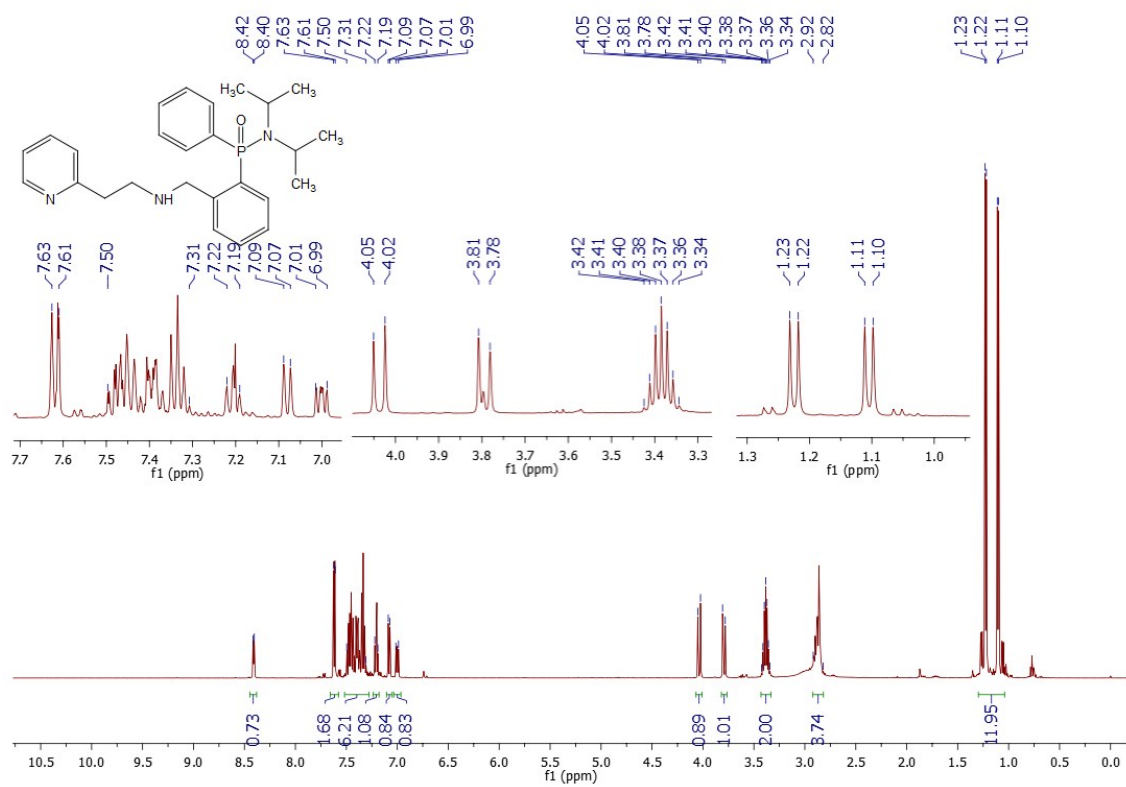

### $^{31}\text{P}$ NMR spectrum of **8b**

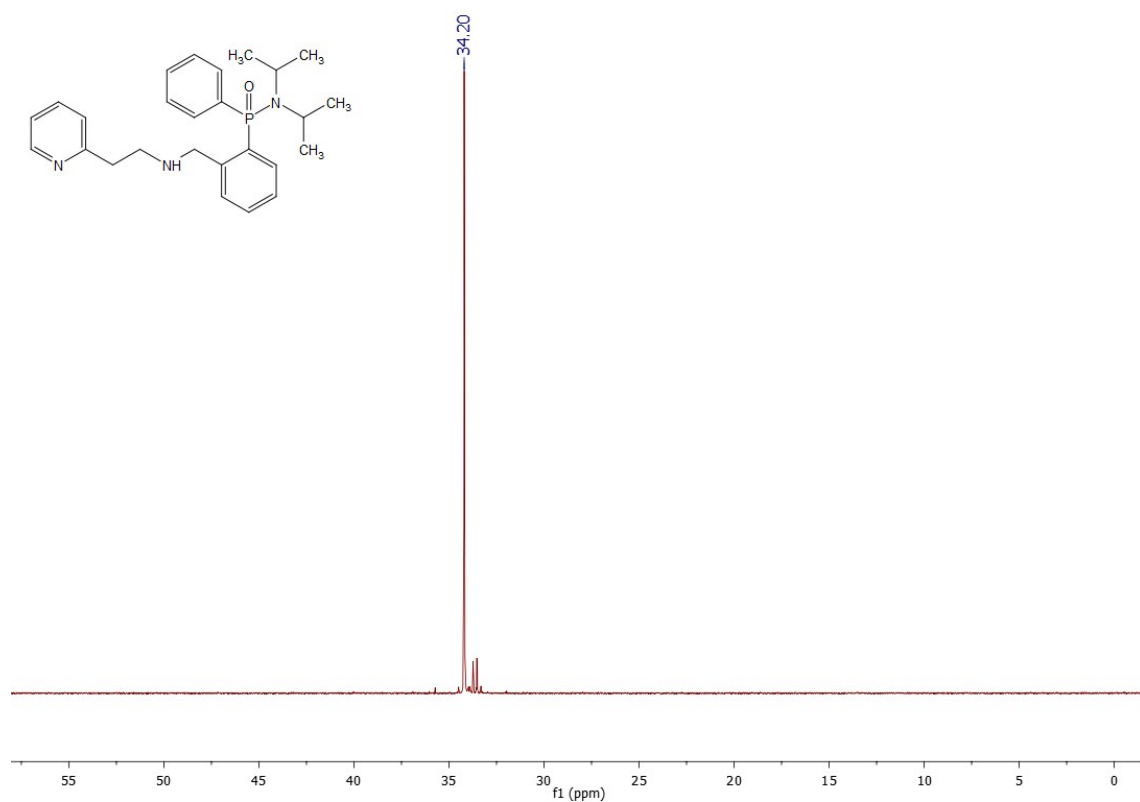

### $^1\text{H}$ NMR spectrum of **11a**

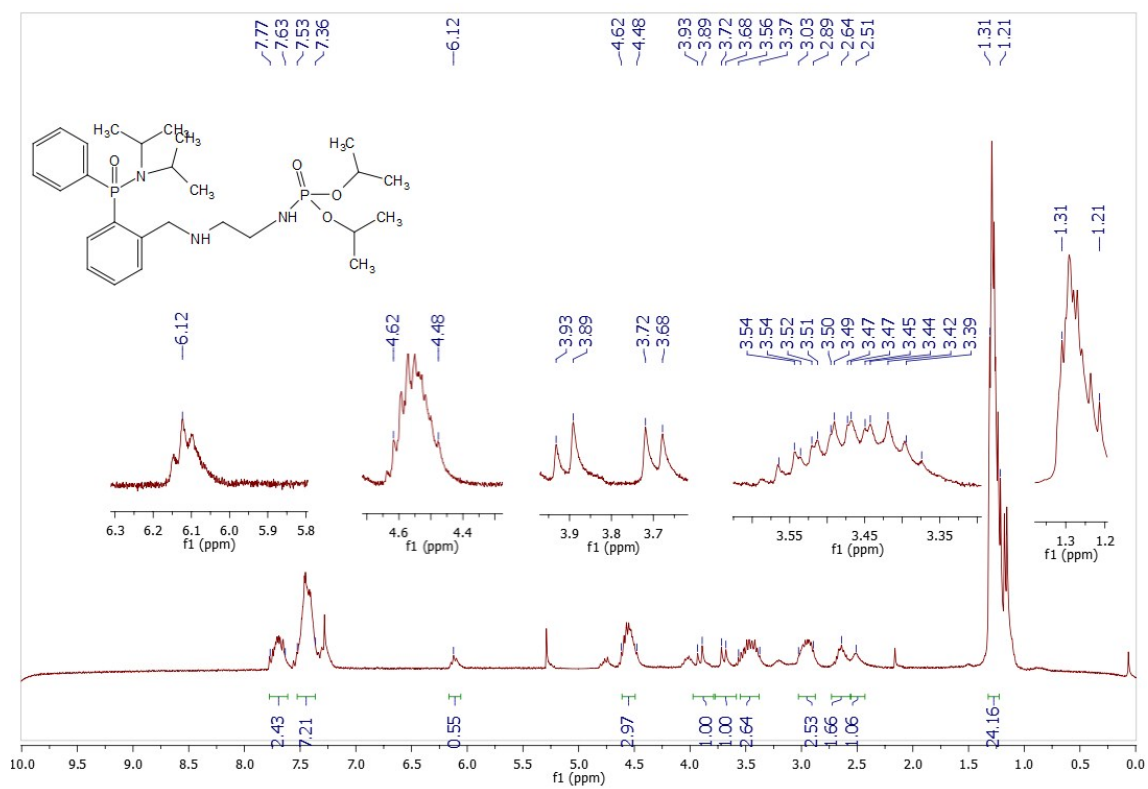



### $^{31}\text{P}$ NMR spectrum of **11a**

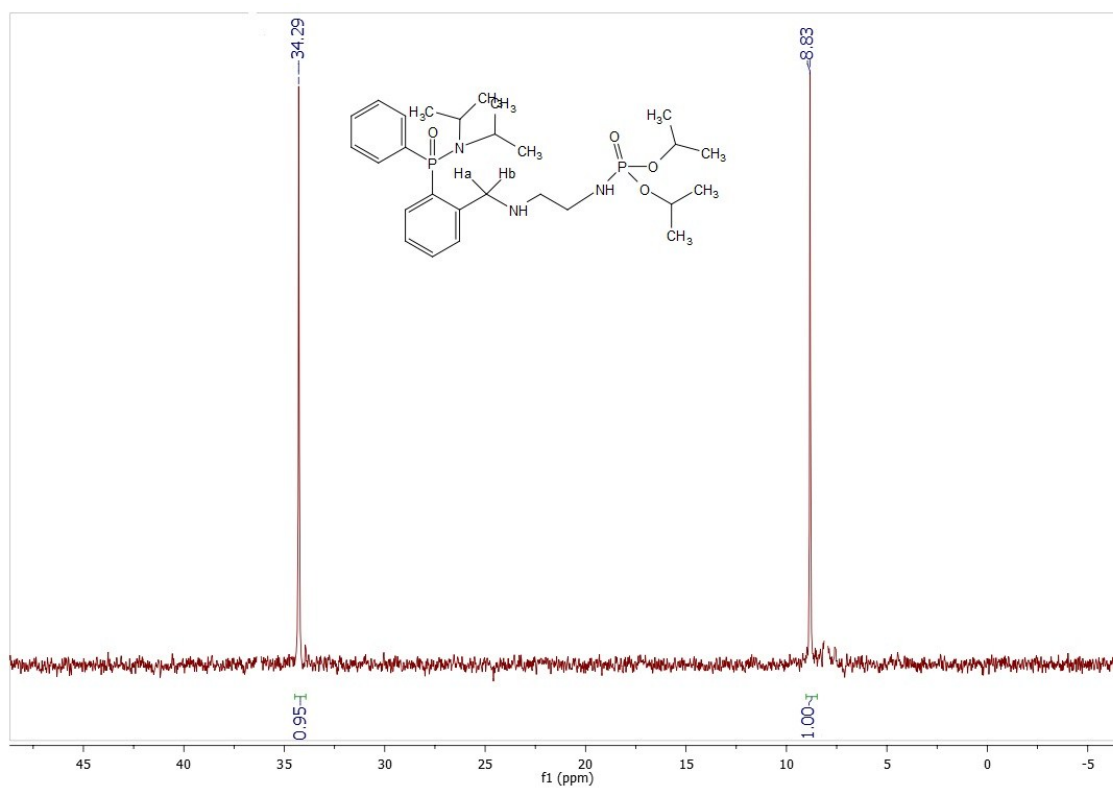

### $^1\text{H}$ NMR spectrum of **11b**

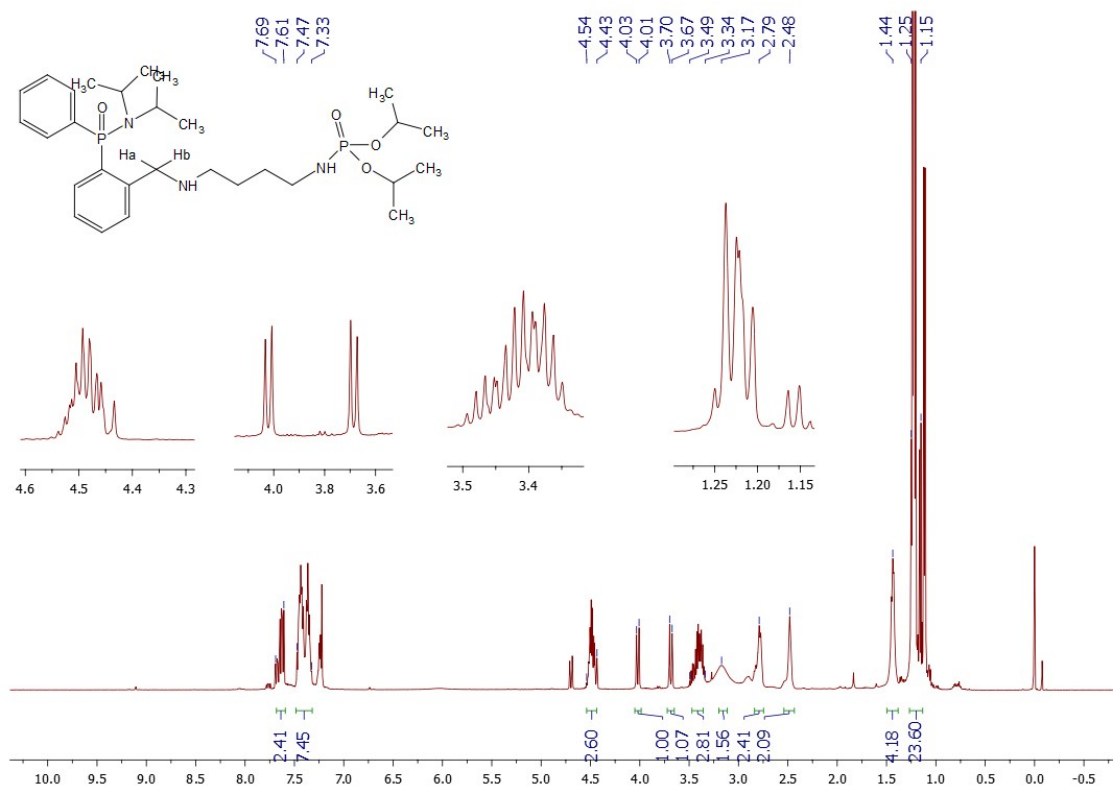

### $^{31}\text{P}$ NMR spectrum of **11b**

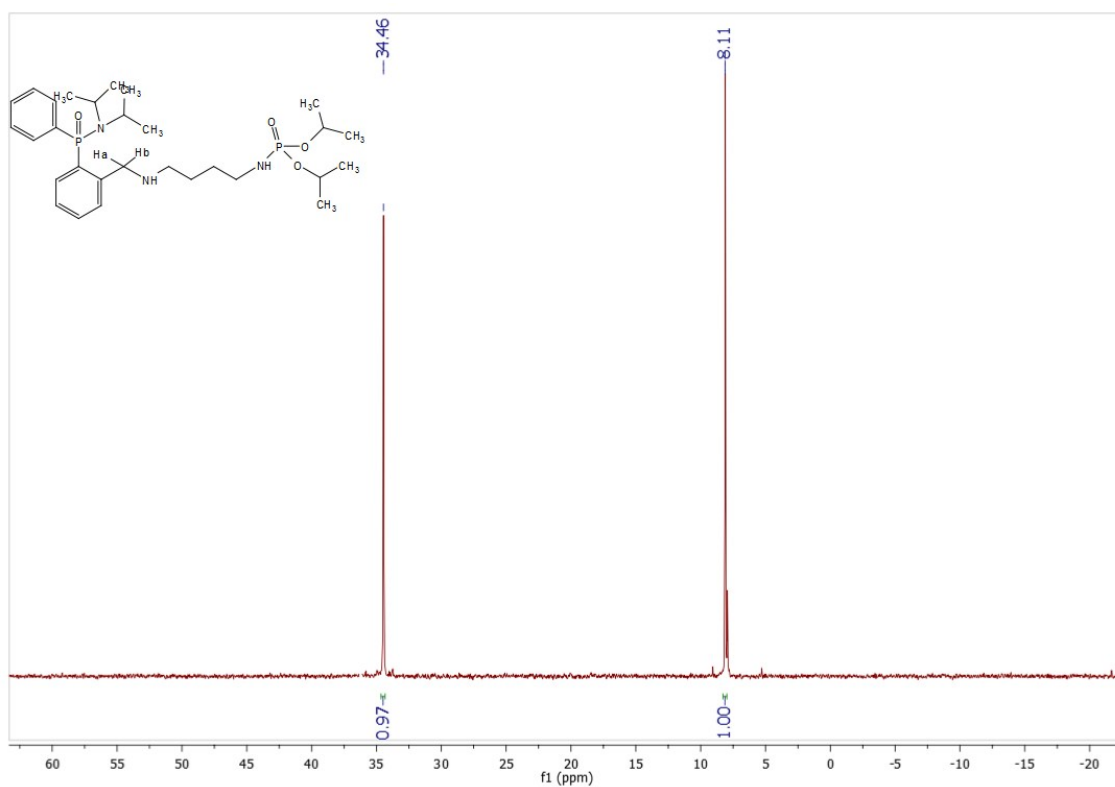

### APT $^{13}\text{C}$ NMR spectrum of **11b**

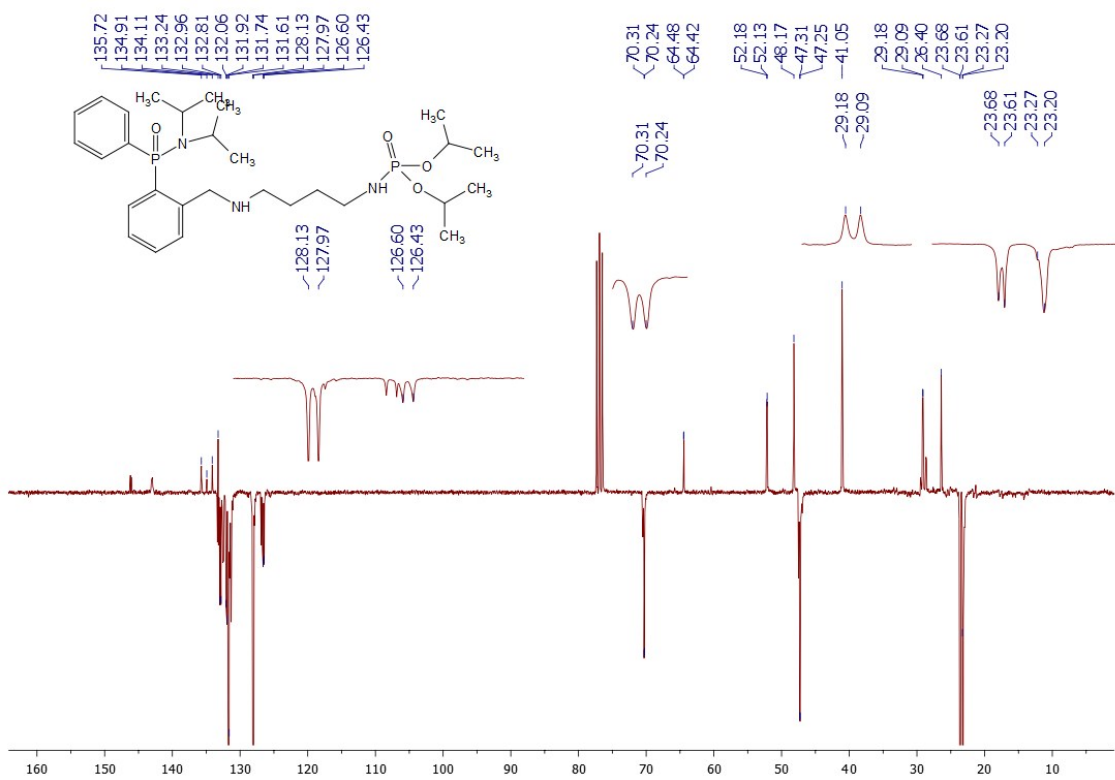

## HRMS (ESI) spectrum of **11b**

f26cm51

03-05-07 (0.030) Is (1.00,1.00) C<sub>29</sub>H<sub>50</sub>N<sub>3</sub>O<sub>4</sub>P<sub>2</sub>

1: TOF MS ES+  
7.06e12

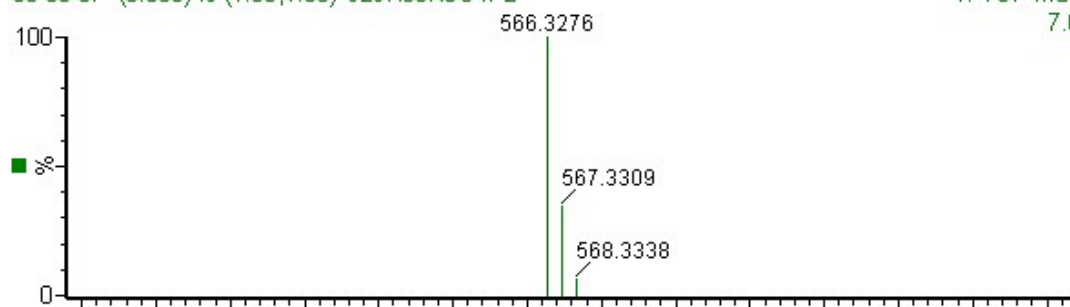

03-05-07 336 (1.270) Cm (336-49:239)

1: TOF MS ES+  
3.08e4

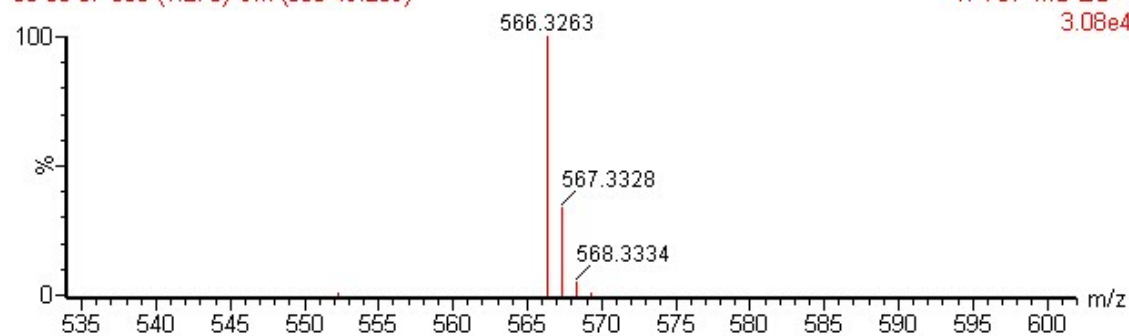

## <sup>1</sup>H NMR spectrum of **11c**

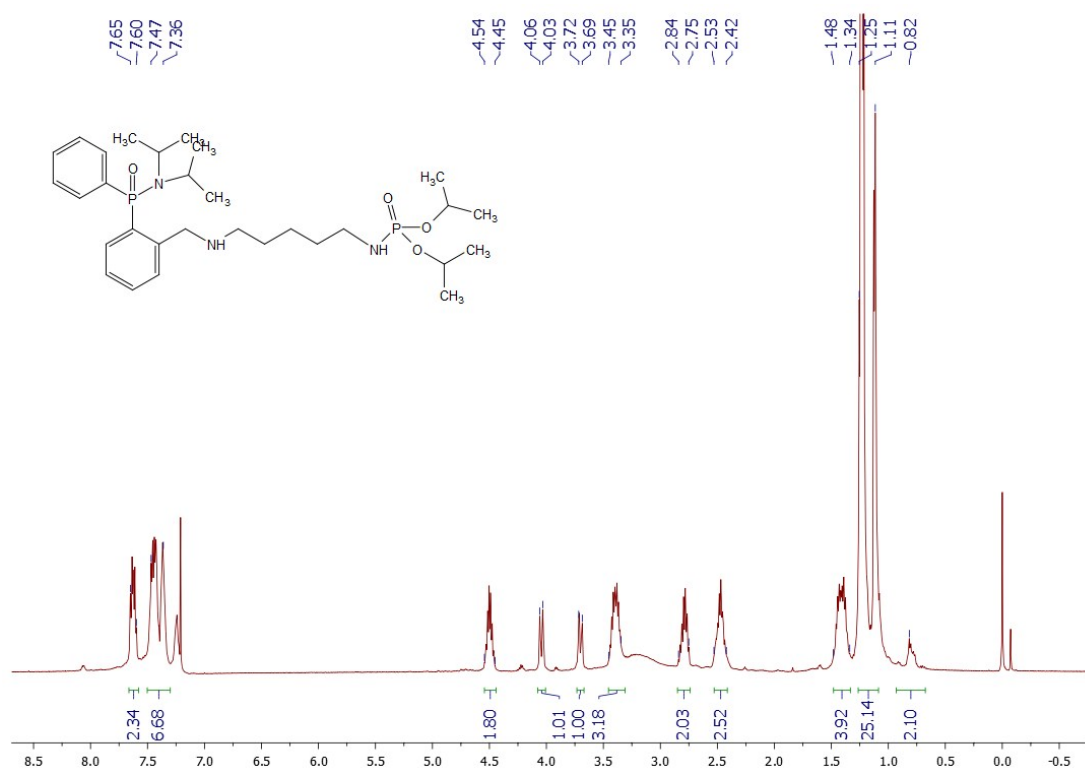

### APT $^{13}\text{C}$ NMR spectrum of **11c**

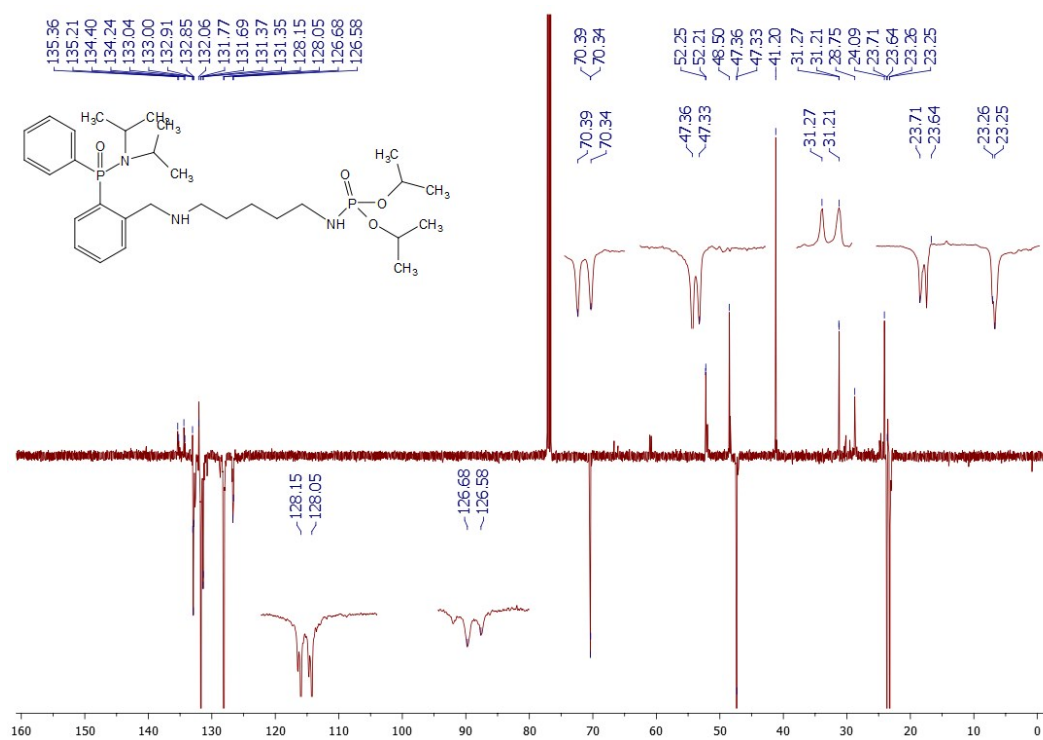

### $^{31}\text{P}$ NMR spectrum of **11c**

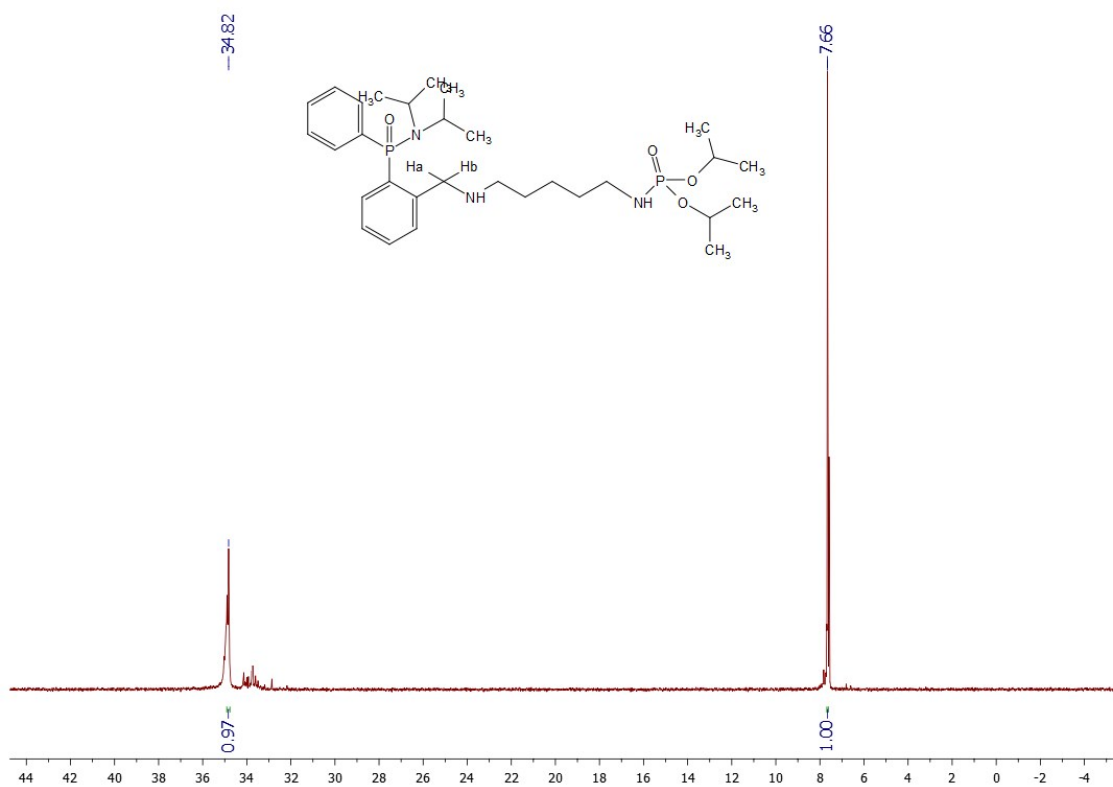

# HRMS (ESI) spectrum of 11c

f26cm50

03-05-06 (0.030) Is (1.00,1.00) C<sub>30</sub>H<sub>52</sub>N<sub>3</sub>O<sub>4</sub>P<sub>2</sub>

1: TOF MS ES+  
6.98e12

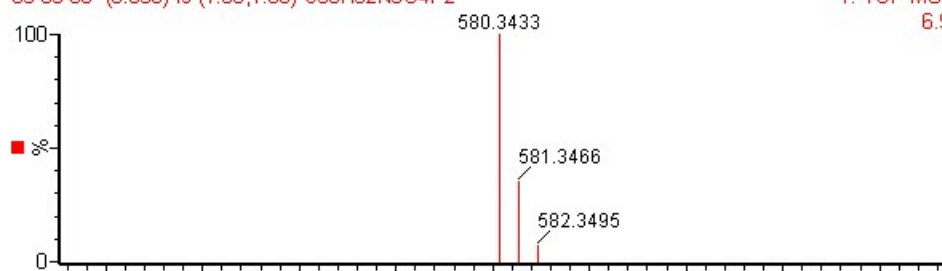

03-05-06 342 (1.302) Cm (342-200:218)

1: TOF MS ES+  
3.06e4

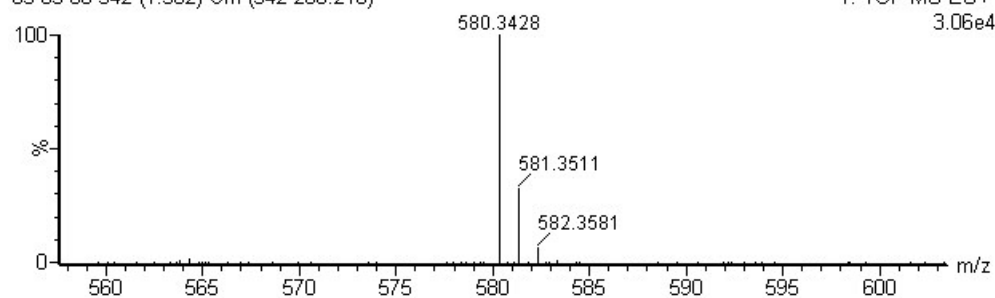

f26cm50

03-05-06 342 (1.302) Cm (342-200:218)

1: TOF MS ES+  
3.06e4

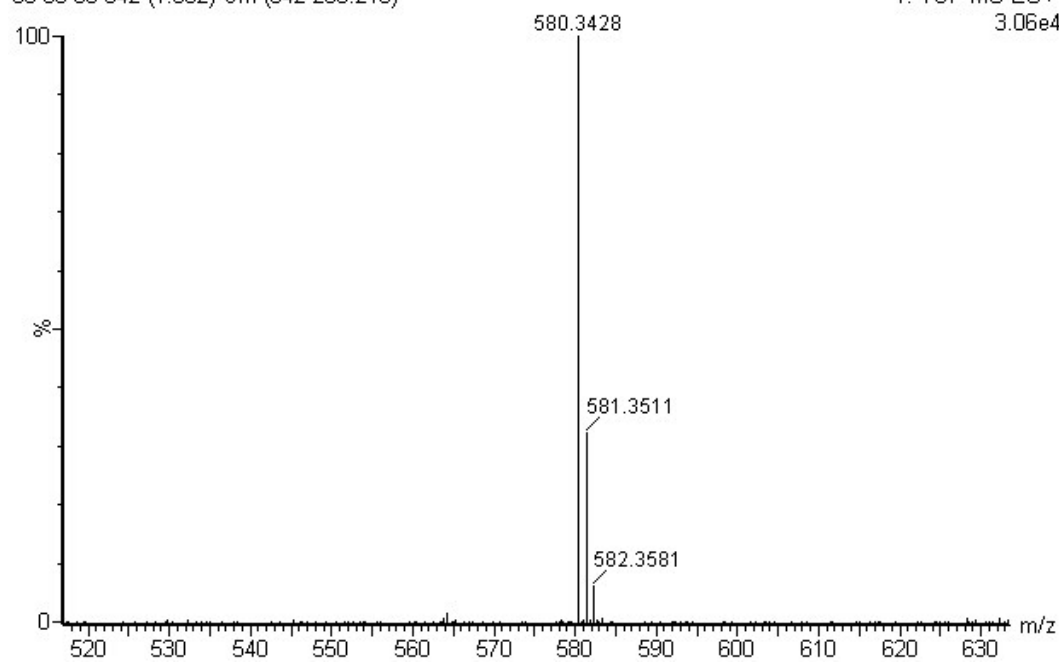

### <sup>1</sup>H NMR spectrum of **11d**

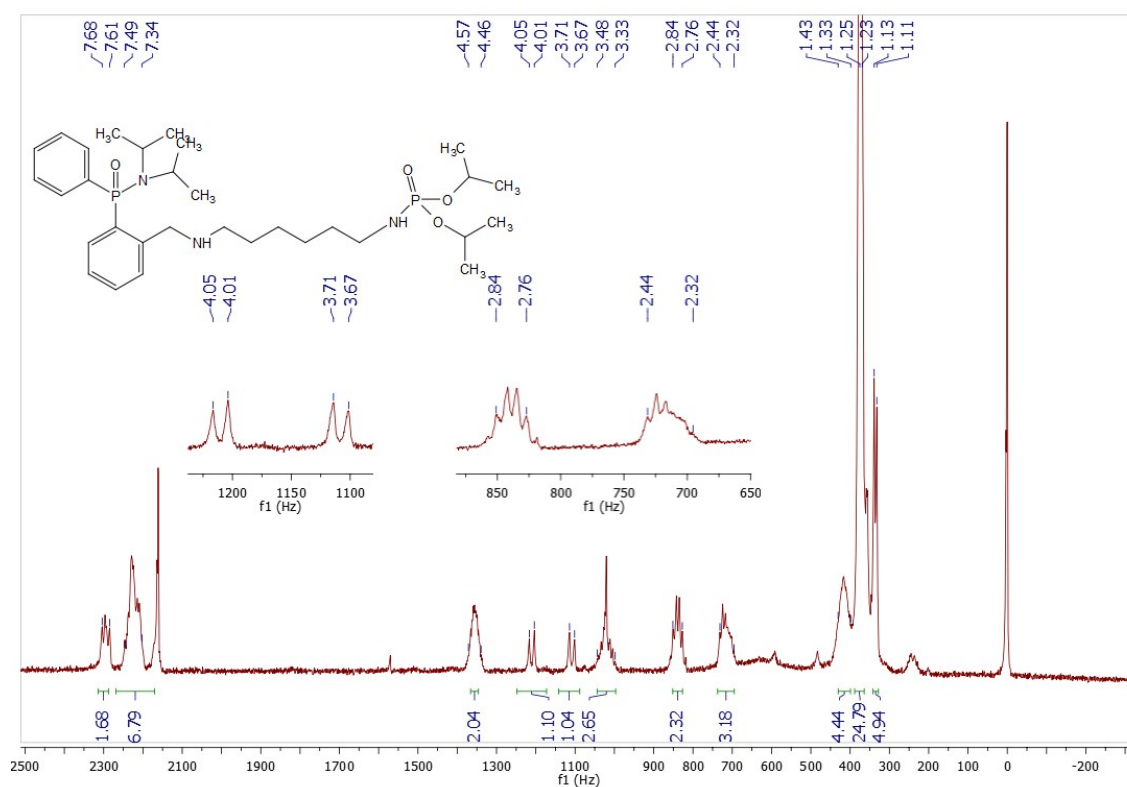

### APT <sup>13</sup>C NMR spectrum of **11d**

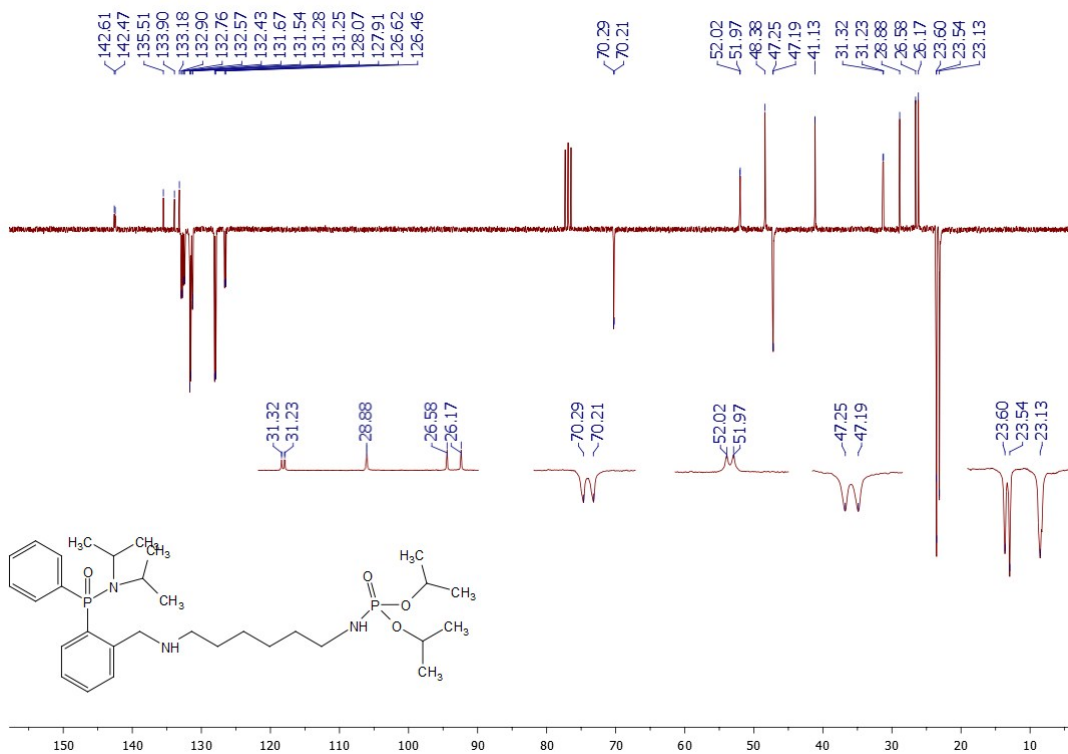

### $^{31}\text{P}$ NMR spectrum of **11d**

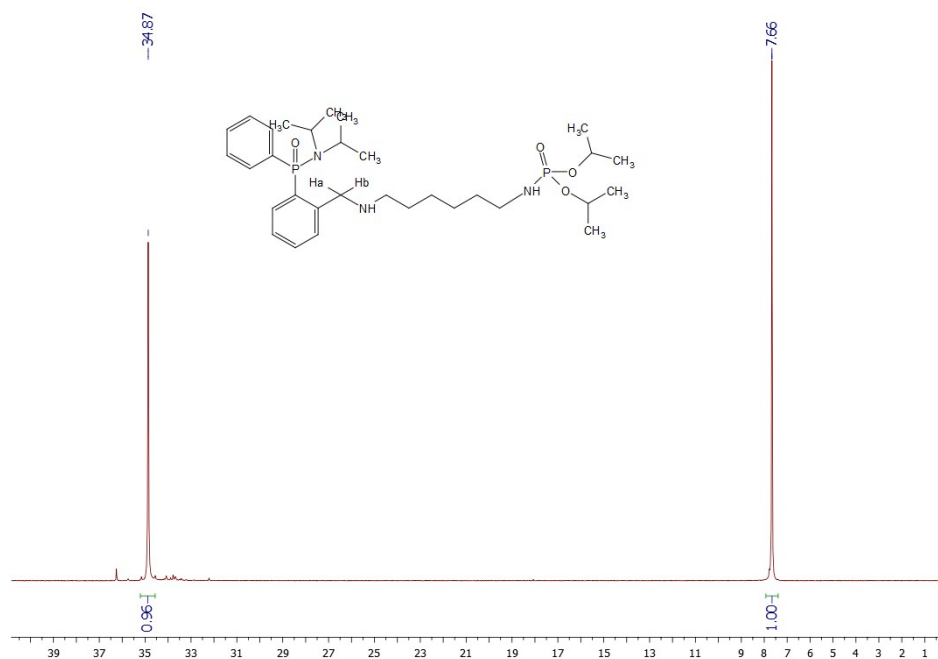

### HRMS (ESI) spectrum of **11d**

N20CM27

12-21-02 (0.030) Is (1.00,1.00) C<sub>31</sub>H<sub>54</sub>N<sub>3</sub>O<sub>4</sub>P<sub>2</sub>

1: TOF MS ES+  
6.90e12

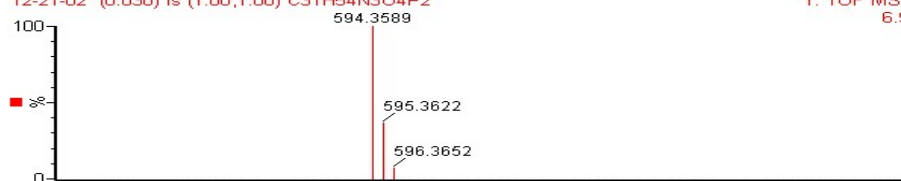

12-21-02 364 (1.379) Cm (361:365-22:60)

1: TOF MS ES+  
1.22e5

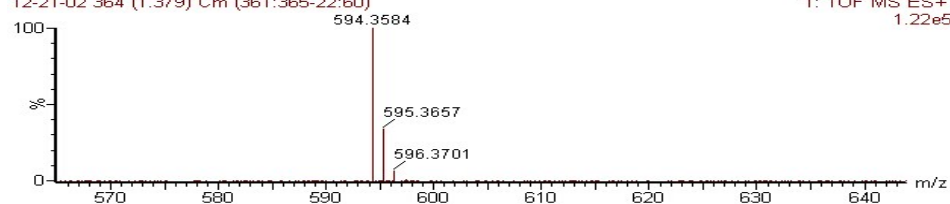

N20CM27

12-21-02 364 (1.379) Cm (361:365-22:60)

1: TOF MS ES+  
1.22e5

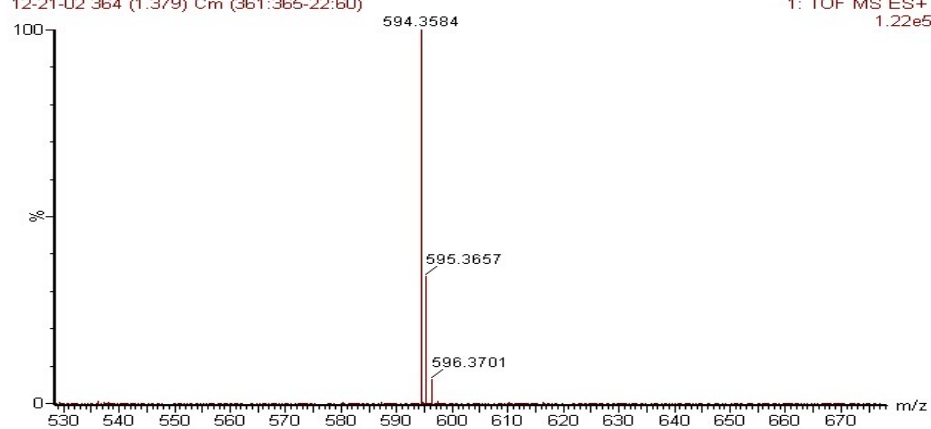

<sup>1</sup>H NMR spectrum of **13a**

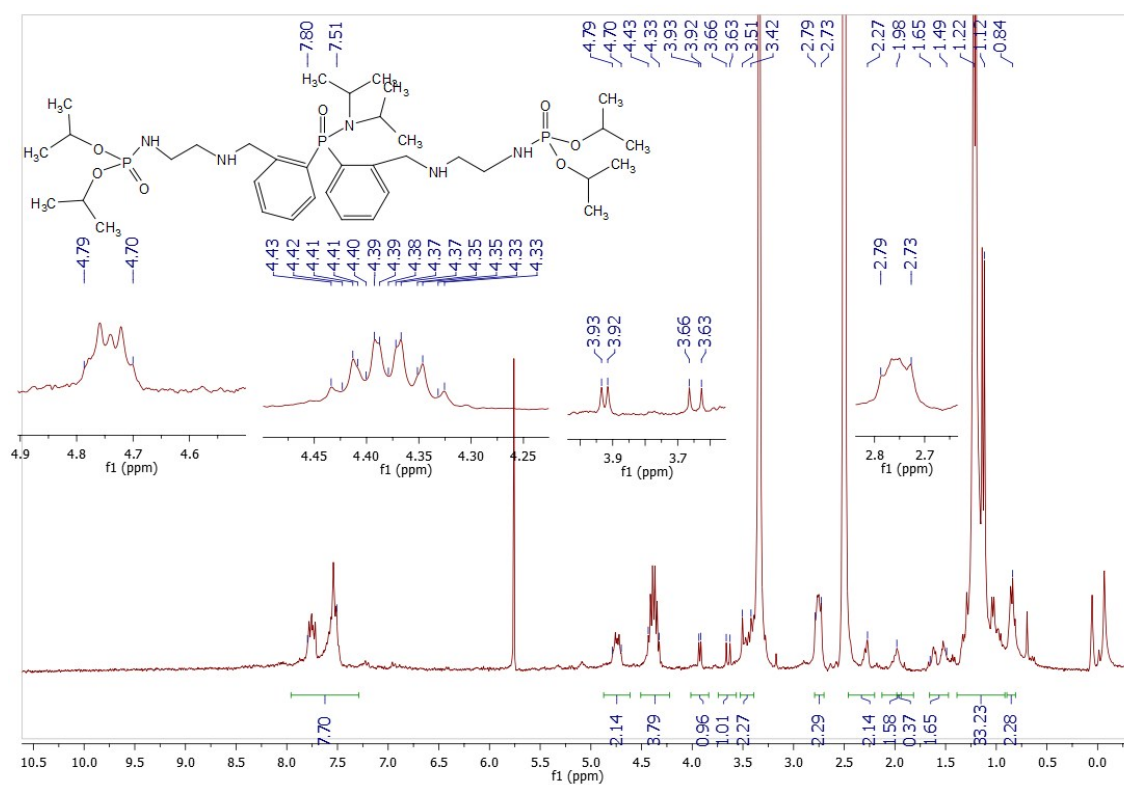

<sup>13</sup>C NMR spectrum of **13a**

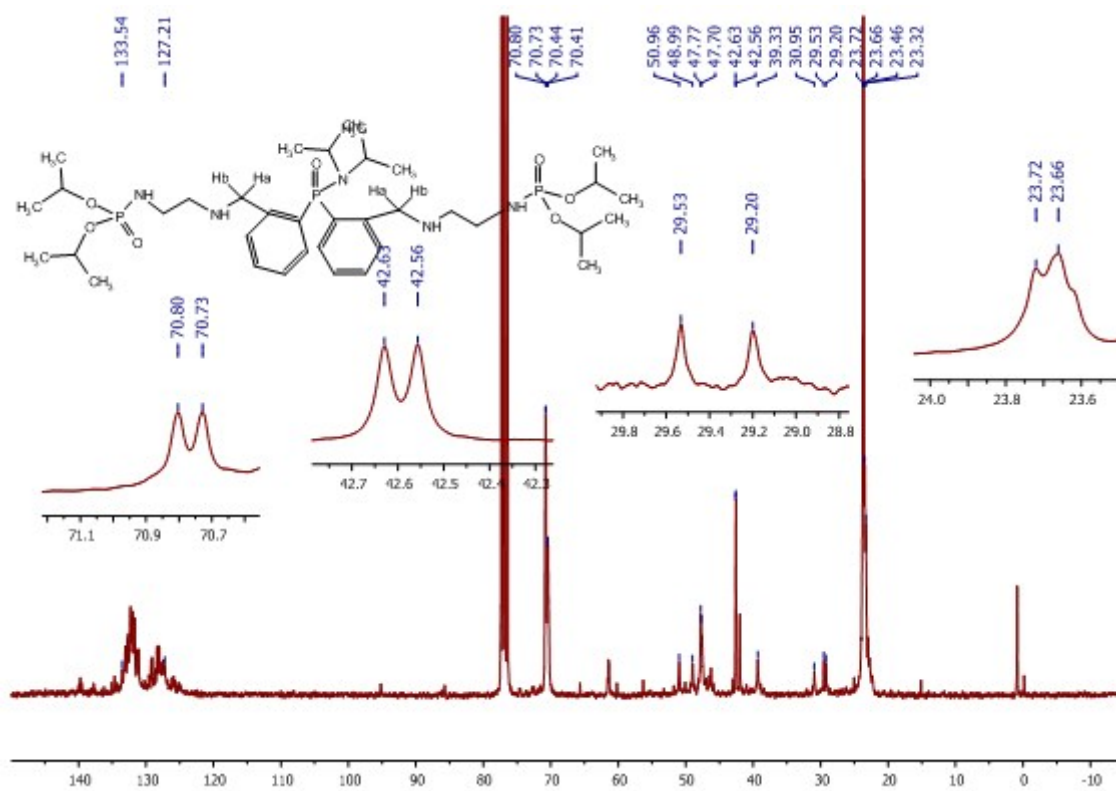



### $^{31}\text{P}$ NMR spectrum of **13a**

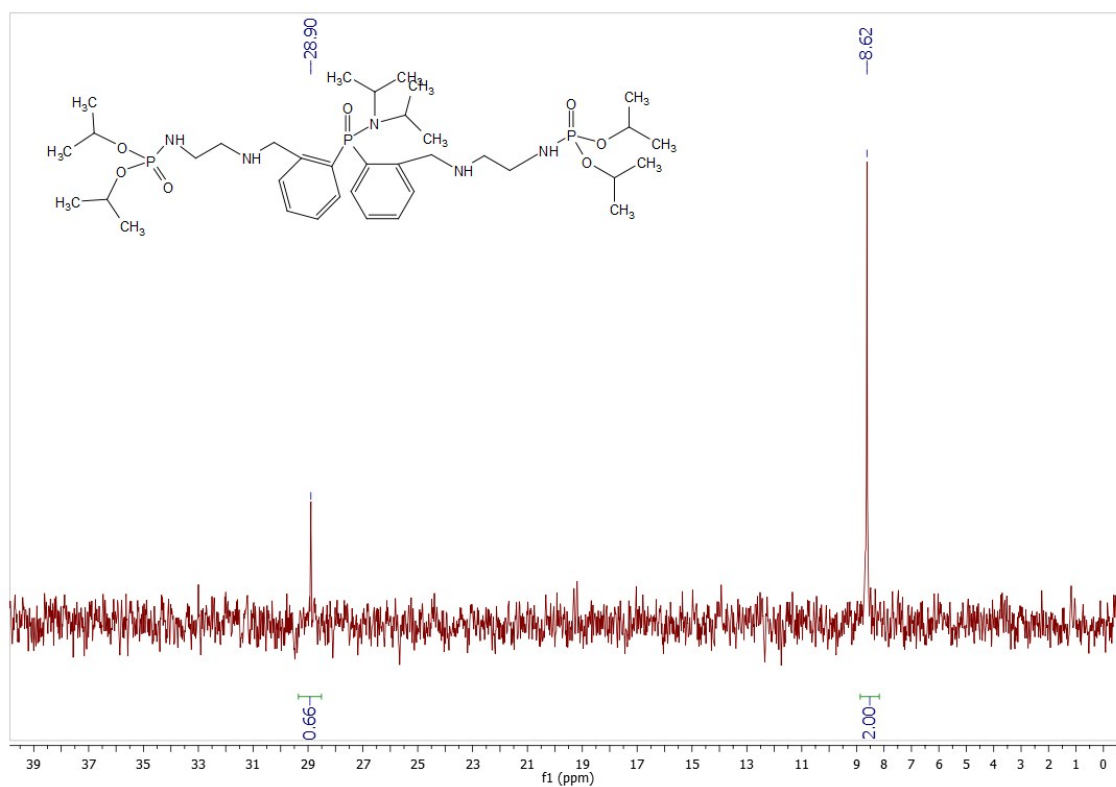

### $^1\text{H}$ NMR spectrum of **13b**

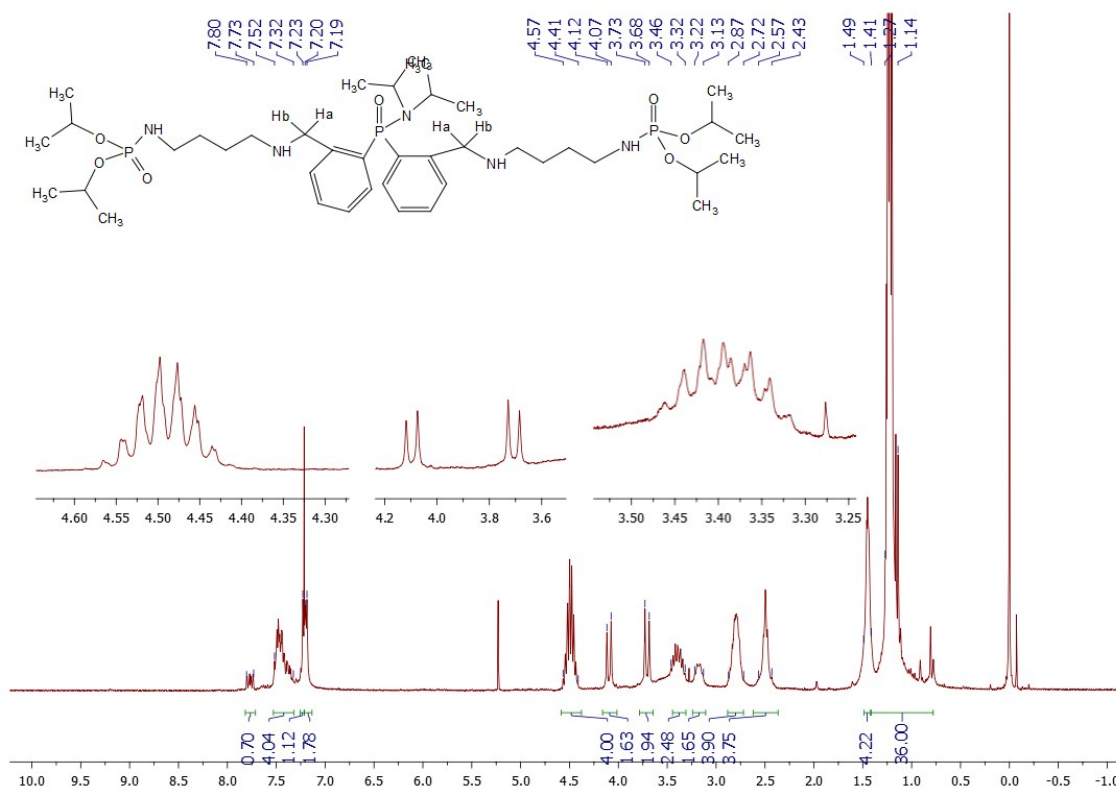

<sup>13</sup>C NMR spectrum of **13b**

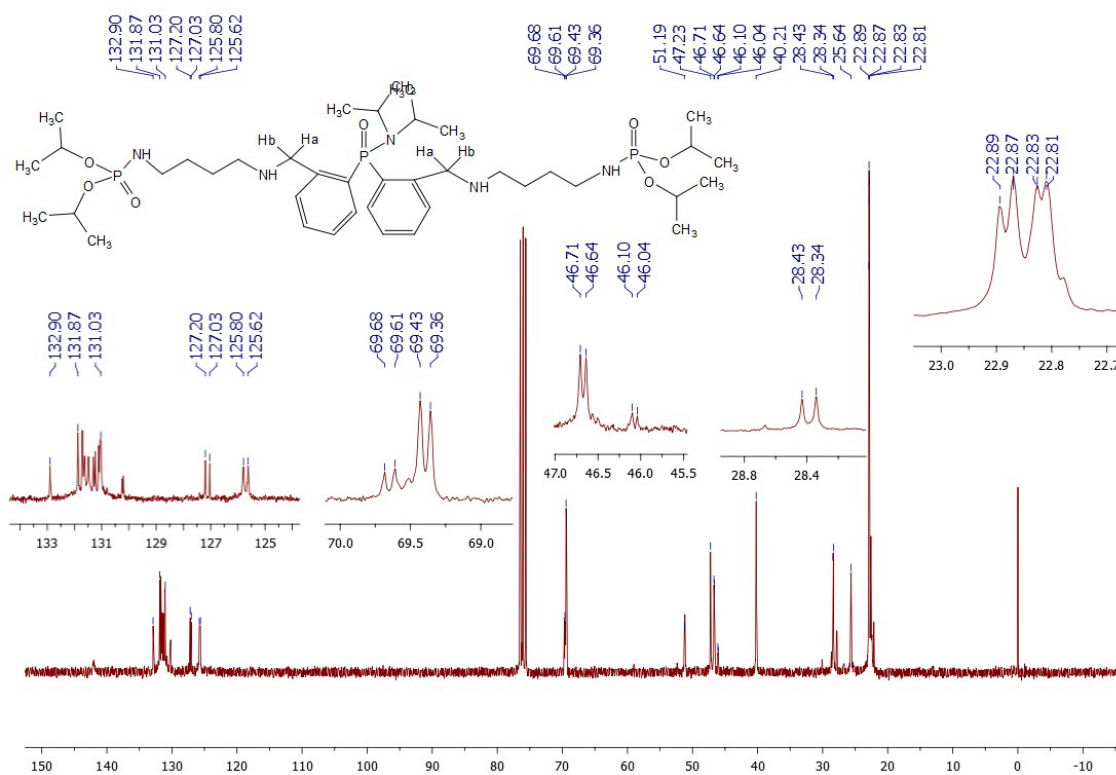

<sup>31</sup>P NMR spectrum of **13b**

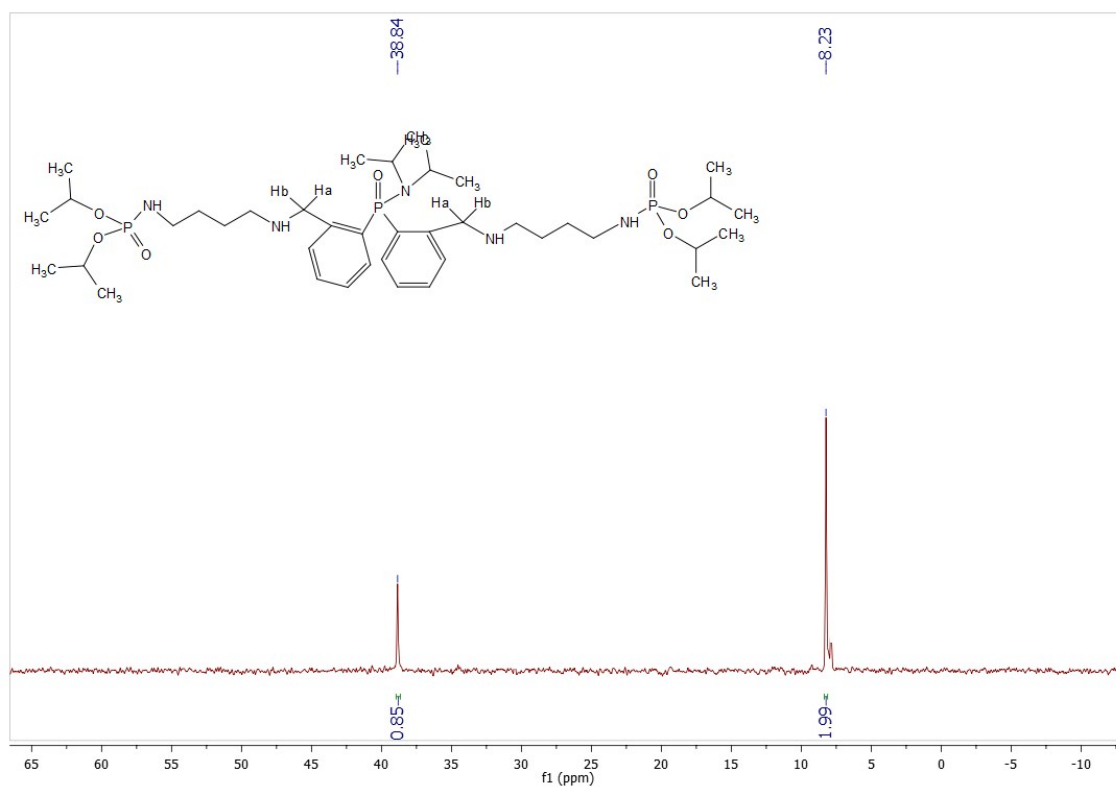

# HRMS (ESI) spectrum of 13b

m8cm56

03-17-03 (0.030) Is (1.00,1.00) C<sub>40</sub>H<sub>75</sub>N<sub>5</sub>O<sub>7</sub>P<sub>3</sub>

1: TOF MS ES+  
6.13e12

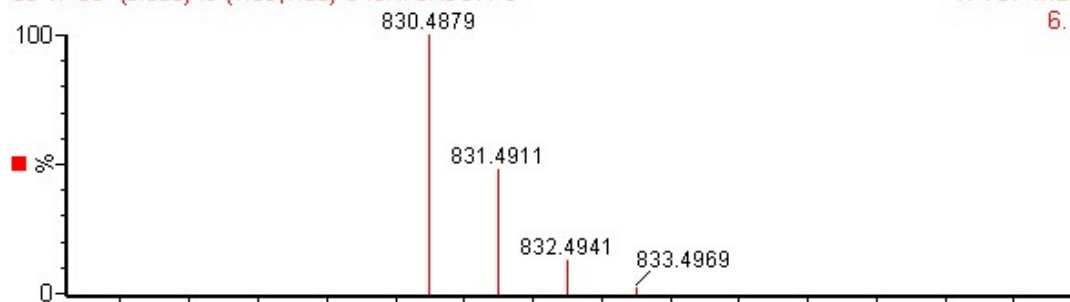

03-17-03 381 (1.439) Cm (381-280:304)

1: TOF MS ES+  
1.69e3

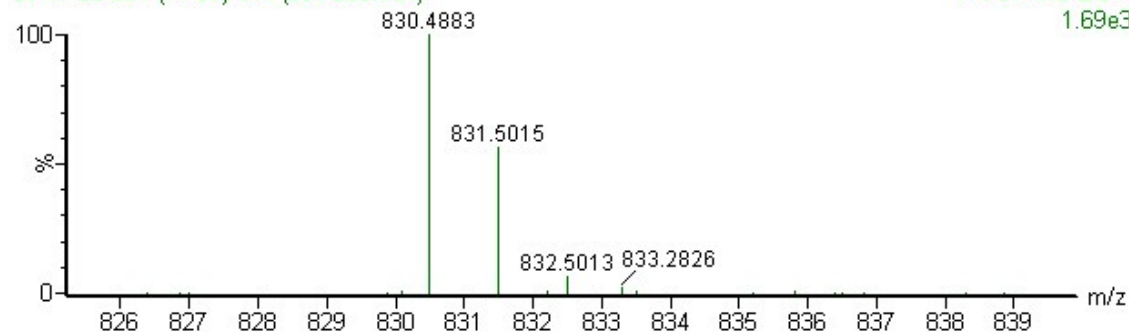

m8cm56

03-17-03 381 (1.439) Cm (381-280:304)

1: TOF MS ES+  
1.69e3

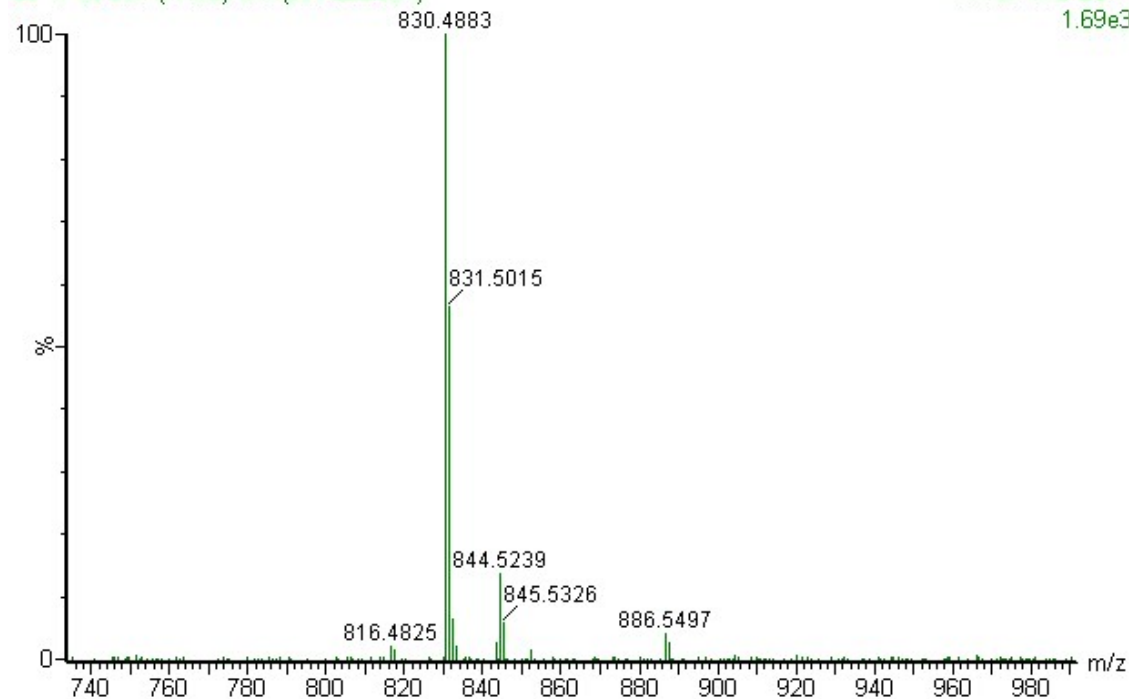

<sup>1</sup>H NMR spectrum of **13c**

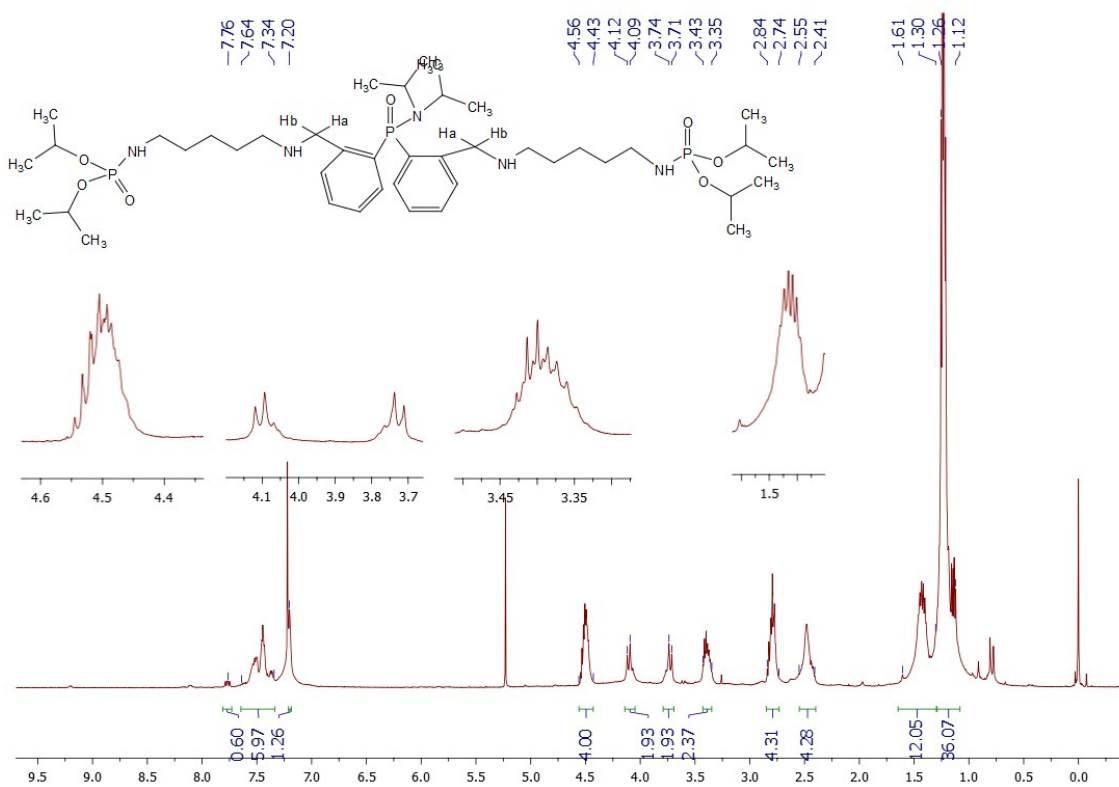

<sup>13</sup>C NMR spectrum of **13c**

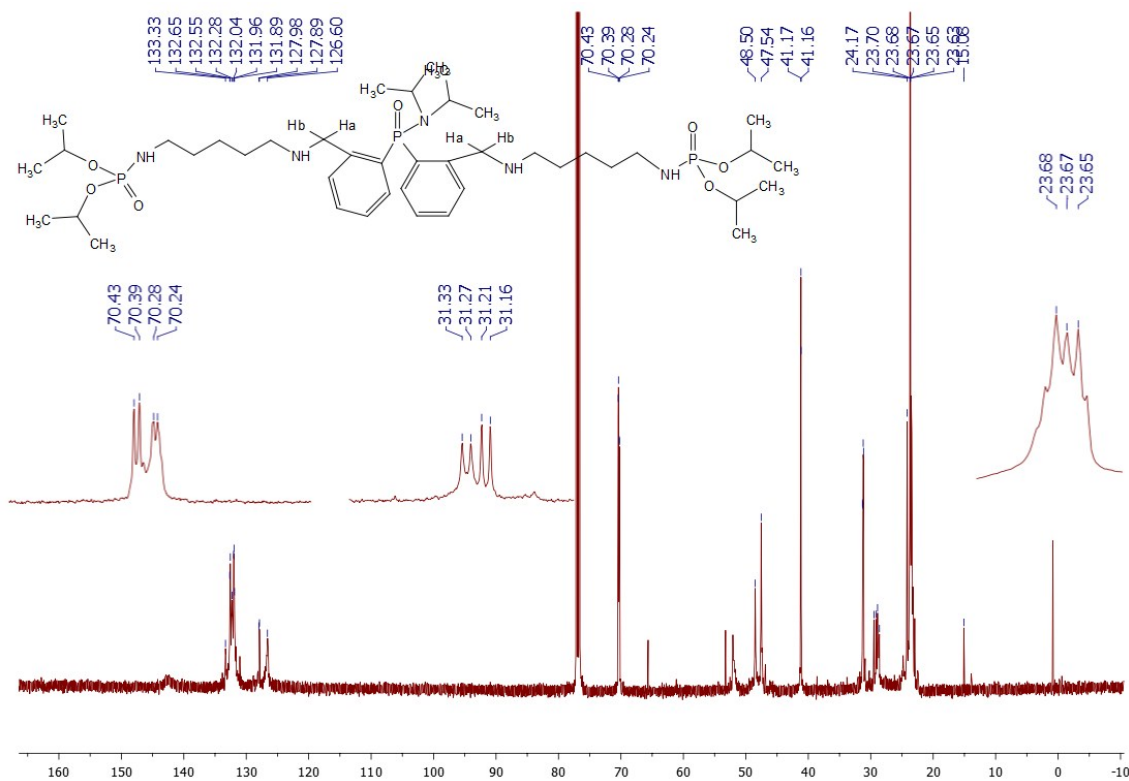

$^{31}\text{P}$  NMR spectrum of **13c**

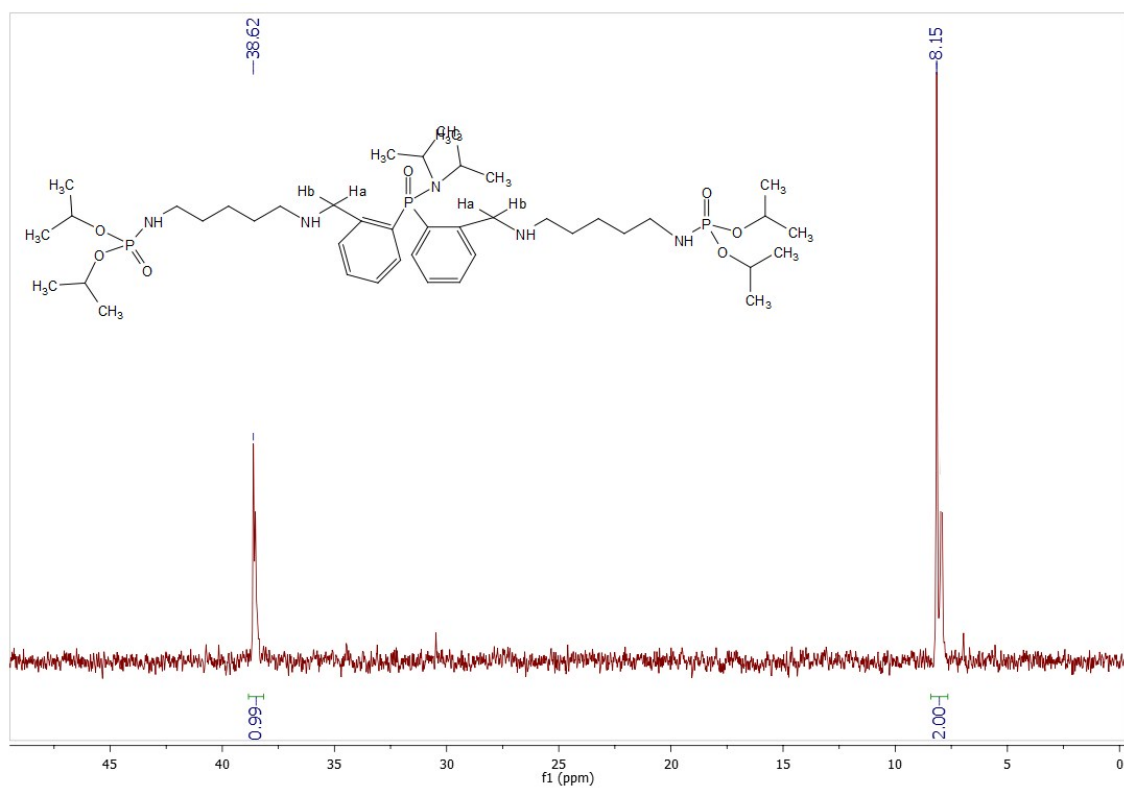

# HRMS (ESI) spectrum of 13c

m8cm62

03-17-07 (0.030) Is (1.00,1.00) C<sub>42</sub>H<sub>79</sub>N<sub>5</sub>O<sub>7</sub>P<sub>3</sub>

1: TOF MS ES+  
6.00e12

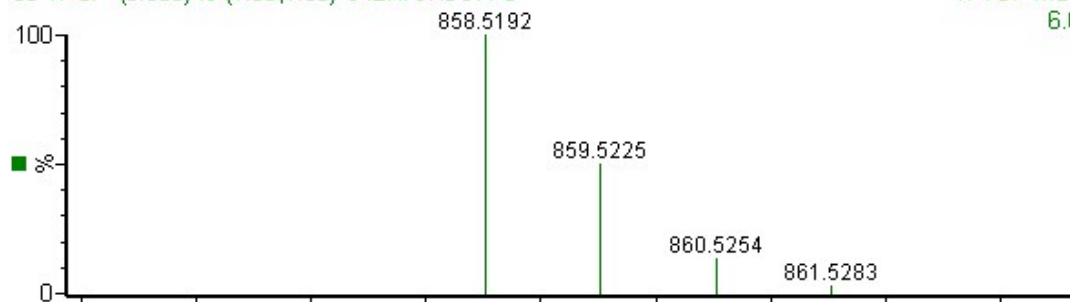

03-17-07 435 (1.651) Cm (435-271:292)

1: TOF MS ES+  
1.60e3

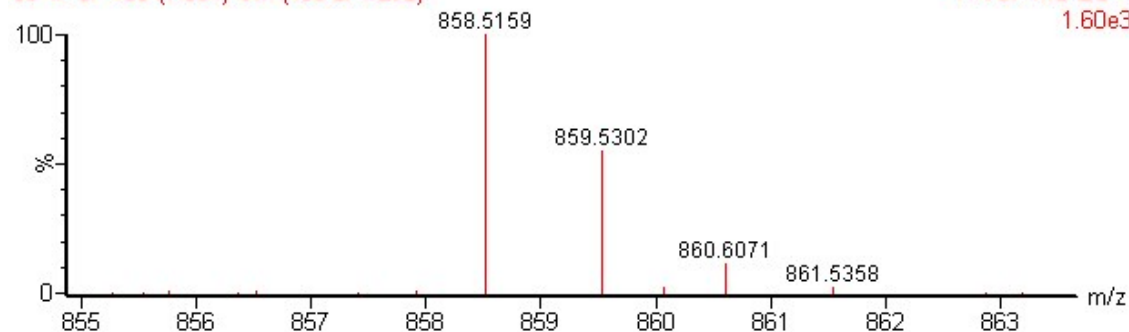

m8cm62

03-17-07 435 (1.651) Cm (435-271:292)

1: TOF MS ES+  
2.60e3

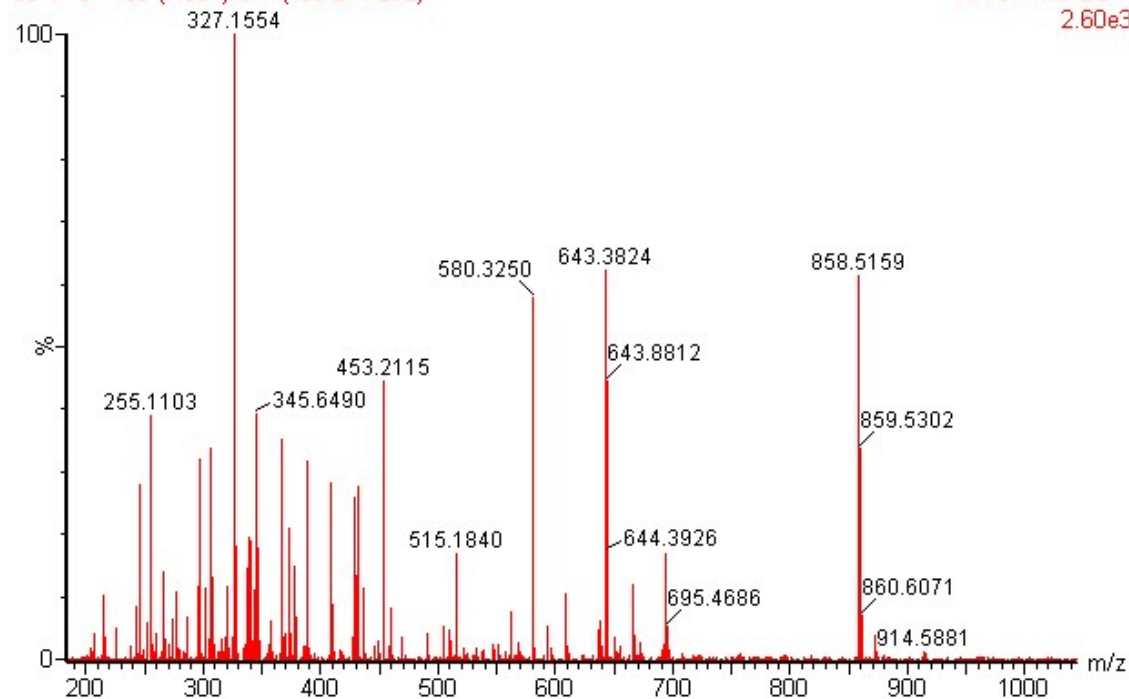

<sup>1</sup>H NMR spectrum of **13d**

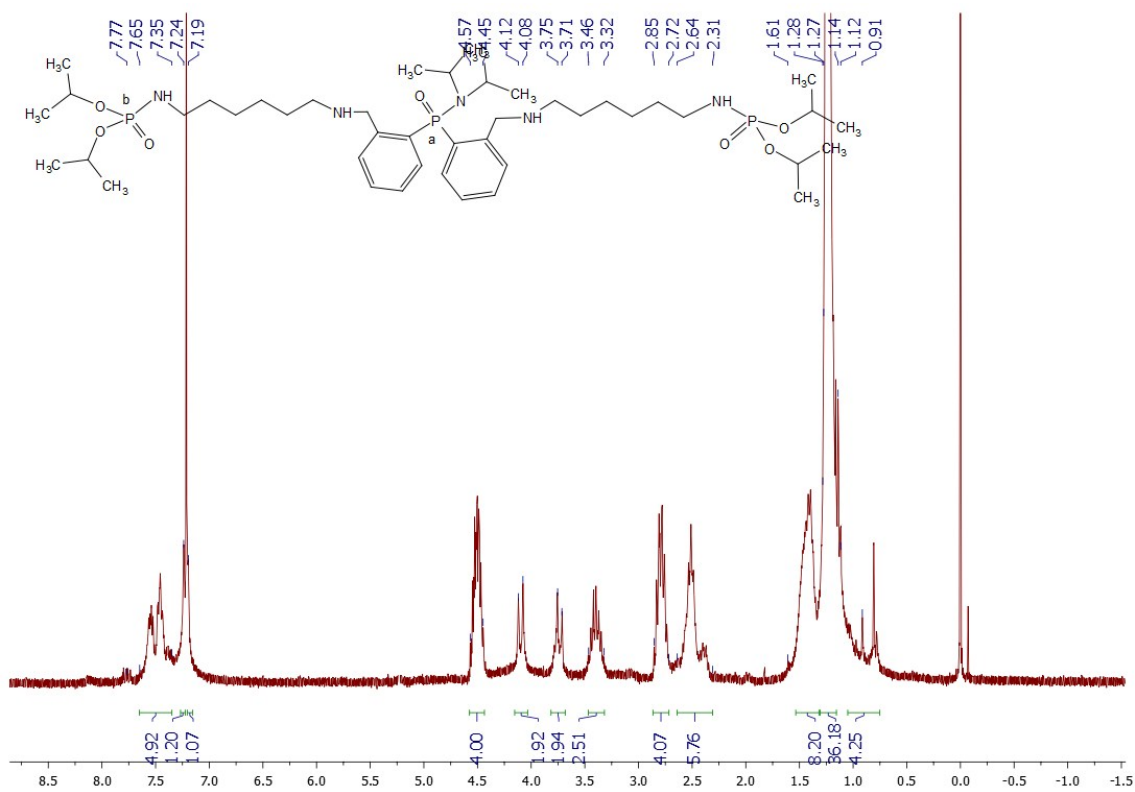

<sup>13</sup>C NMR spectrum of **13d**

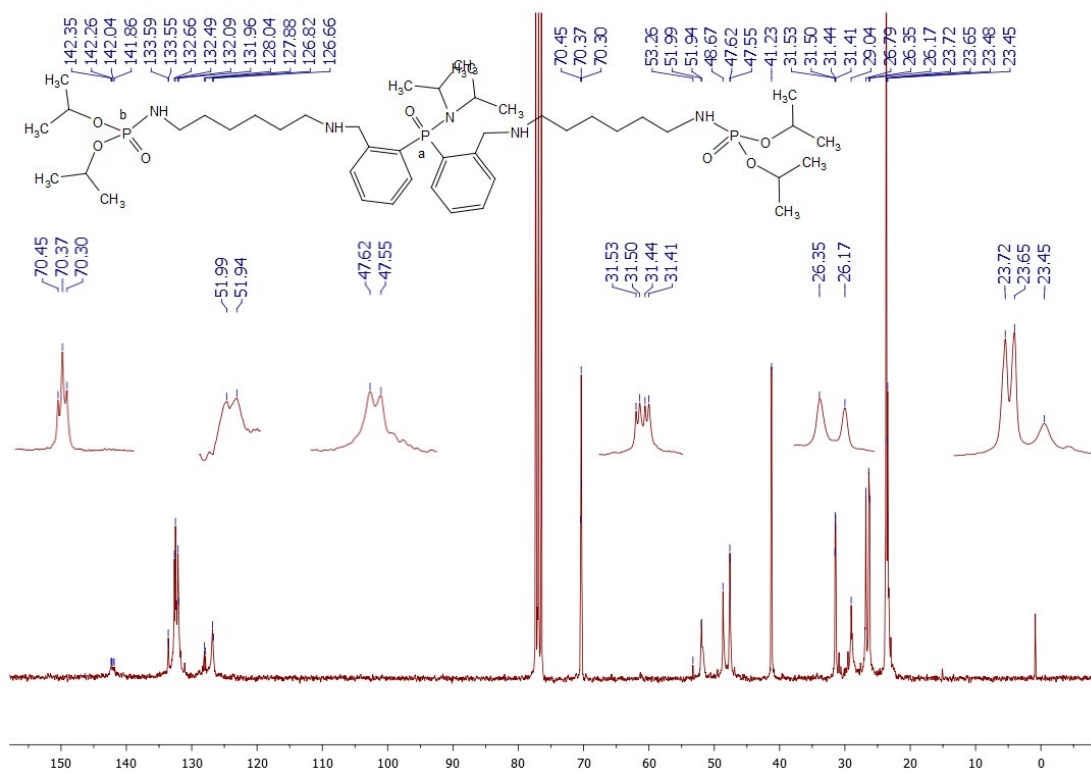

### $^{31}\text{P}$ NMR spectrum of **13d**

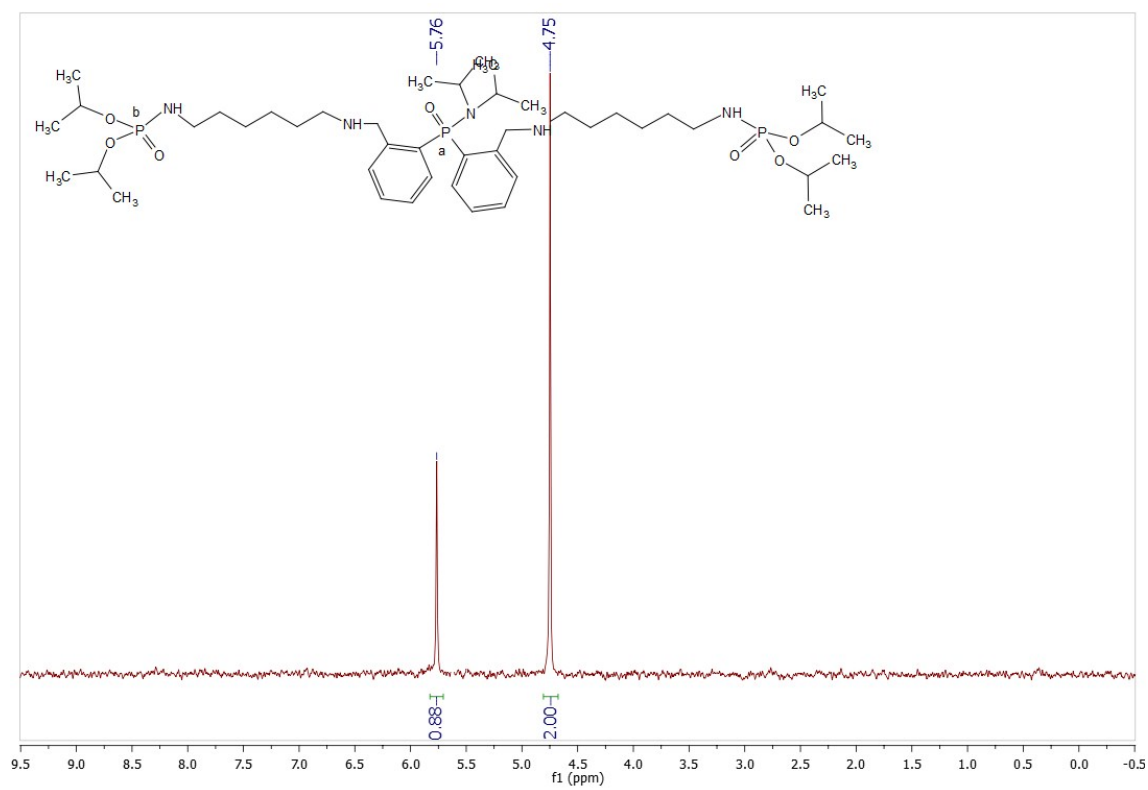



# HRMS (ESI) spectrum of 13d

m8cm61

03-17-06 (0.030) Is (1.00,1.00) C<sub>44</sub>H<sub>83</sub>N<sub>5</sub>O<sub>7</sub>P<sub>3</sub>

1: TOF MS ES+  
5.86e12

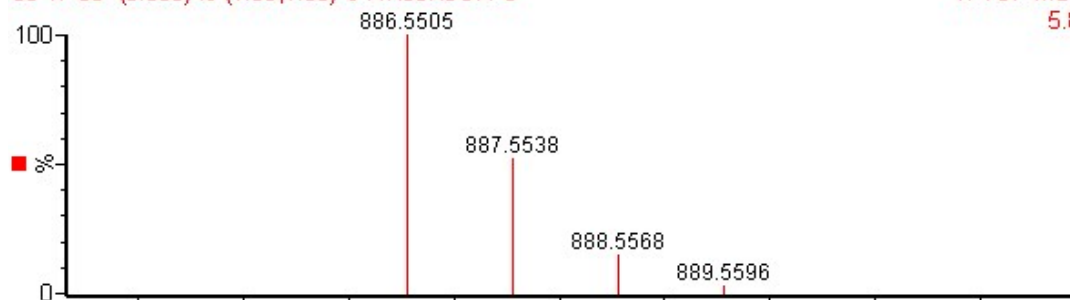

03-17-06 372 (1.407) Cm (372-200:266)

1: TOF MS ES+  
2.41e3

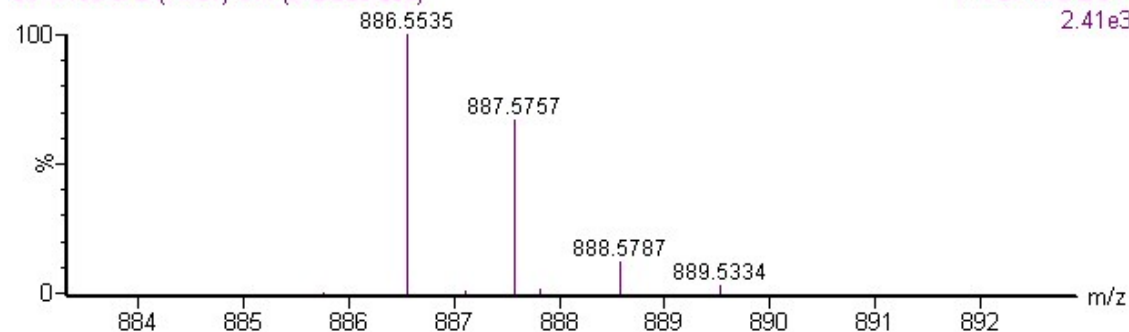

m8cm61

03-17-06 372 (1.407) Cm (372-200:266)

1: TOF MS ES+  
9.19e3

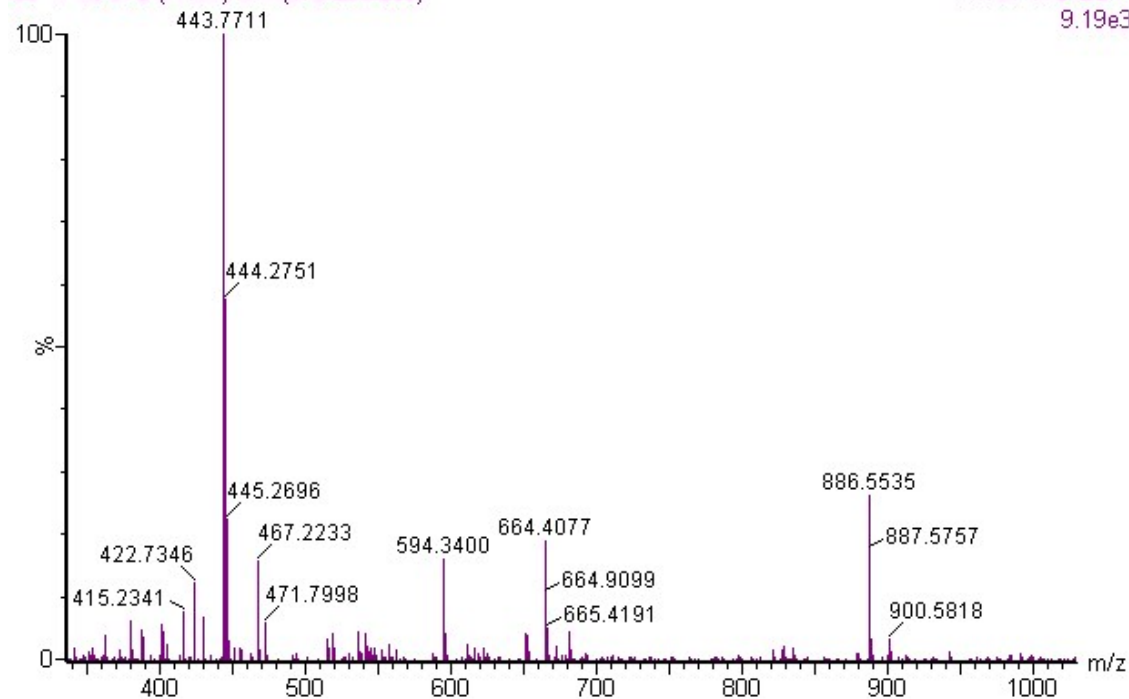

## Complexation data

### 1) $^1\text{H}$ NMR spectra of **11b** and **11b/ZnCl<sub>2</sub>**

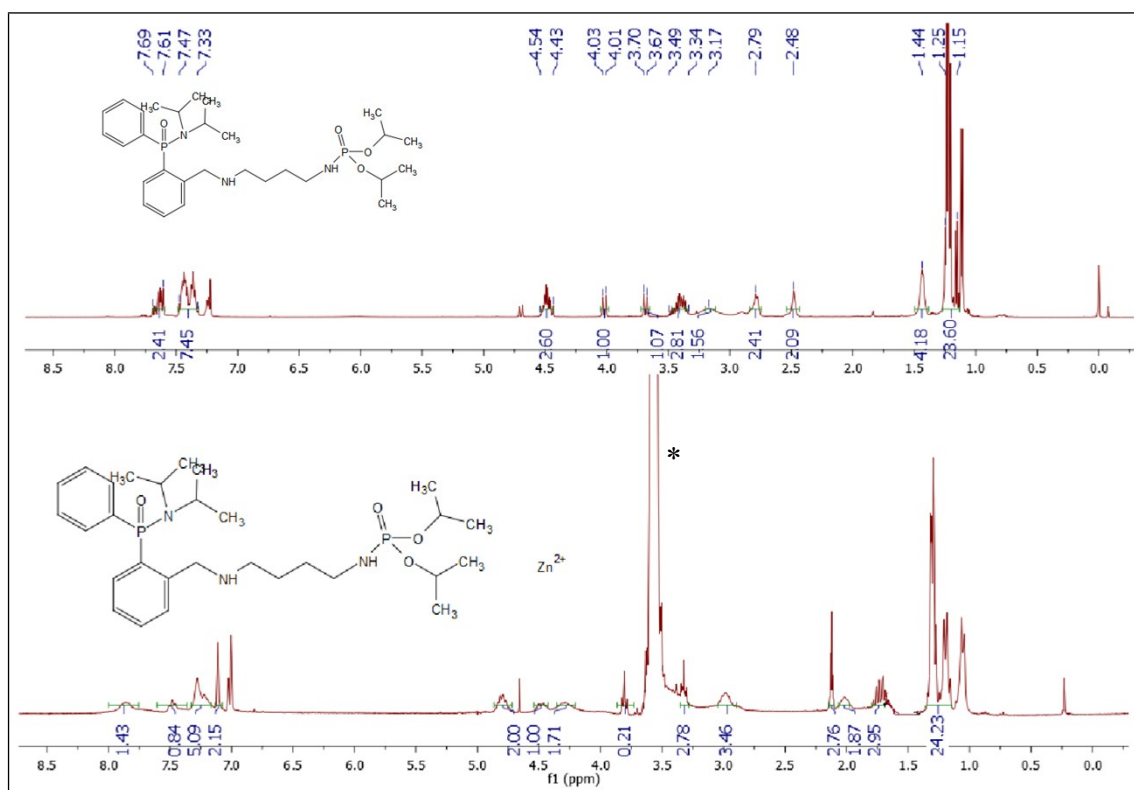

\*from methanol

## 2) IR spectra

IR spectrum of **6a**

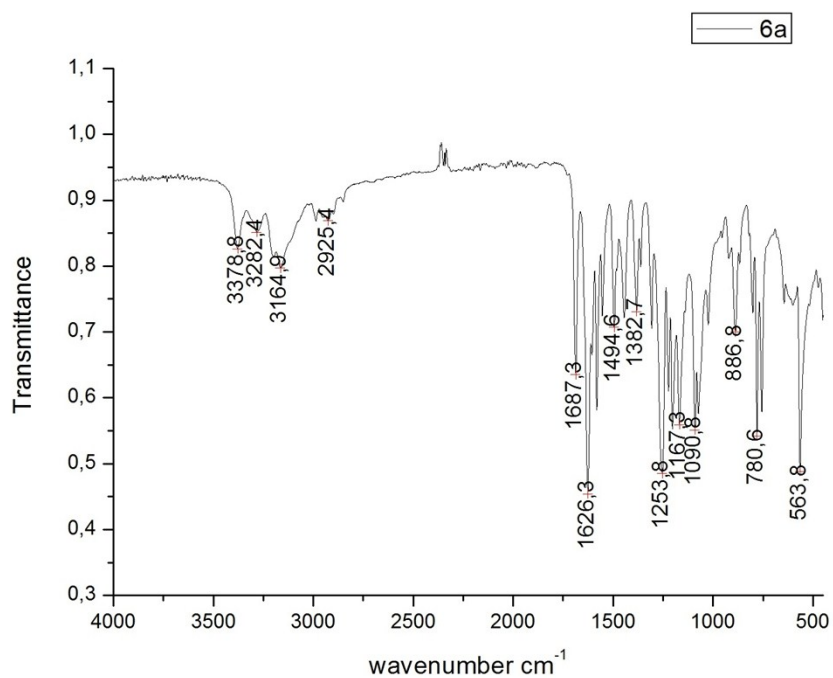

IR spectrum of **6a** in the presence of  $\text{ZnCl}_2$

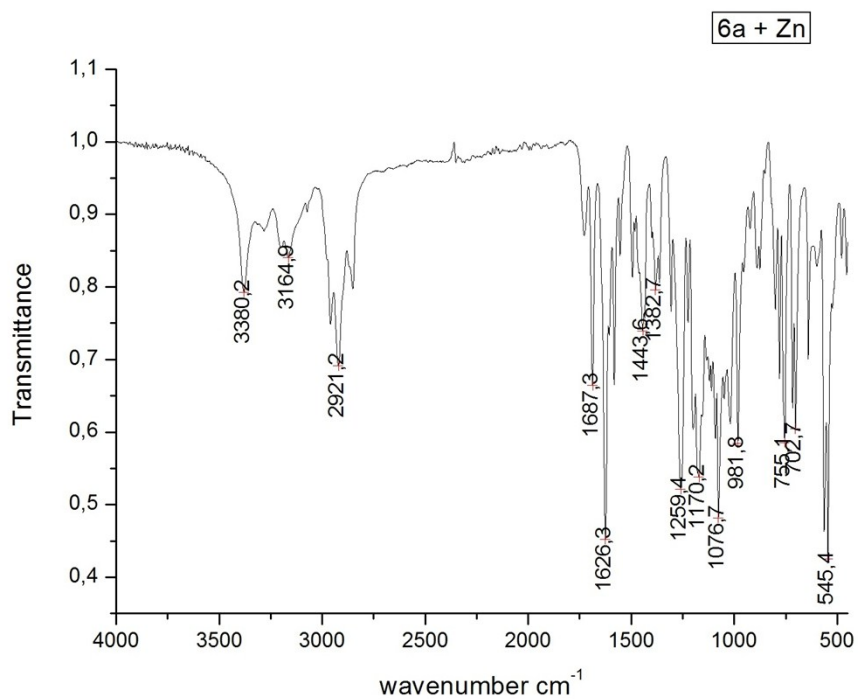

IR spectrum of **6a** in the presence of  $\text{CuSO}_4$

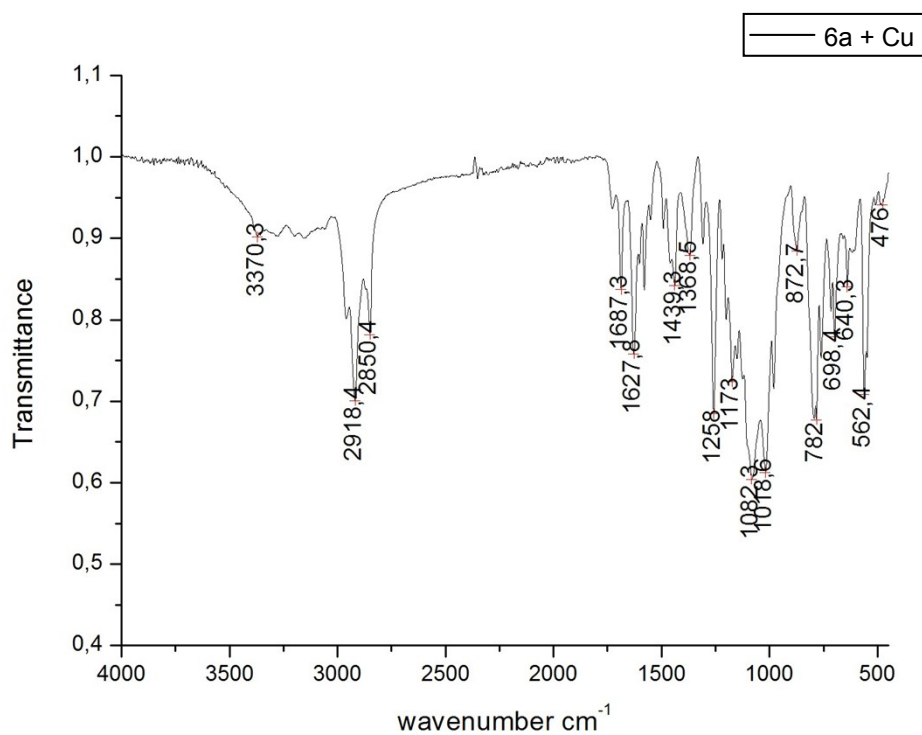

IR spectrum of **6a** in the presence of  $\text{Y}(\text{NO}_3)_3$

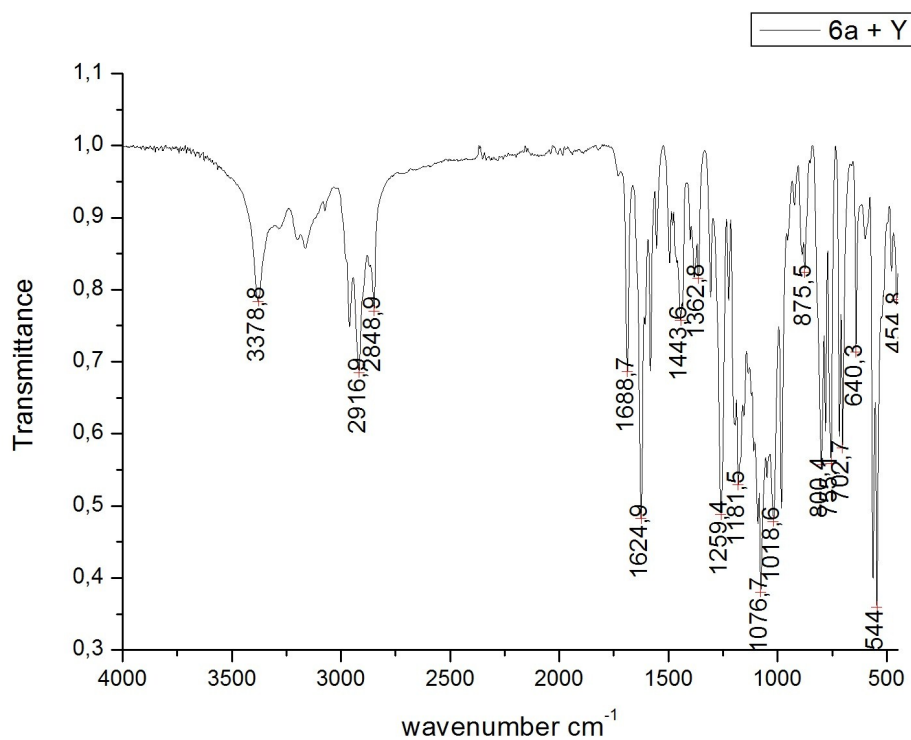

IR spectrum of **6b**

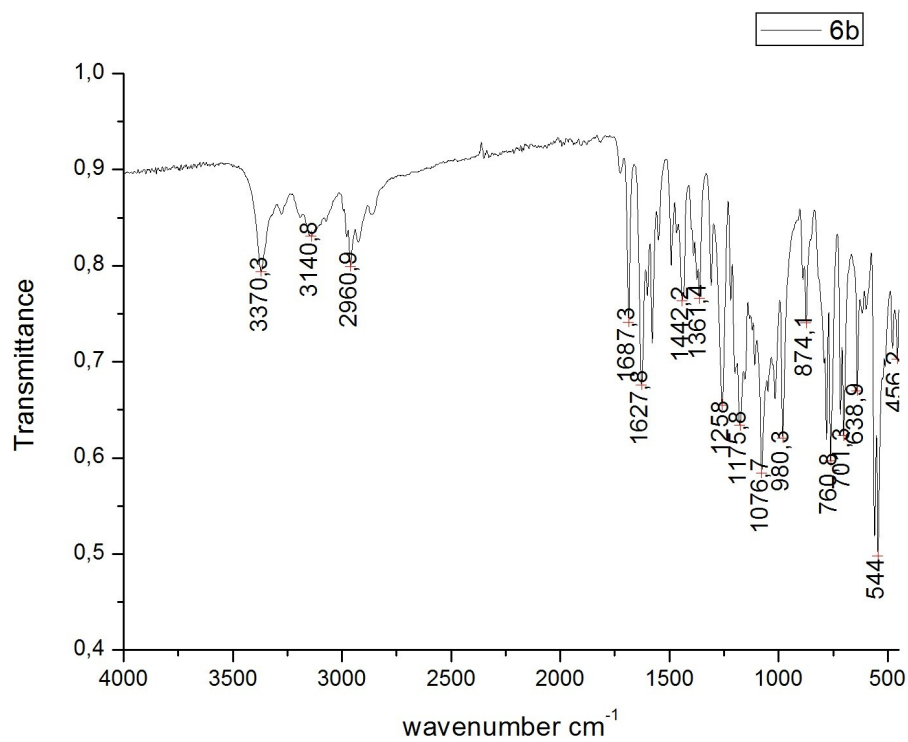

IR spectrum of **6b** in the presence of  $\text{ZnCl}_2$

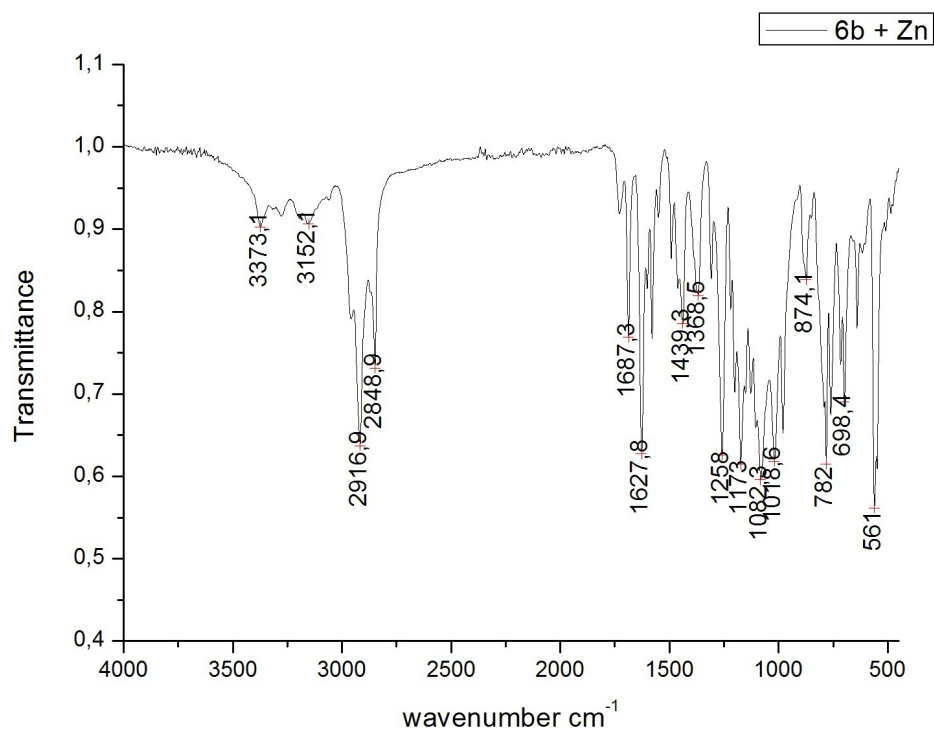

IR spectrum of **6b** in the presence of  $\text{CuSO}_4$

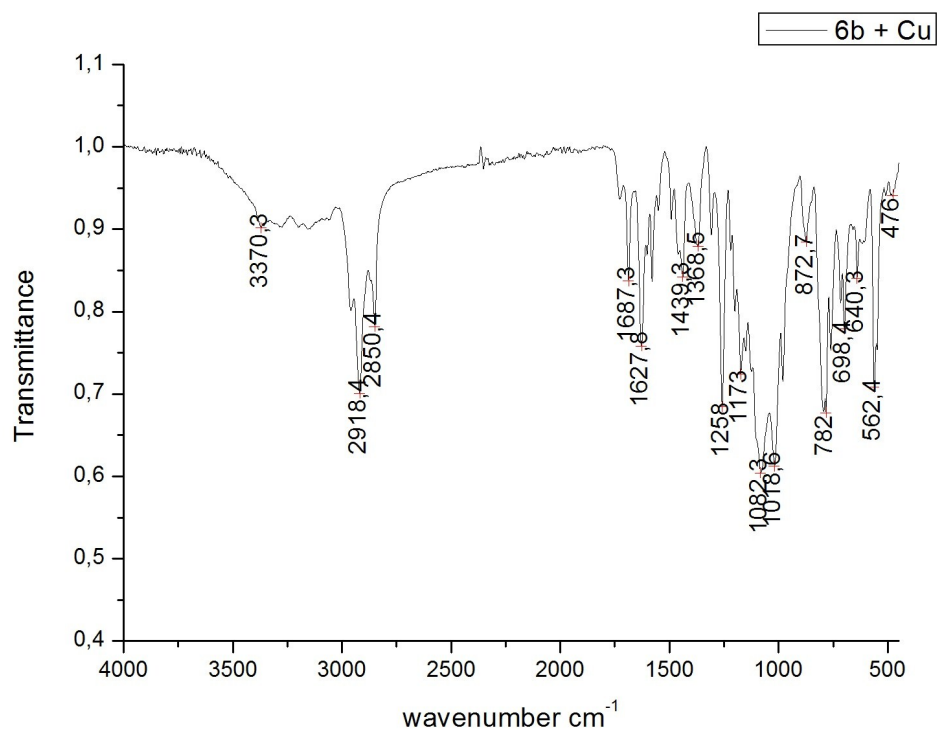

IR spectrum of **6b** in the presence of  $\text{Y}(\text{NO}_3)_3$

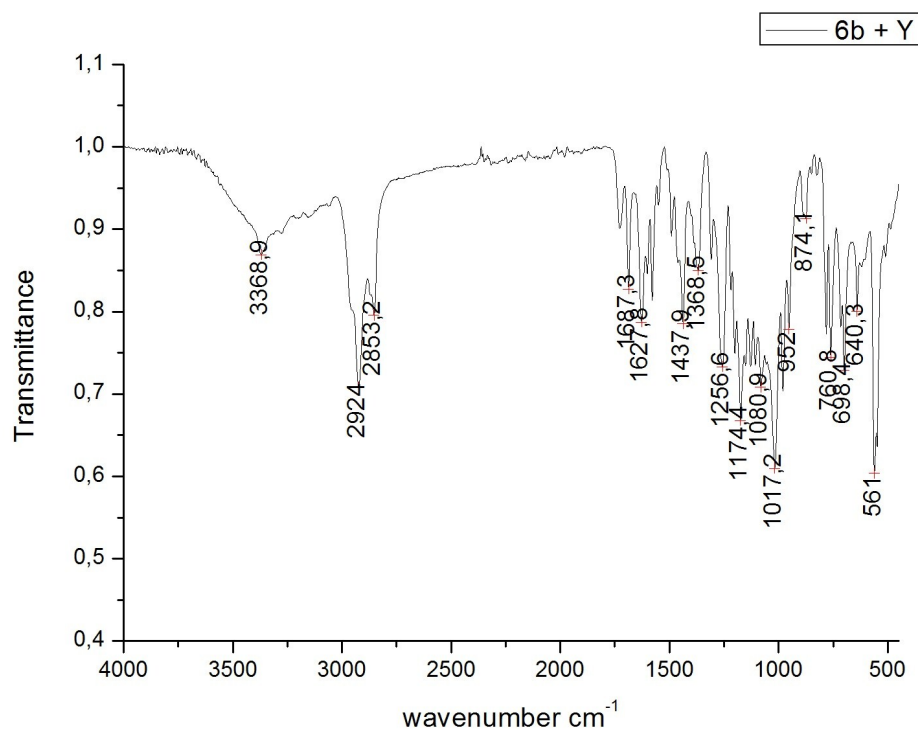

IR spectrum of **6c**

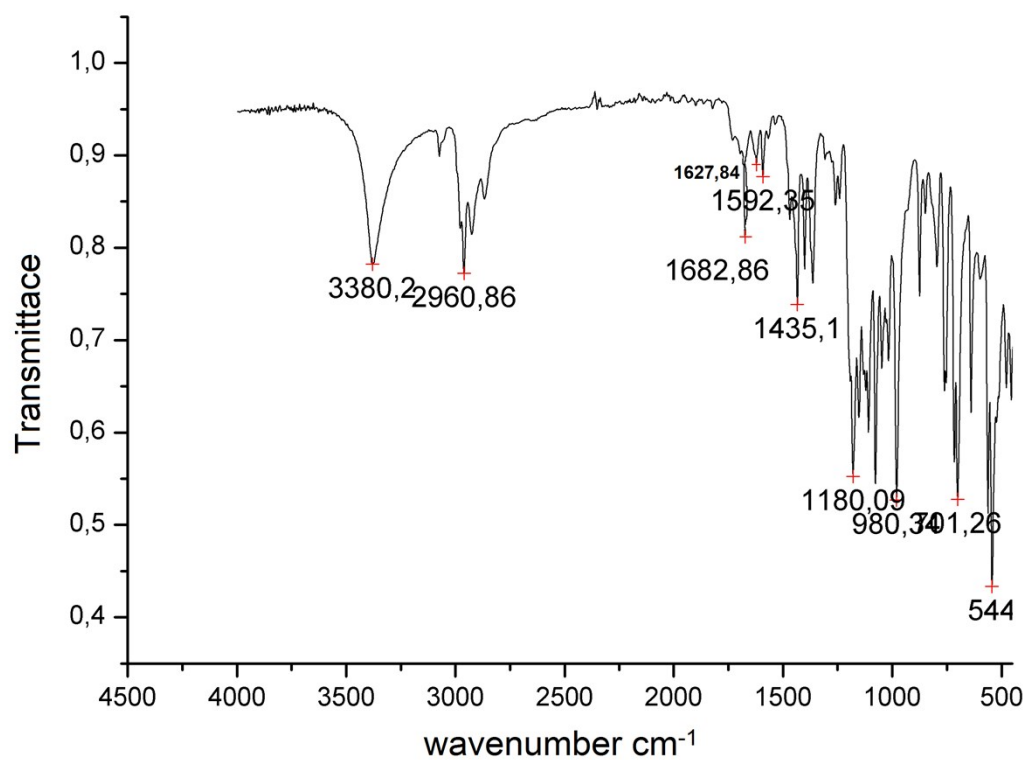

IR spectrum of **6c** in the presence of  $\text{ZnCl}_2$

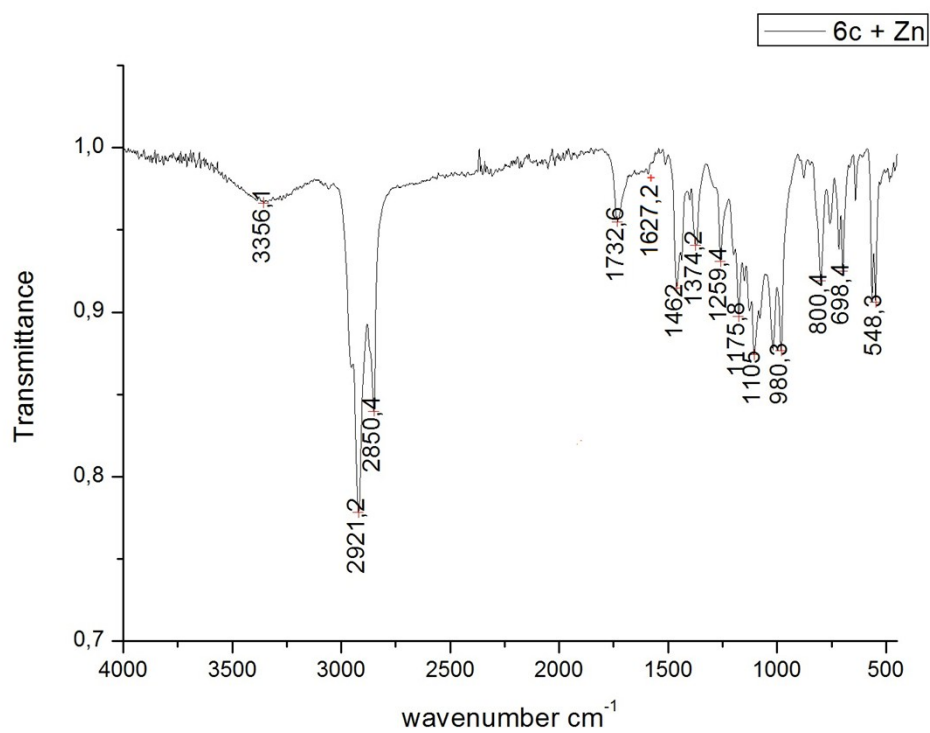

IR spectrum of **6c** in the presence of  $\text{CuSO}_4$

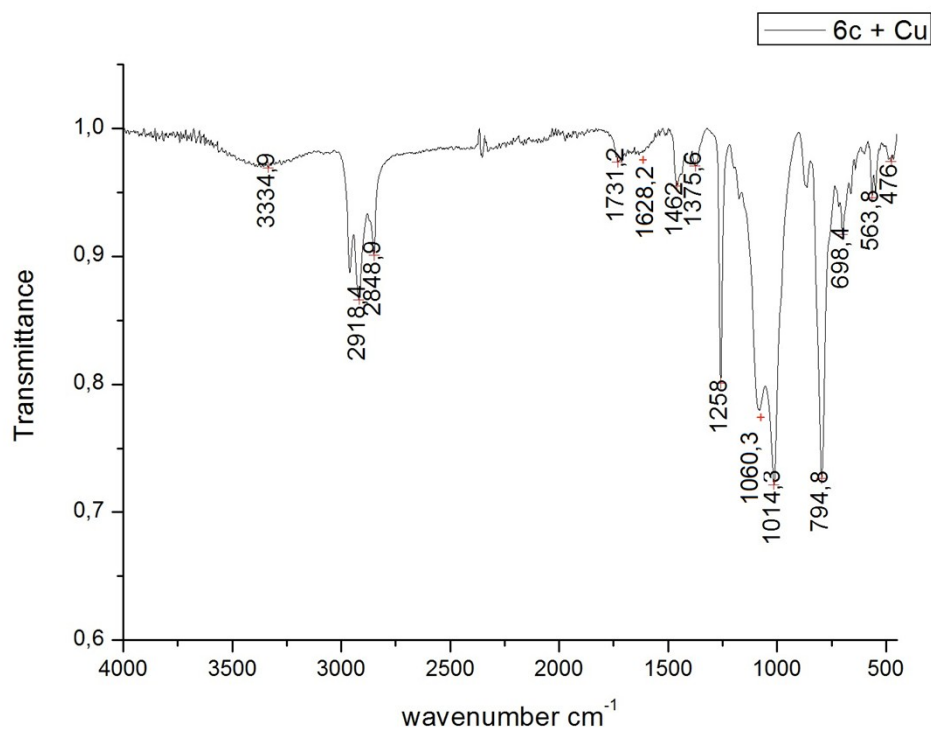

IR spectrum of **6c** in the presence of  $\text{Y}(\text{NO}_3)_3$

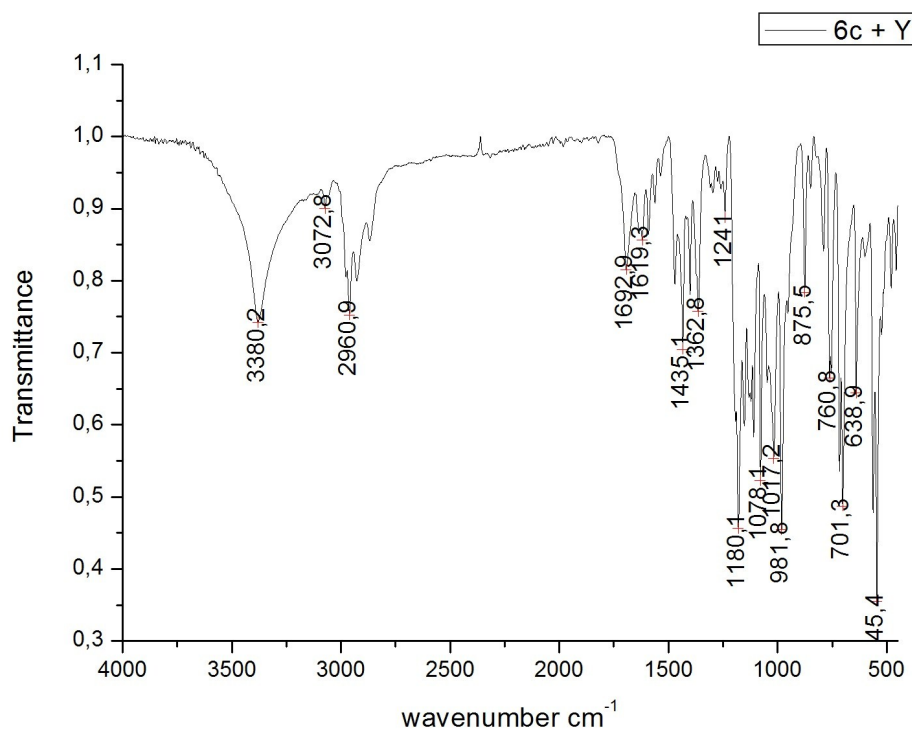



IR spectrum of **8a**

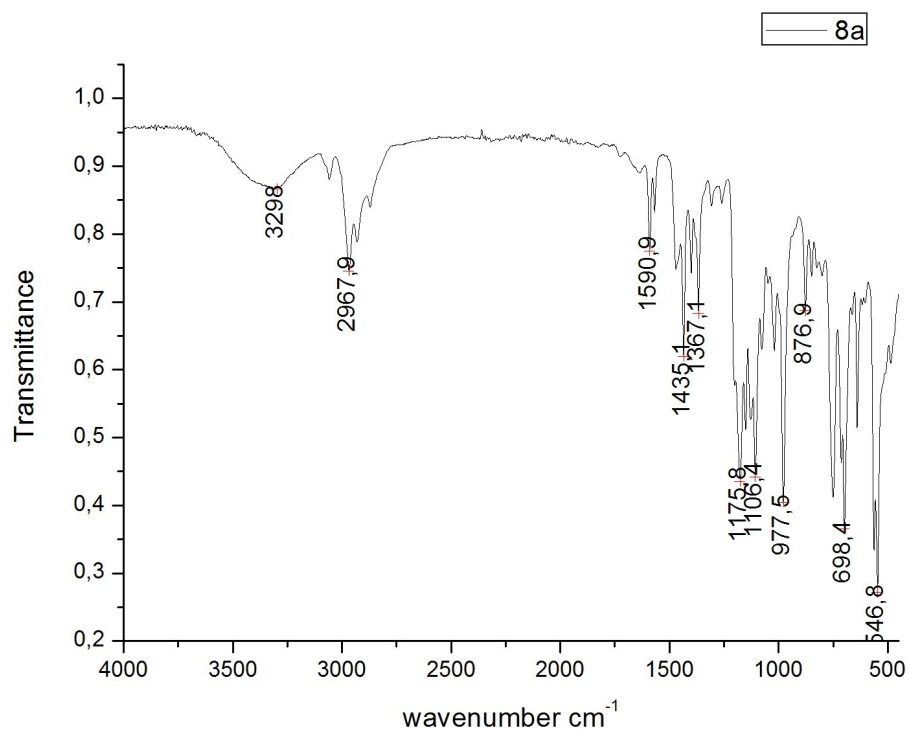

IR spectrum of **8a** in the presence of  $\text{ZnCl}_2$

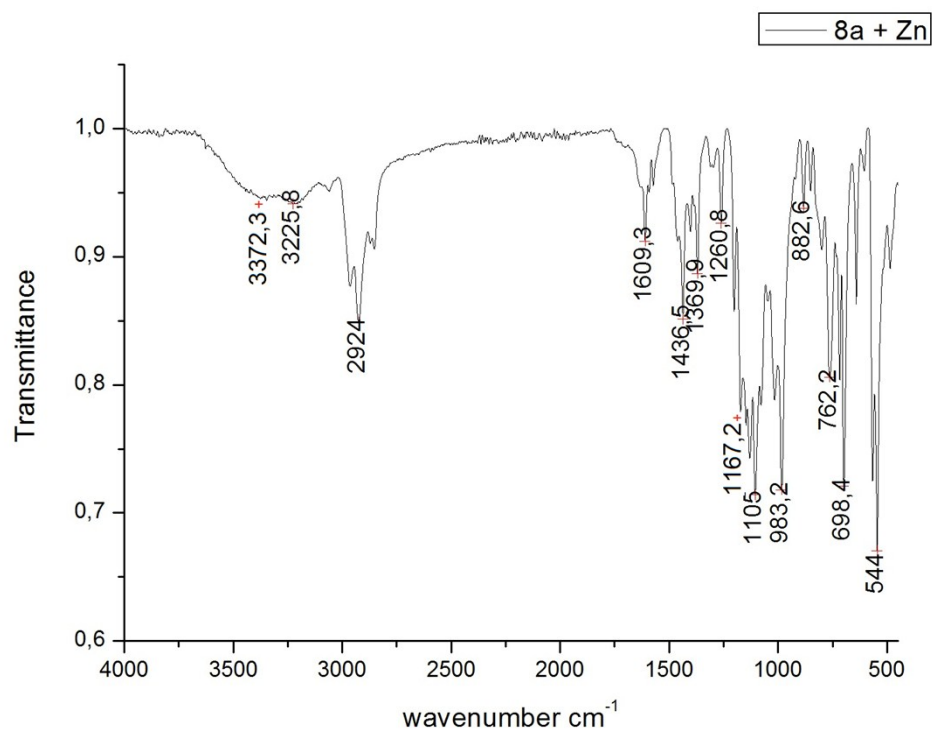

IR spectrum of **8a** in the presence of  $\text{CuSO}_4$

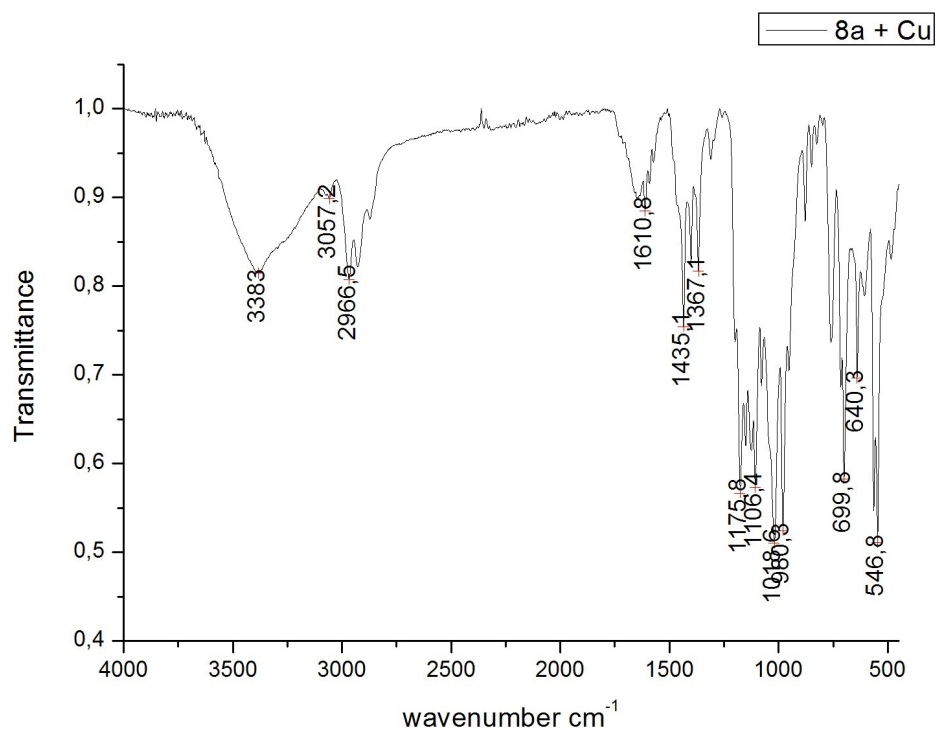

IR spectrum of **8a** in the presence of  $\text{Y}(\text{NO}_3)_3$

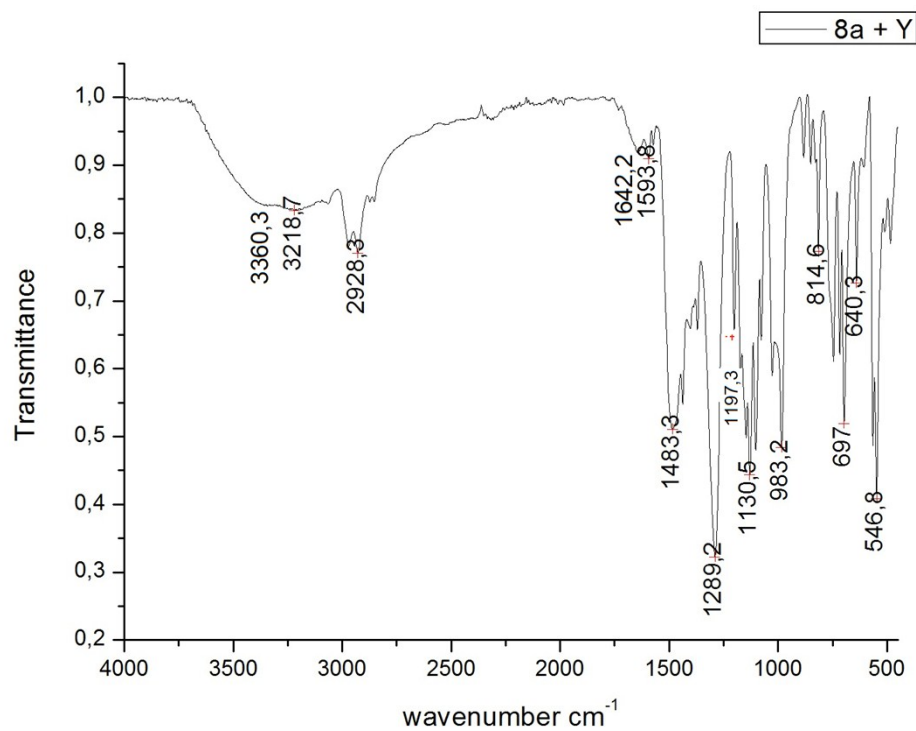

IR spectrum of **8b**

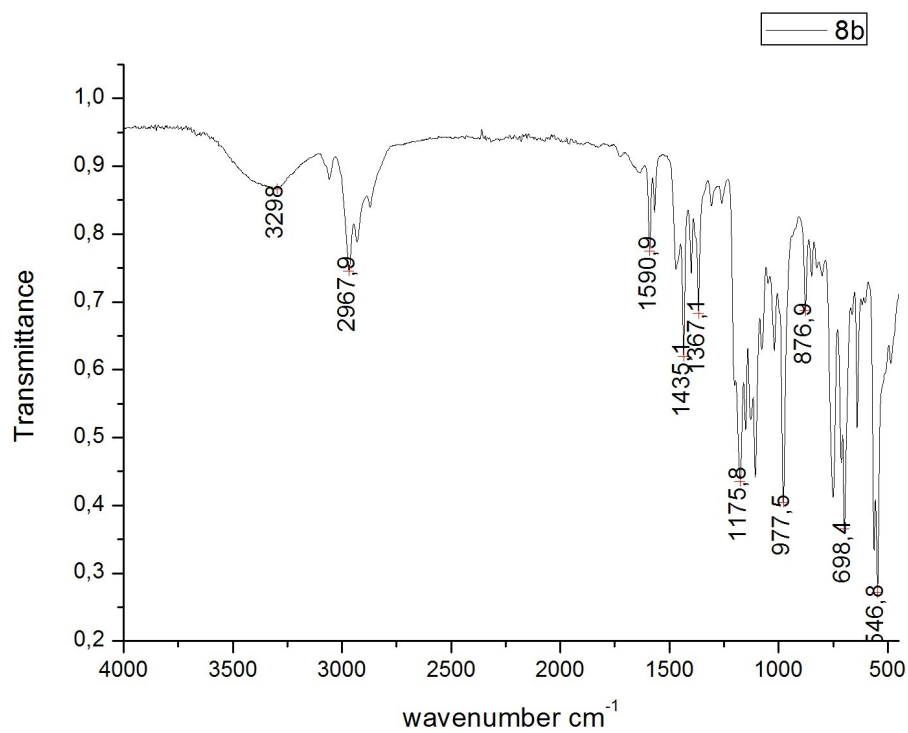

IR spectrum of **8b** in the presence of  $\text{ZnCl}_2$

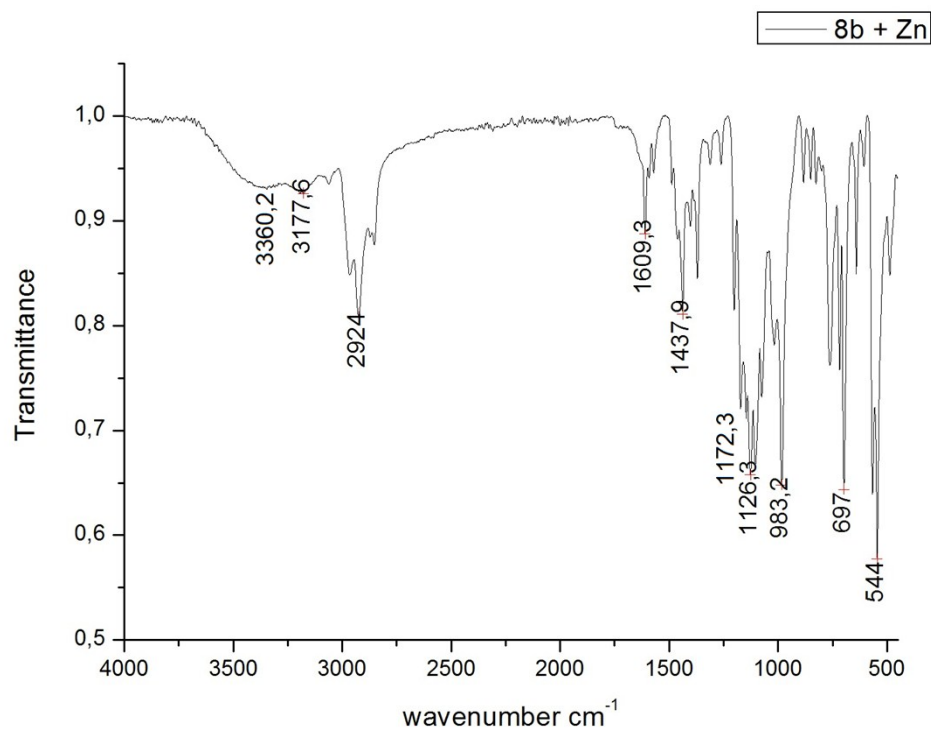

IR spectrum of **8b** in the presence of  $\text{CuSO}_4$

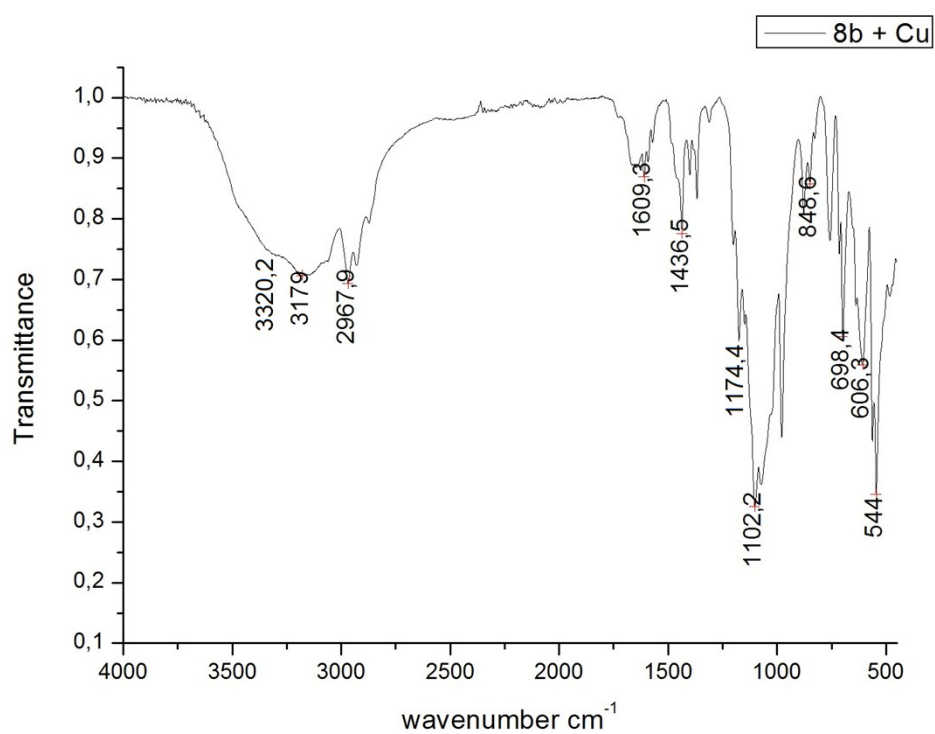

IR spectrum of **8b** in the presence of  $\text{Y}(\text{NO}_3)_3$

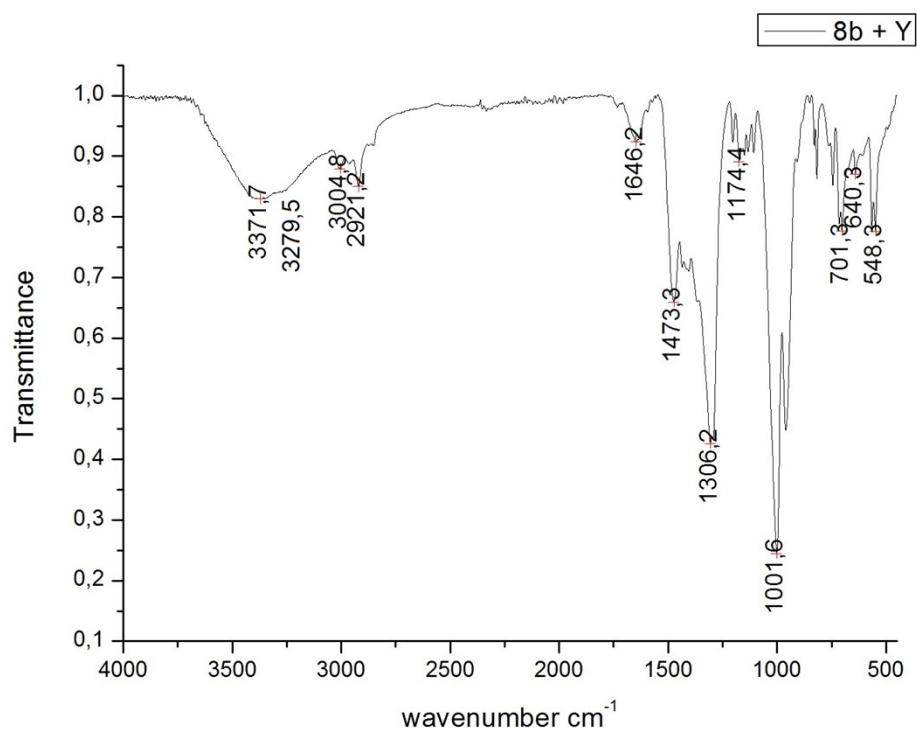

IR spectrum of **11a**

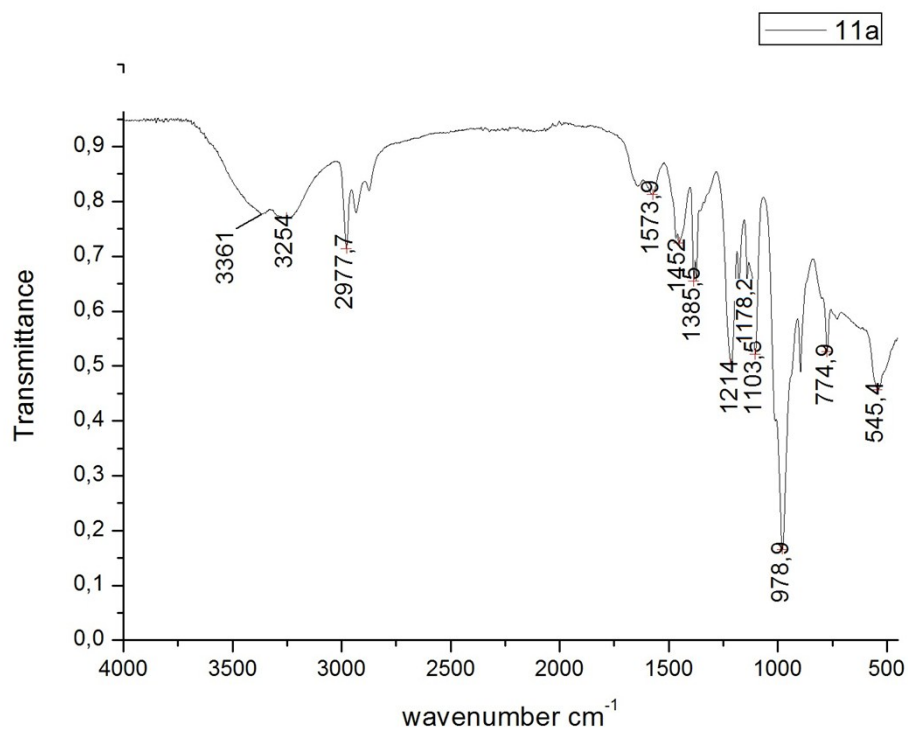

IR spectrum of **11a** in the presence of ZnCl<sub>2</sub>

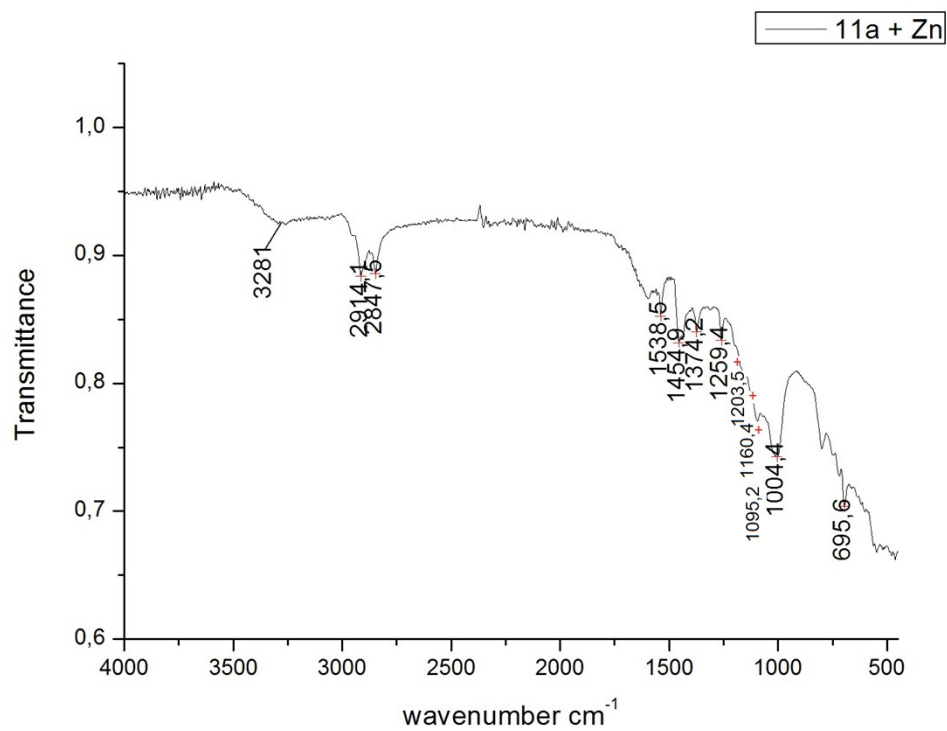

IR spectrum of **11a** in the presence of  $\text{CuSO}_4$

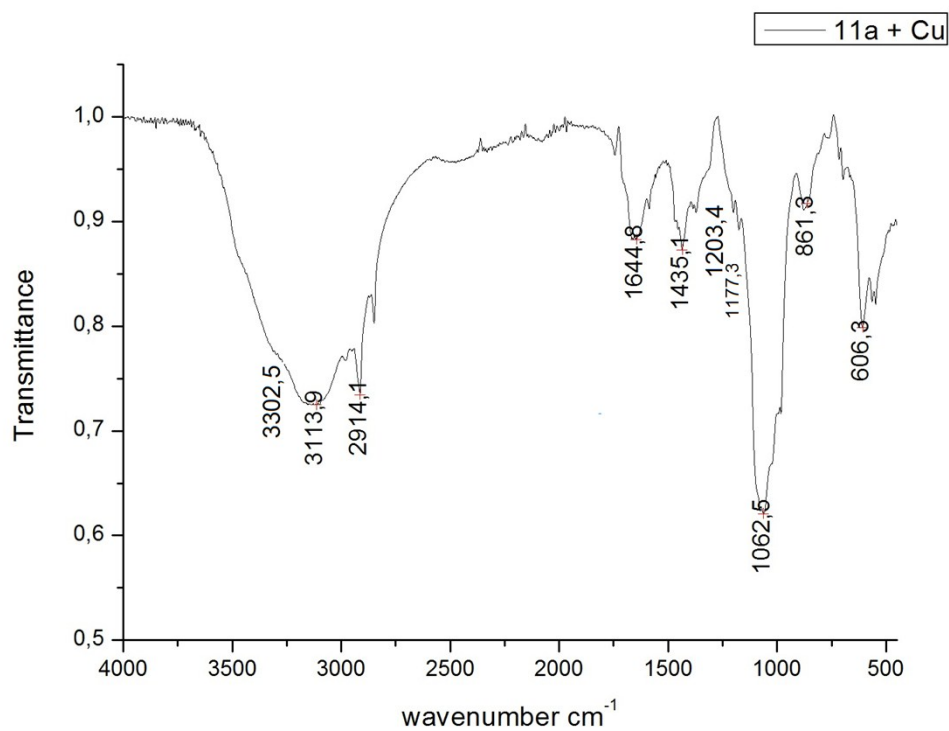

IR spectrum of **11a** in the presence of  $\text{Y}(\text{NO}_3)_3$

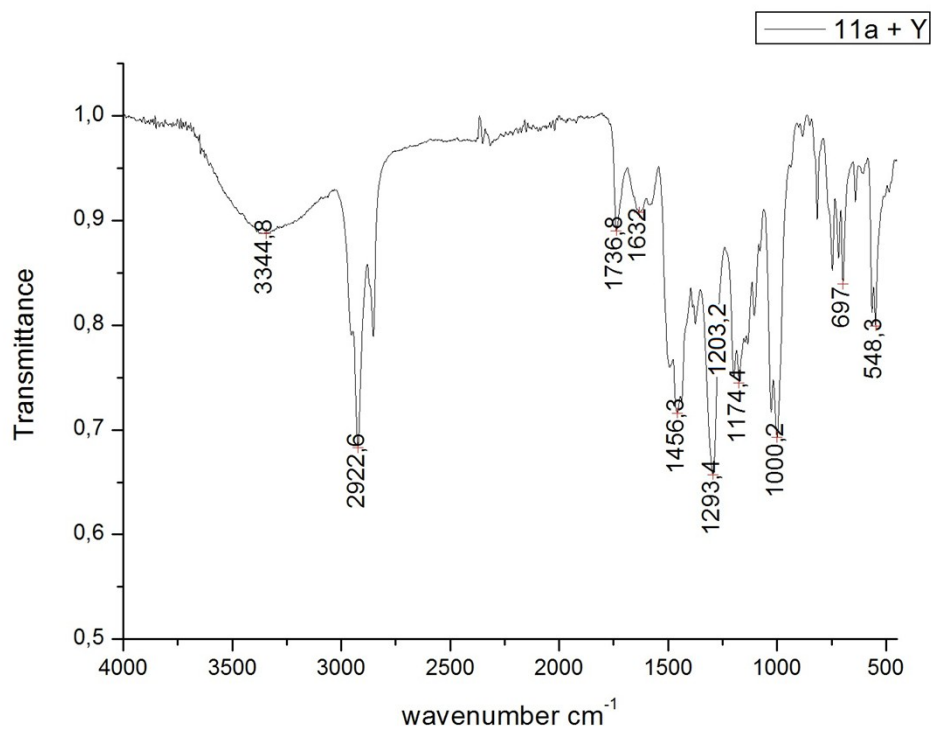

### IR spectrum of **11b**

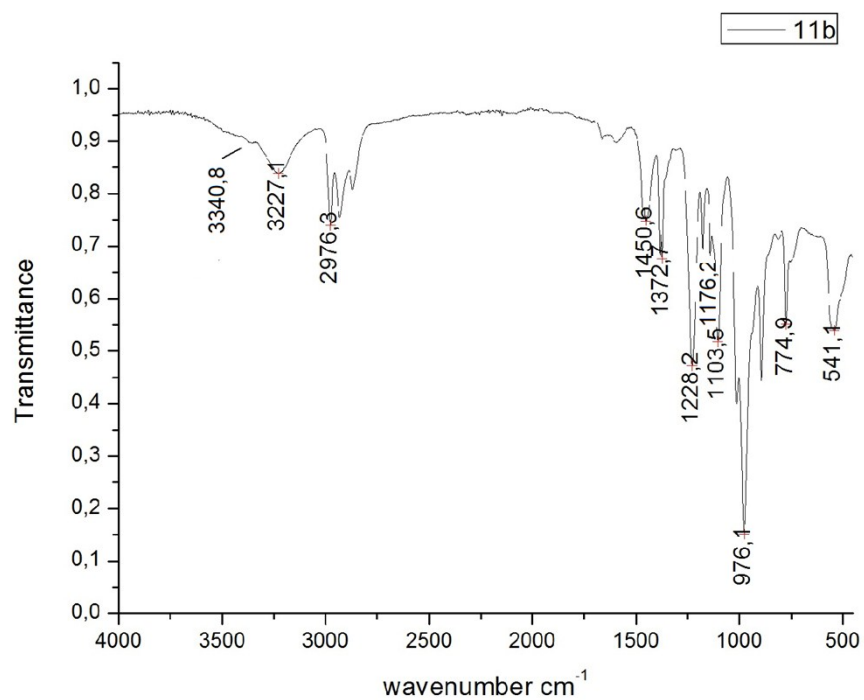

### IR spectrum of **11b** in the presence of $\text{ZnCl}_2$

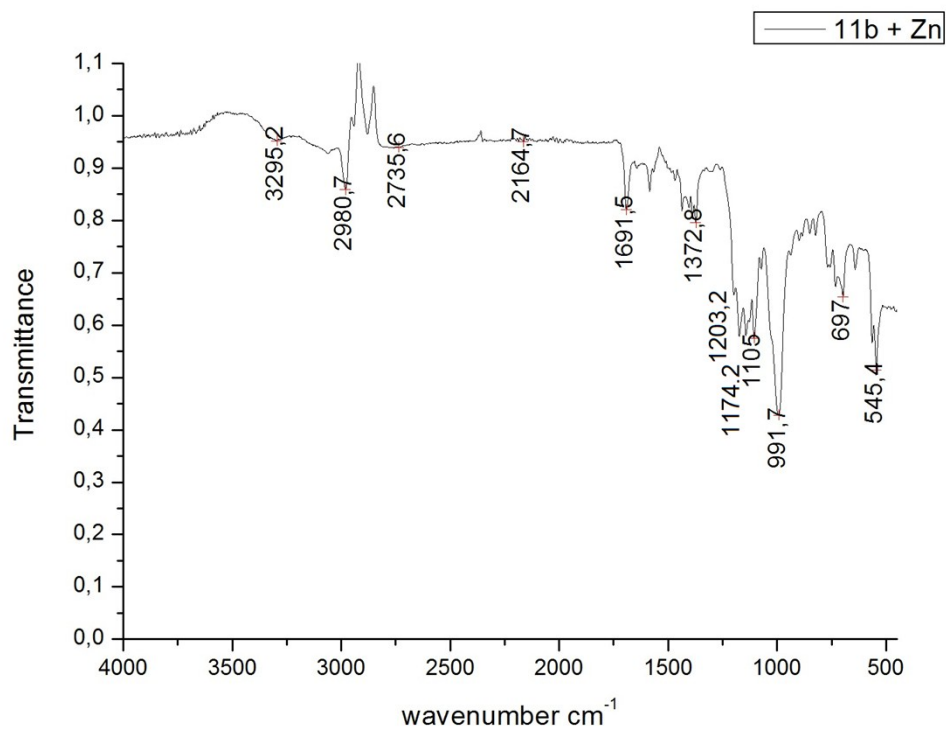

IR spectrum of **11b** in the presence of  $\text{CuSO}_4$

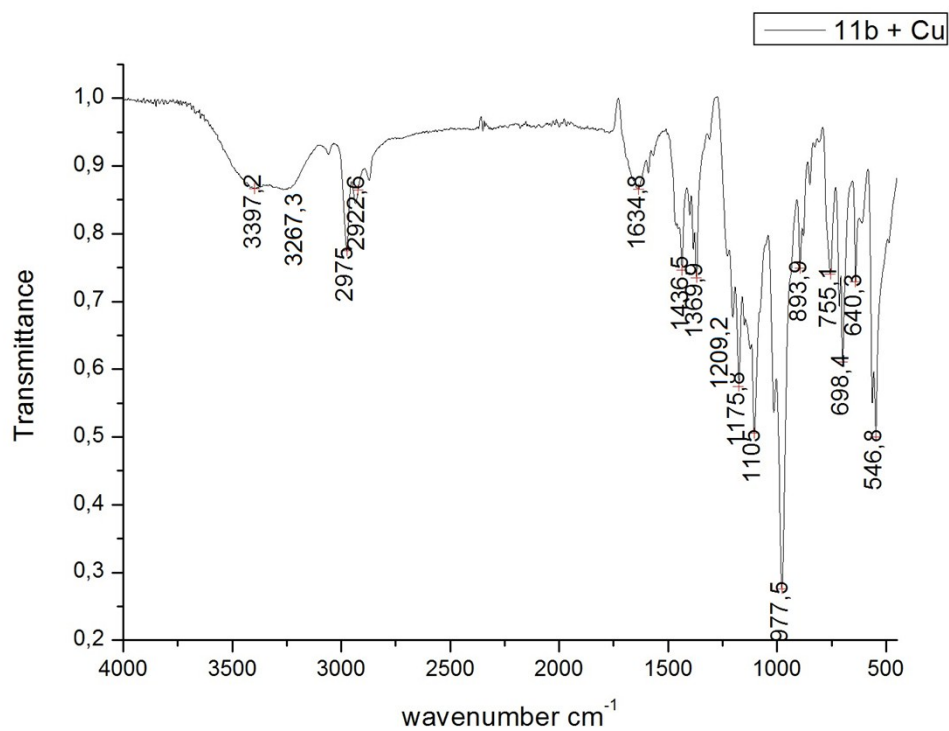

IR spectrum of **11b** in the presence of  $\text{Y}(\text{NO}_3)_3$

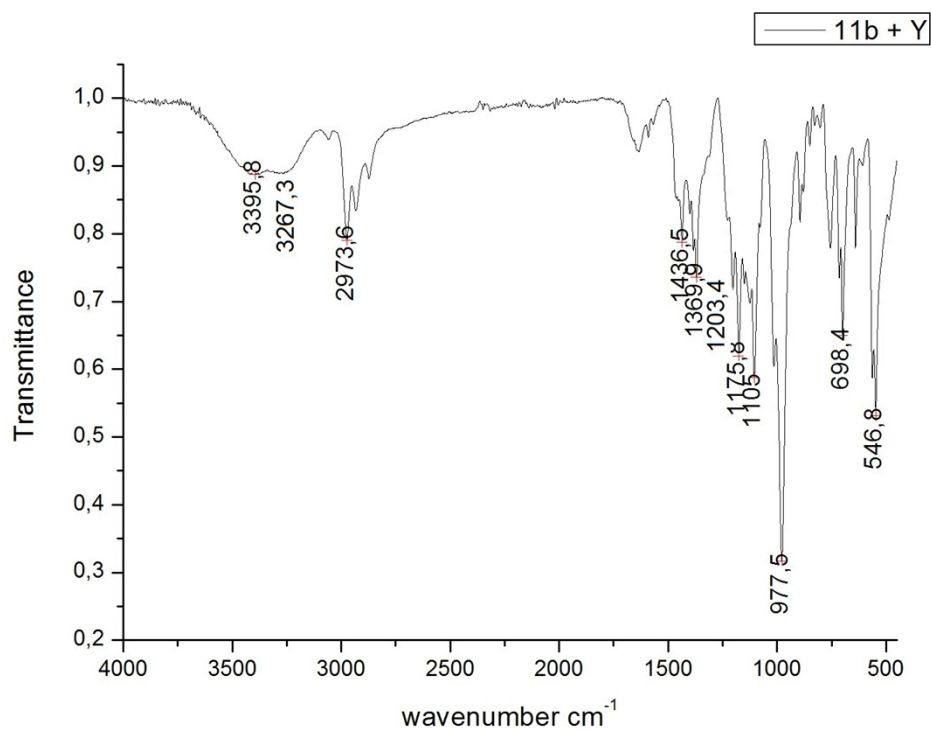



IR spectrum of **11c**

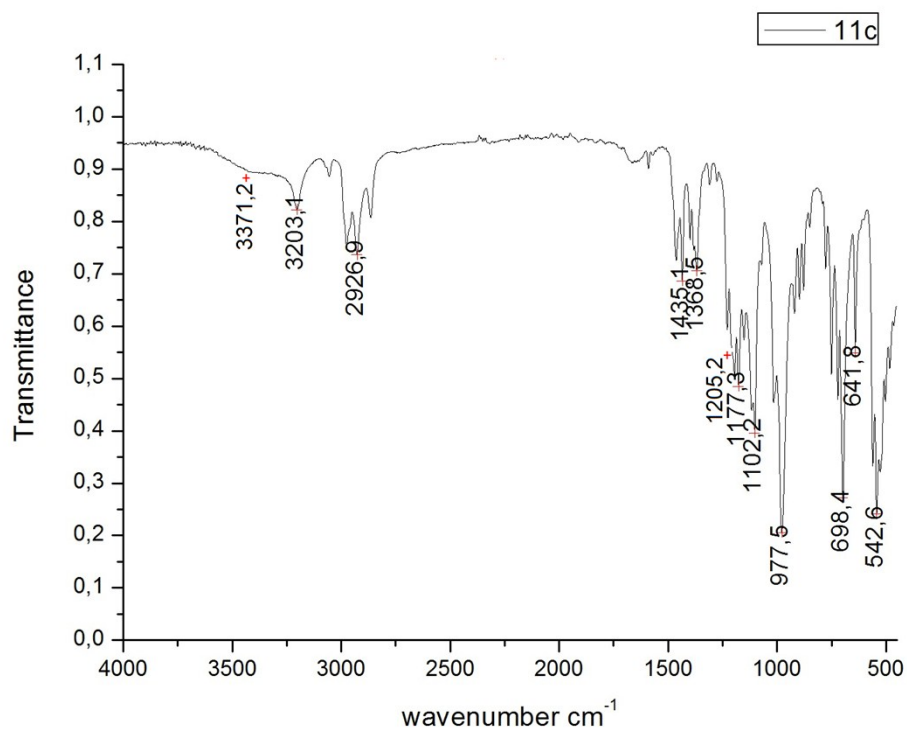

IR spectrum of **11c** in the presence of  $\text{ZnCl}_2$

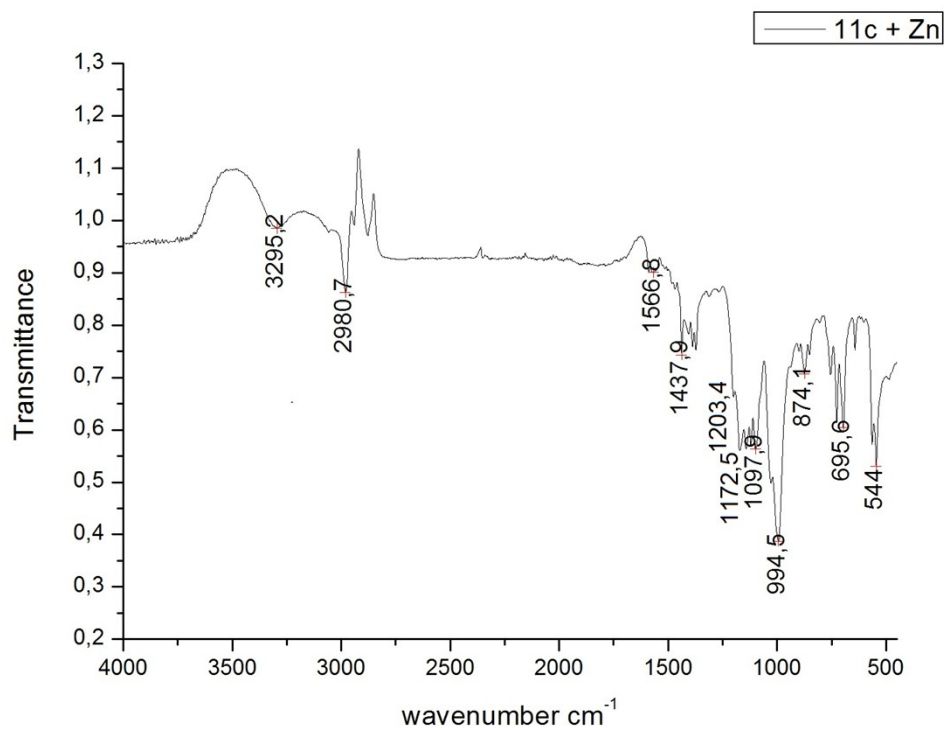

IR spectrum of **11c** in the presence of  $\text{CuSO}_4$

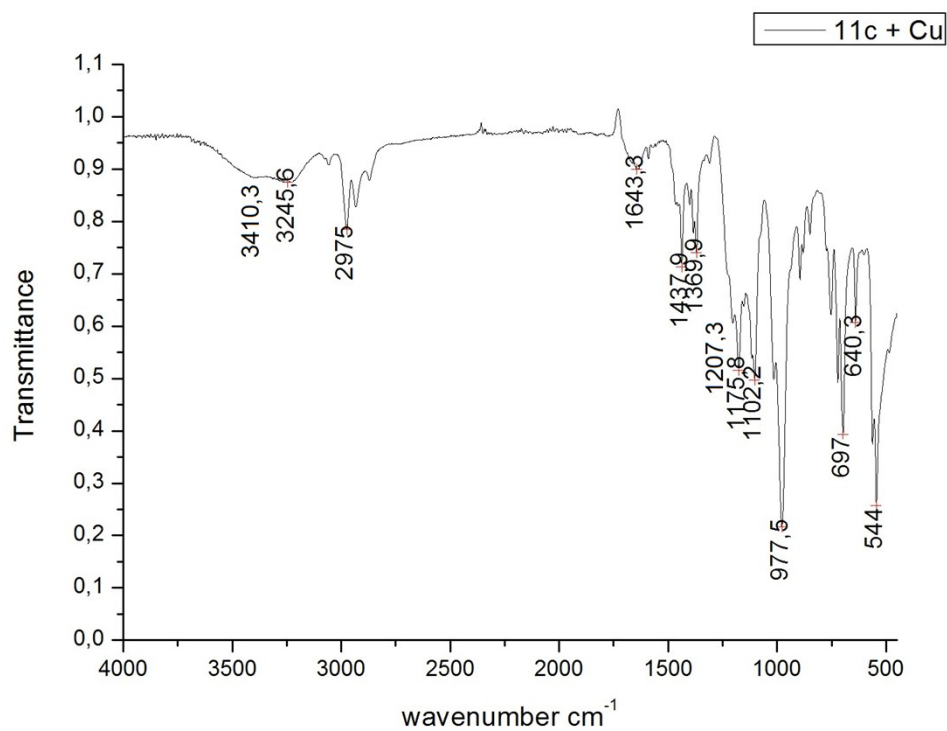

IR spectrum of **11c** in the presence of  $\text{Y}(\text{NO}_3)_3$

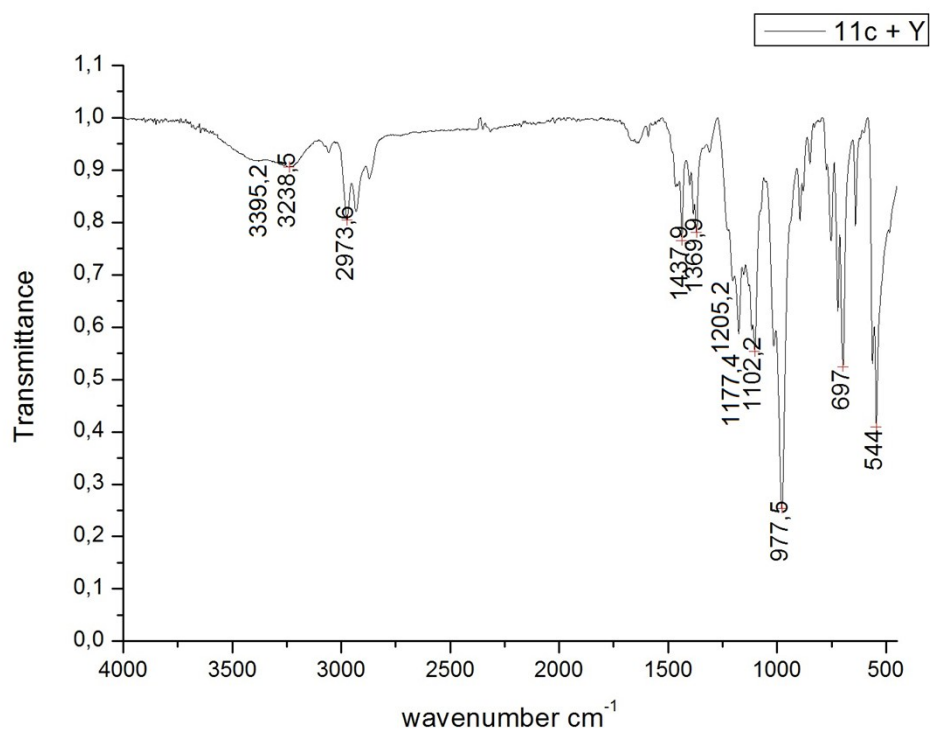

IR spectrum of **11d**

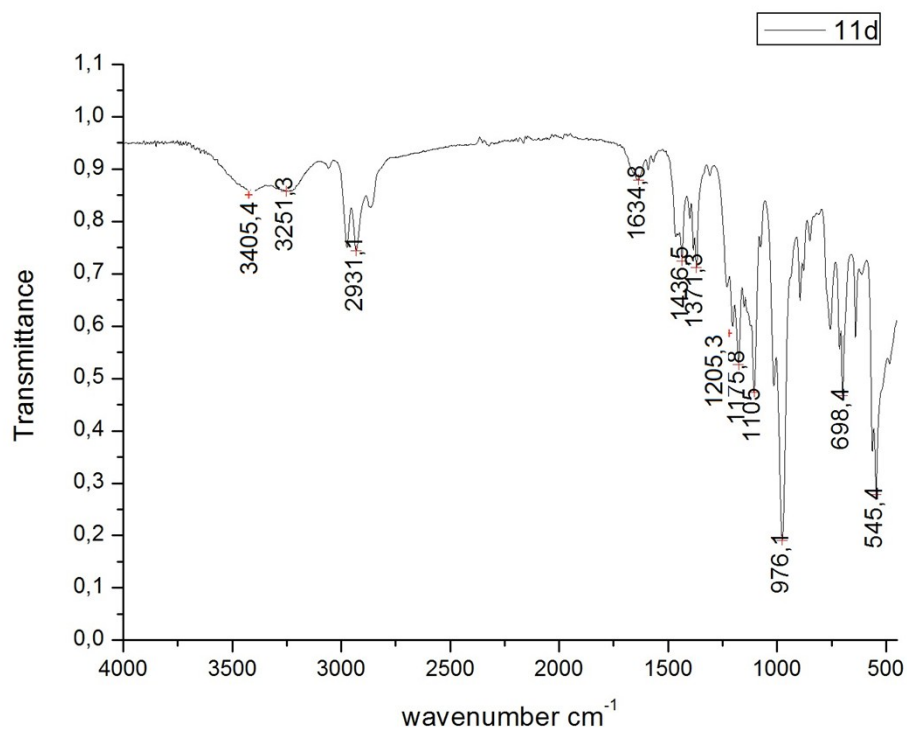

IR spectrum of **11d** in the presence of  $\text{ZnCl}_2$

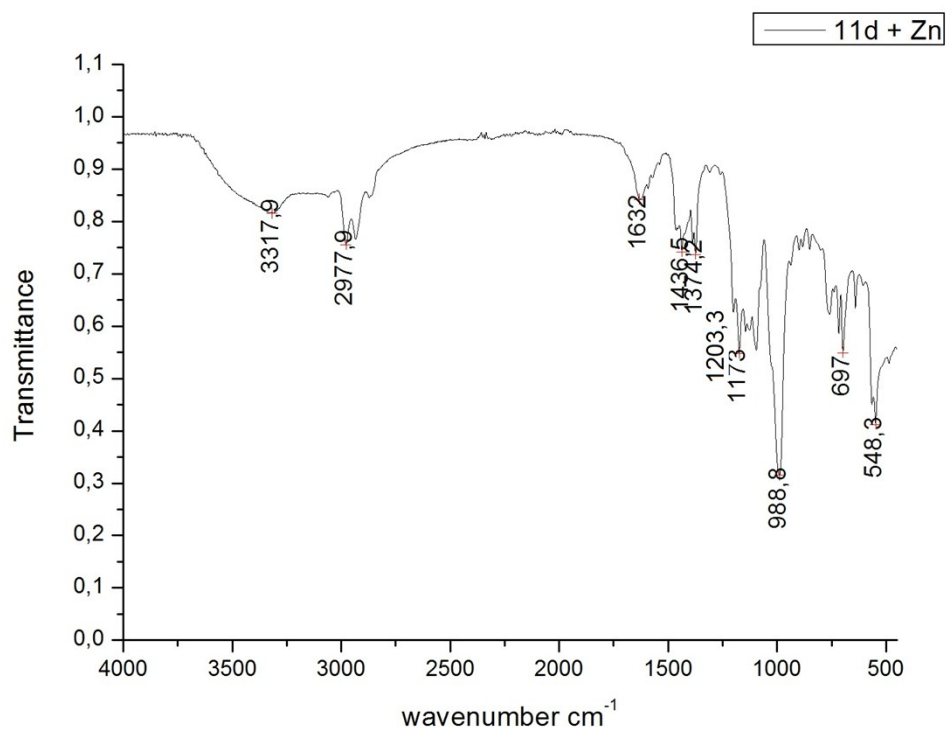

IR spectrum of **11d** in the presence of  $\text{CuSO}_4$

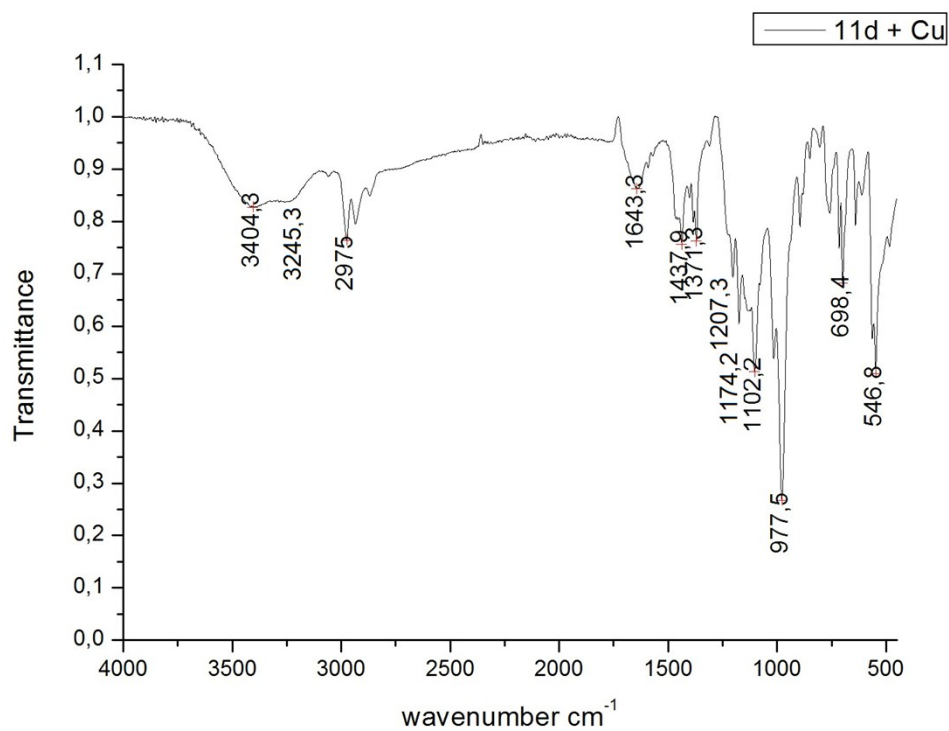

IR spectrum of **11d** in the presence of  $\text{Y}(\text{NO}_3)_3$

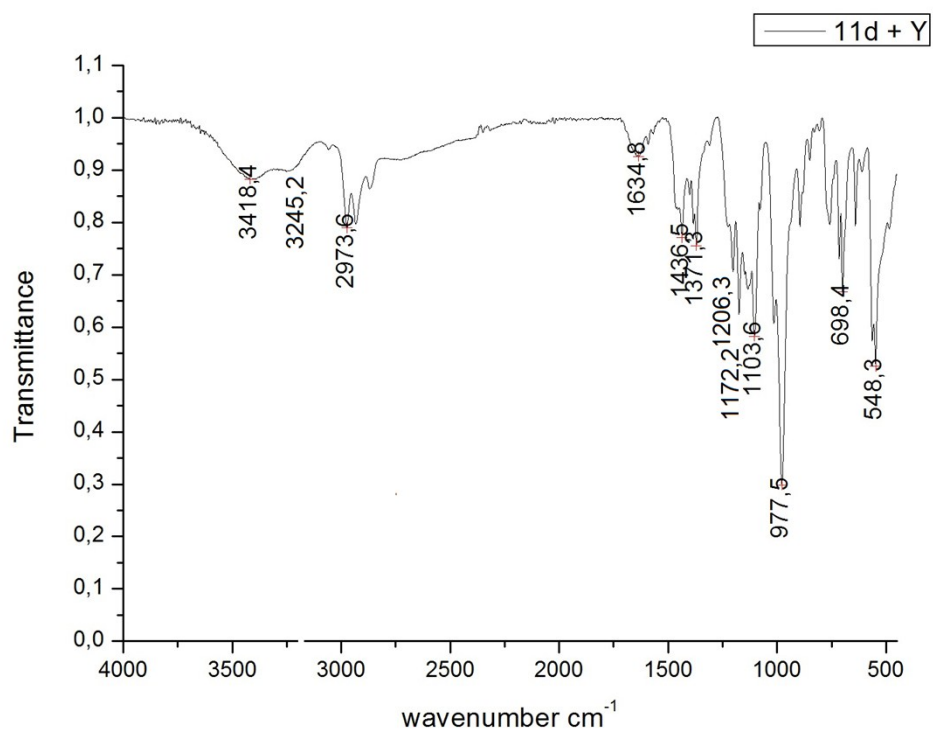

IR spectrum of **13a**

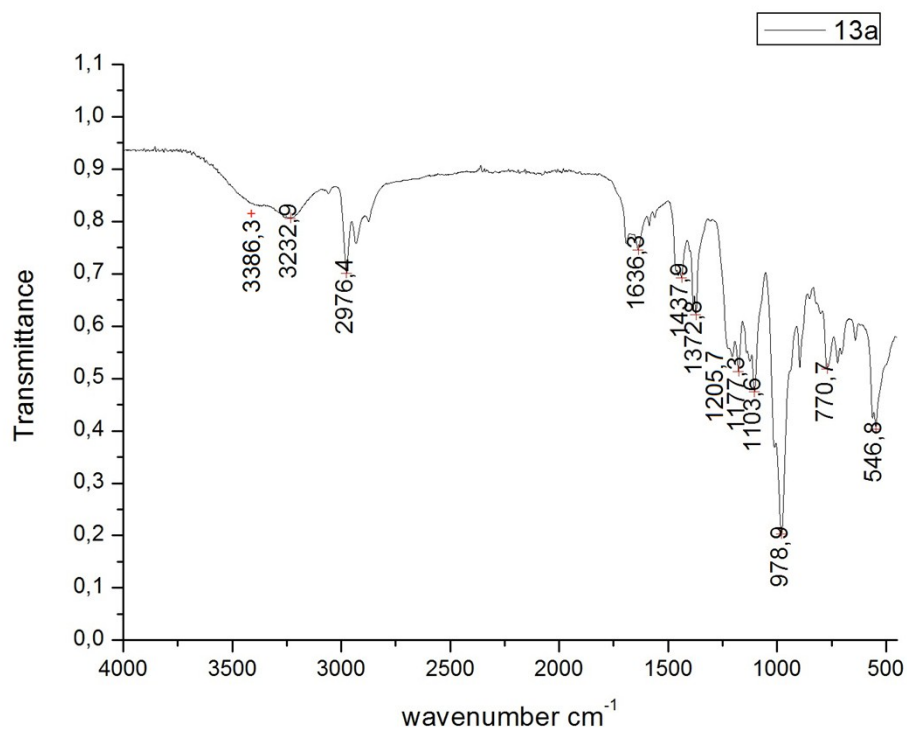

IR spectrum of **13a** in the presence of  $\text{ZnCl}_2$

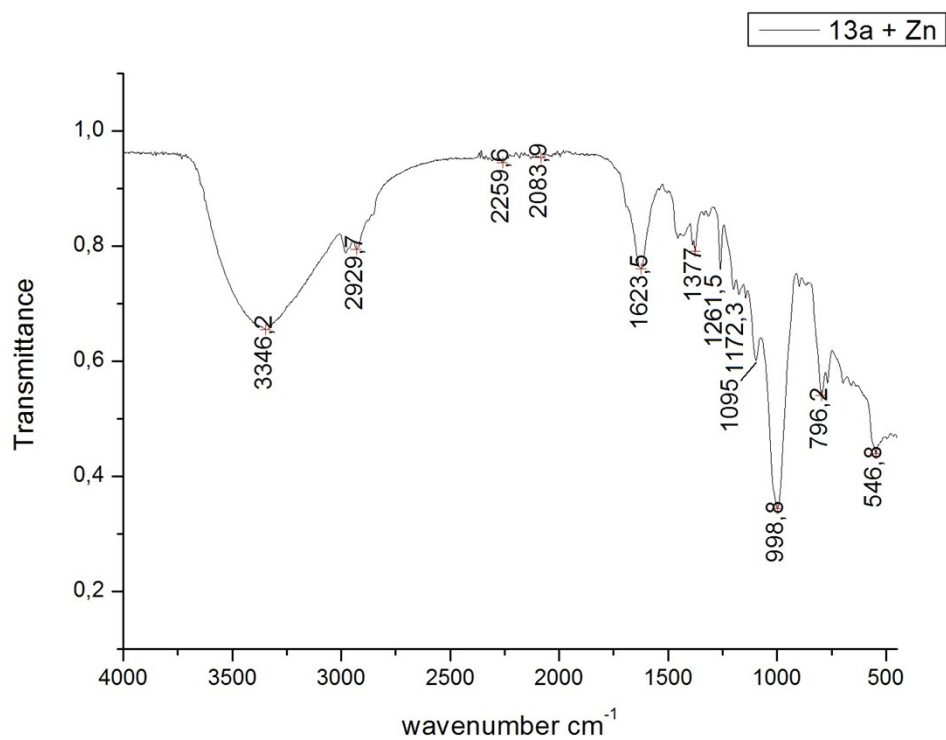

IR spectrum of **13a** in the presence of  $\text{CuSO}_4$

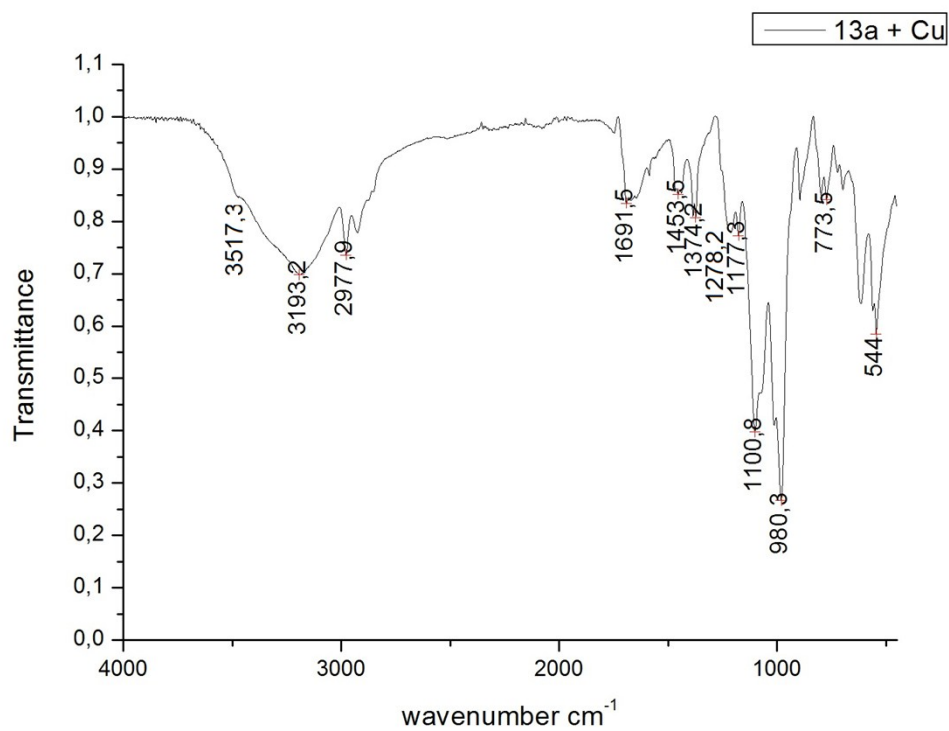

IR spectrum of **13a** in the presence of  $\text{Y}(\text{NO}_3)_3$

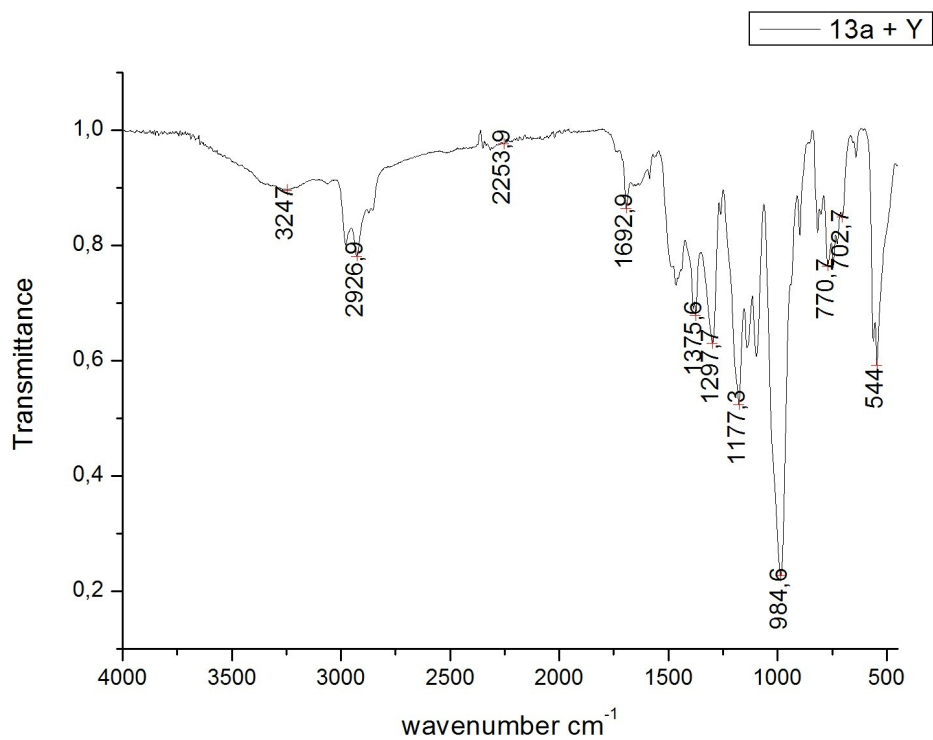

IR spectrum of **13b**

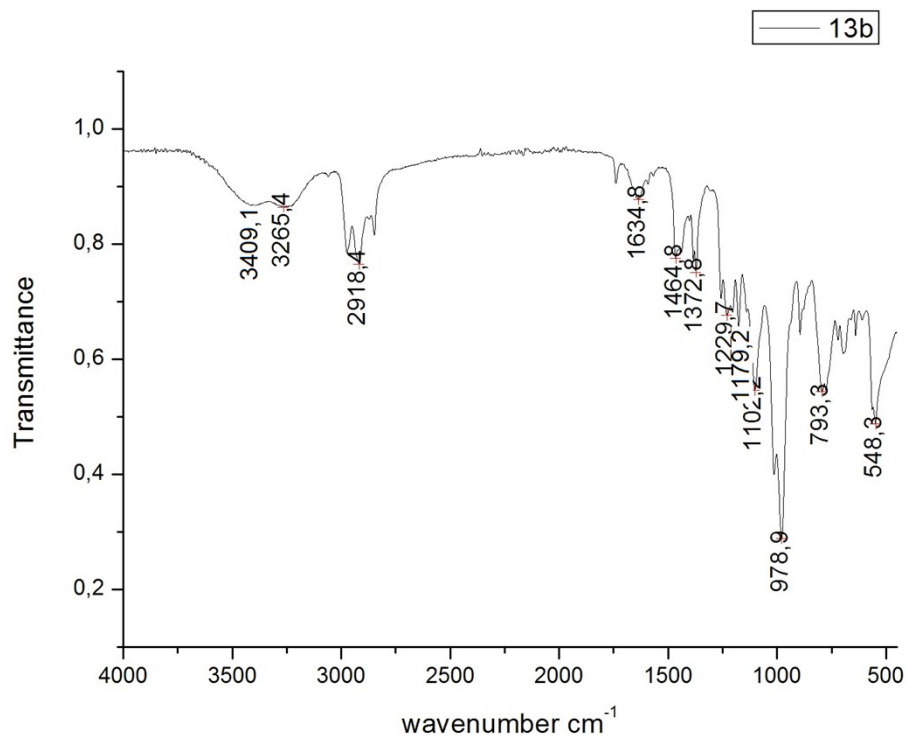

IR spectrum of **13b** in the presence of  $\text{ZnCl}_2$

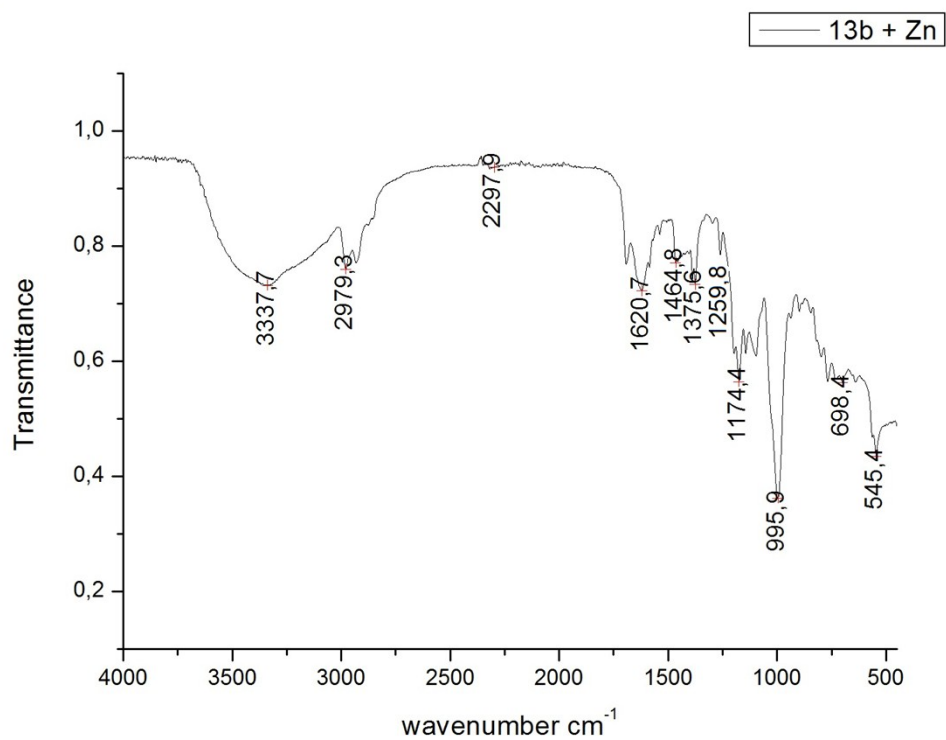

IR spectrum of **13b** in the presence of  $\text{CuSO}_4$

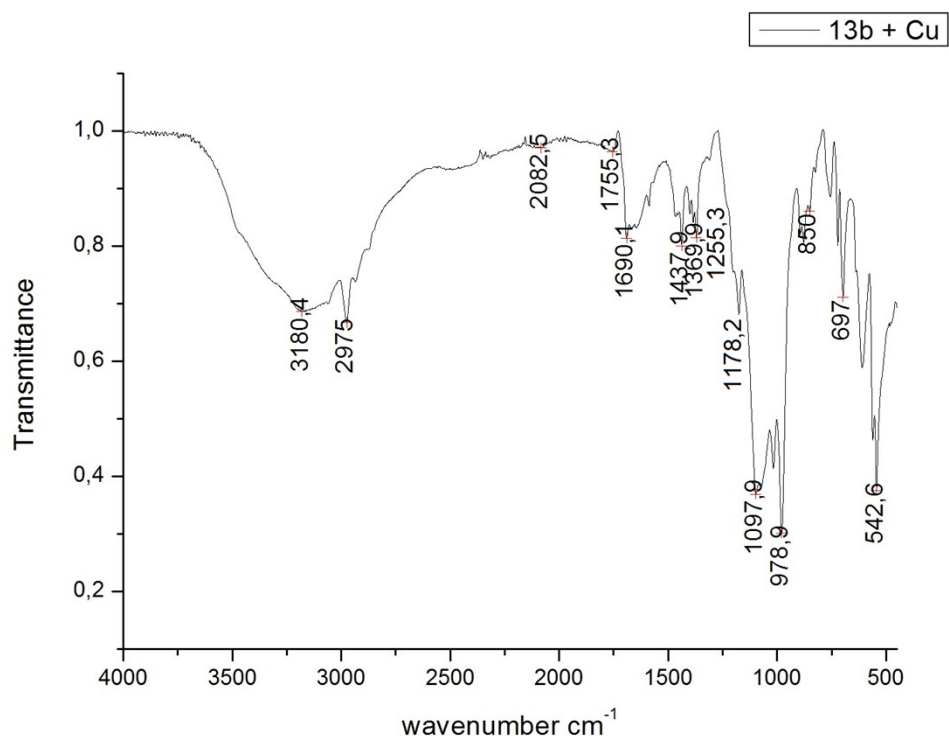

IR spectrum of **13b** in the presence of  $\text{Y}(\text{NO}_3)_3$

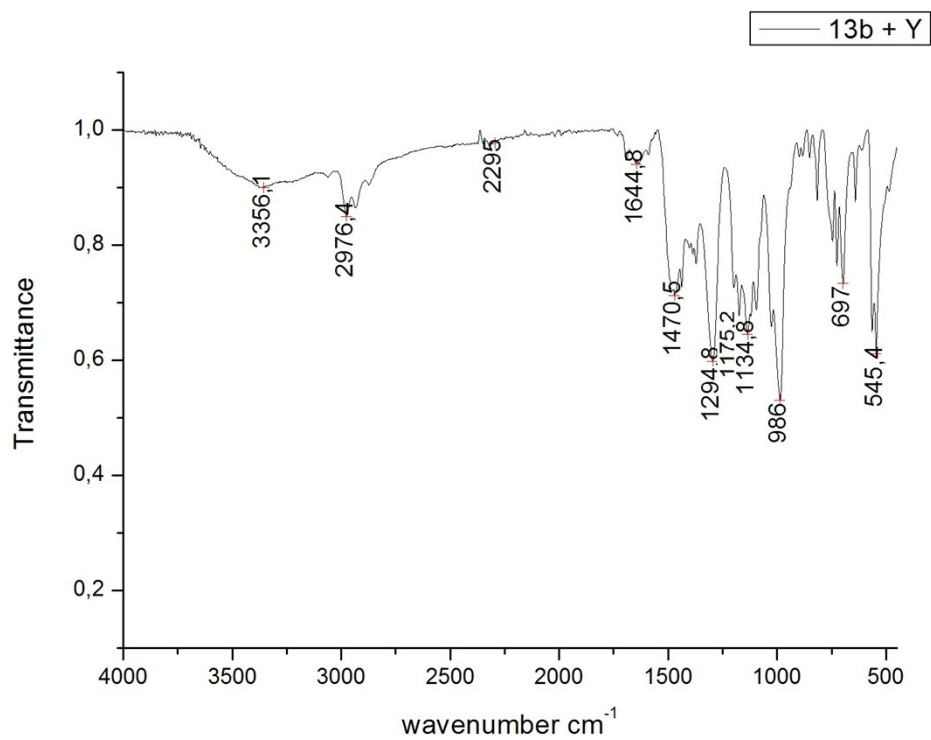



IR spectrum of **13c**

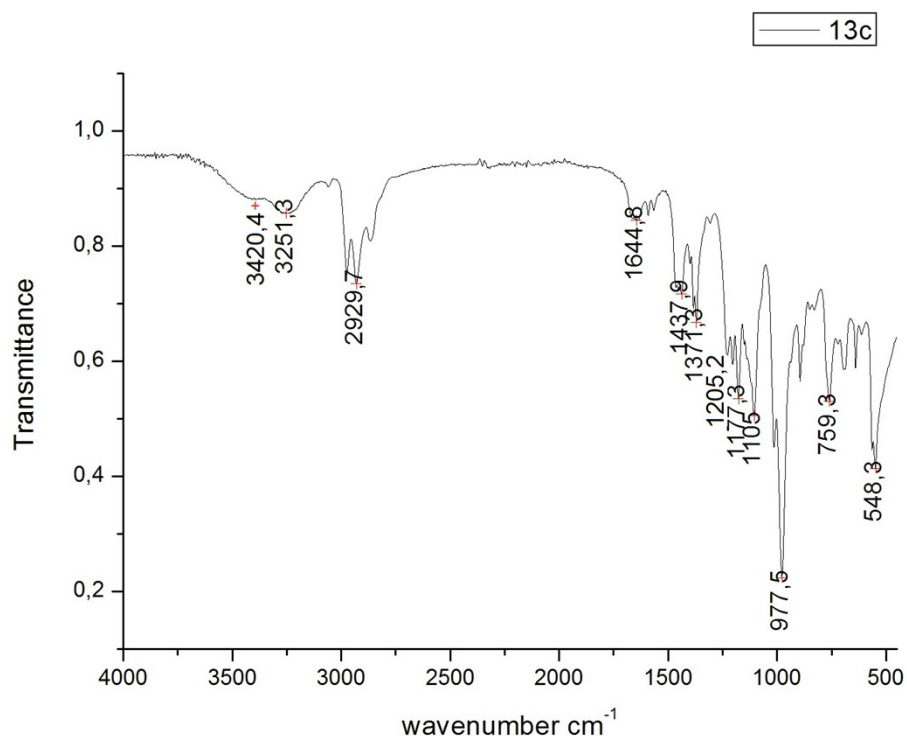

IR spectrum of **13c** in the presence of  $\text{ZnCl}_2$

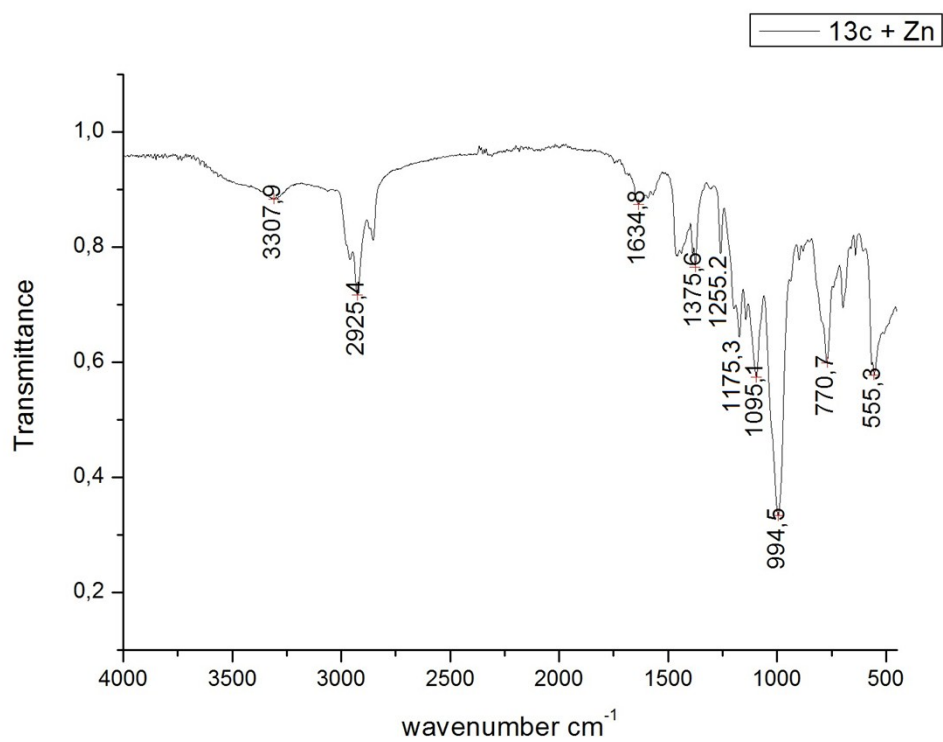

IR spectrum of **13c** in the presence of  $\text{CuSO}_4$

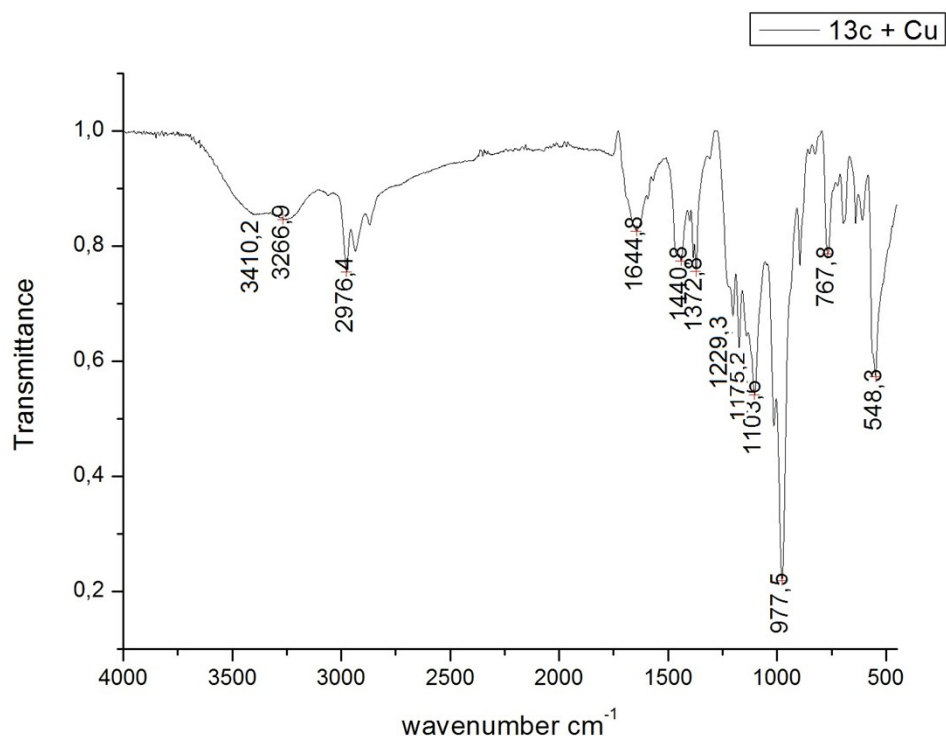

IR spectrum of **13c** in the presence of  $\text{Y}(\text{NO}_3)_3$

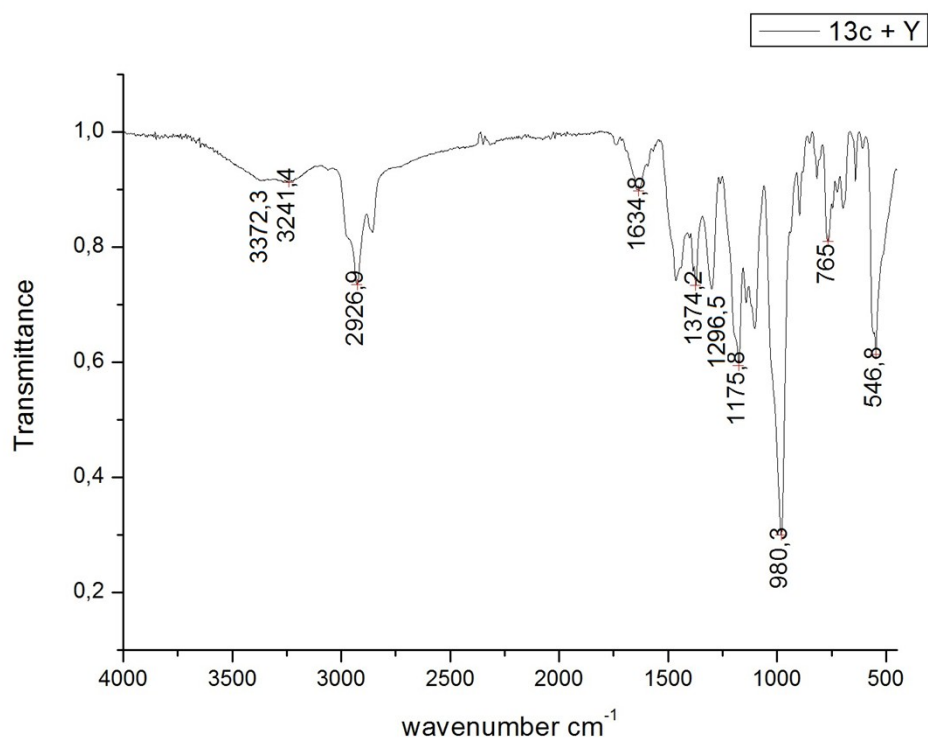

IR spectrum of **13d**

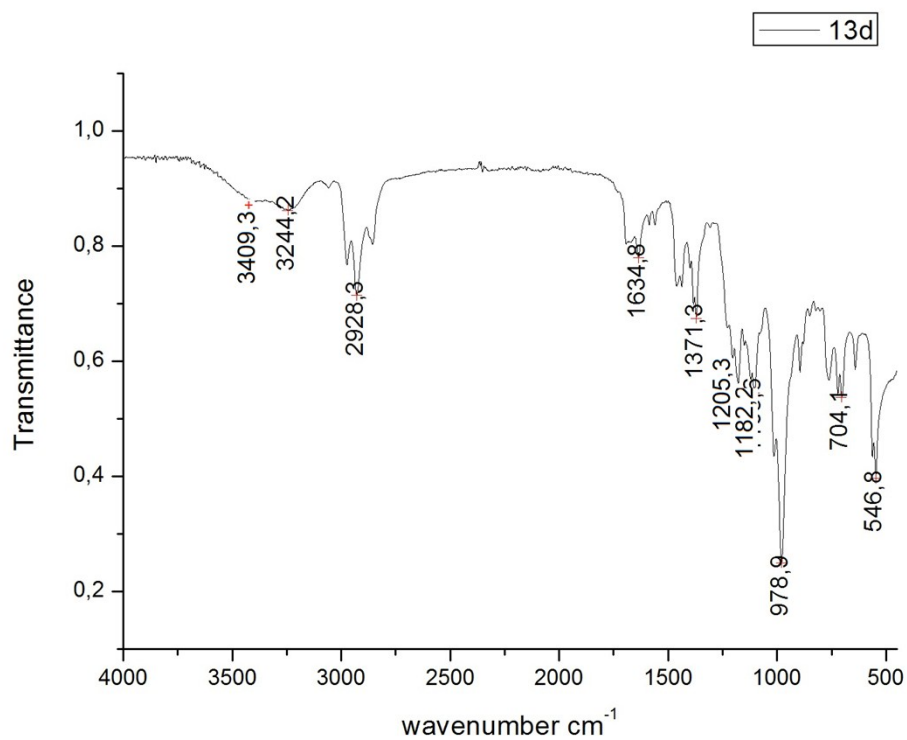

IR spectrum of **13d** in the presence of  $\text{ZnCl}_2$

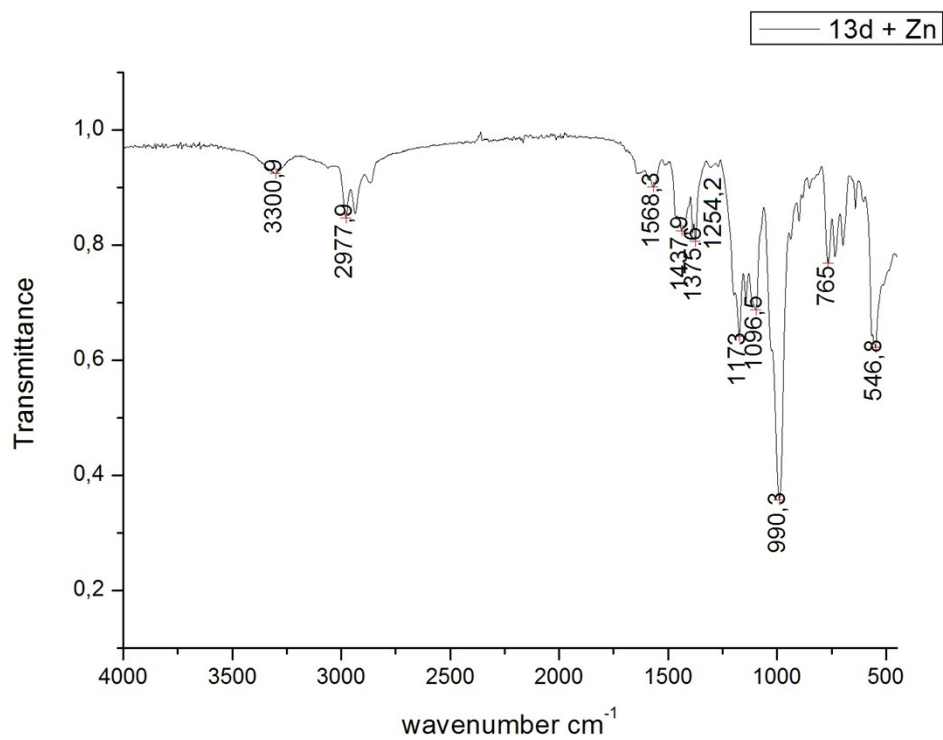

IR spectrum of **13d** in the presence of  $\text{CuSO}_4$

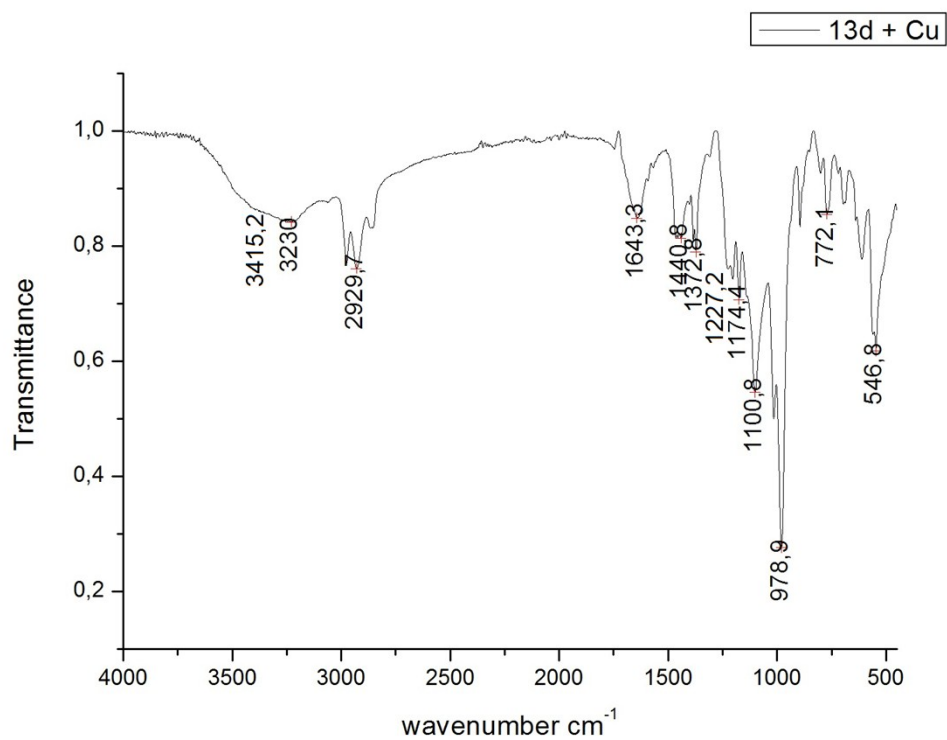

IR spectrum of **13d** in the presence of  $\text{Y}(\text{NO}_3)_3$

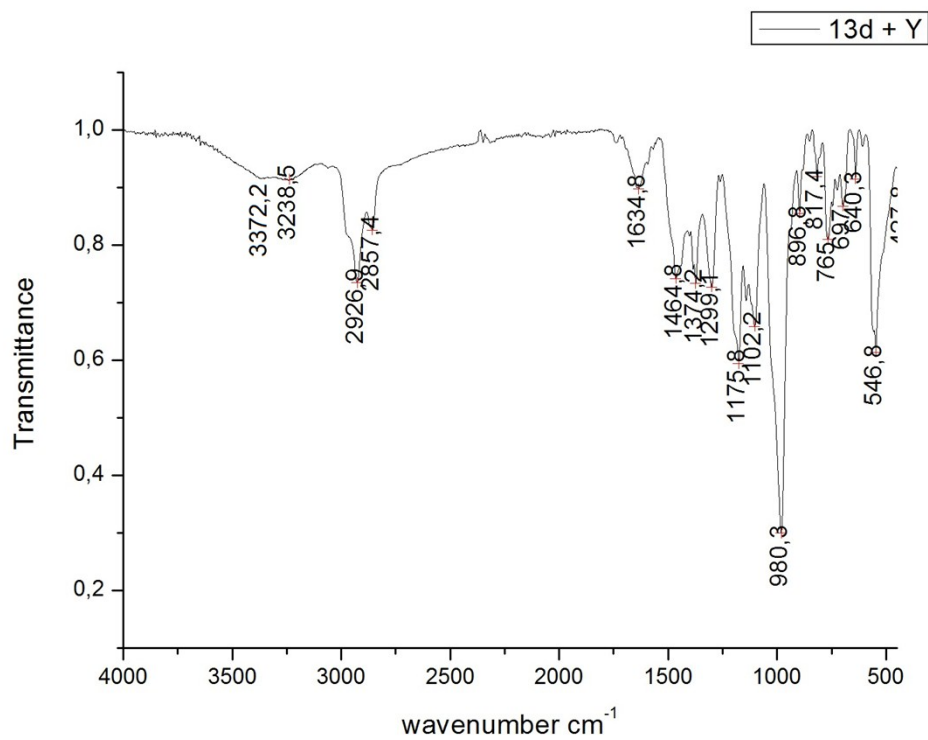

### 3) Spectrofluorimetric spectra

**6a** in the presence of  $\text{ZnCl}_2$

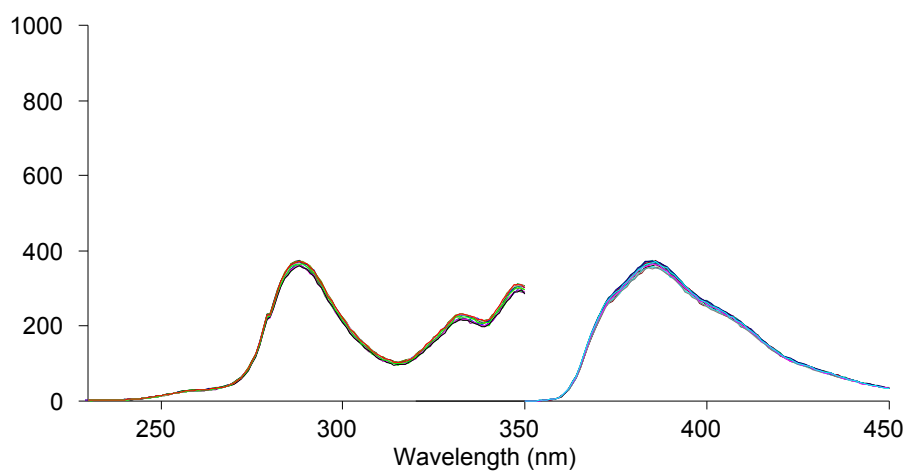

**6a** in the presence of  $\text{CuSO}_4$

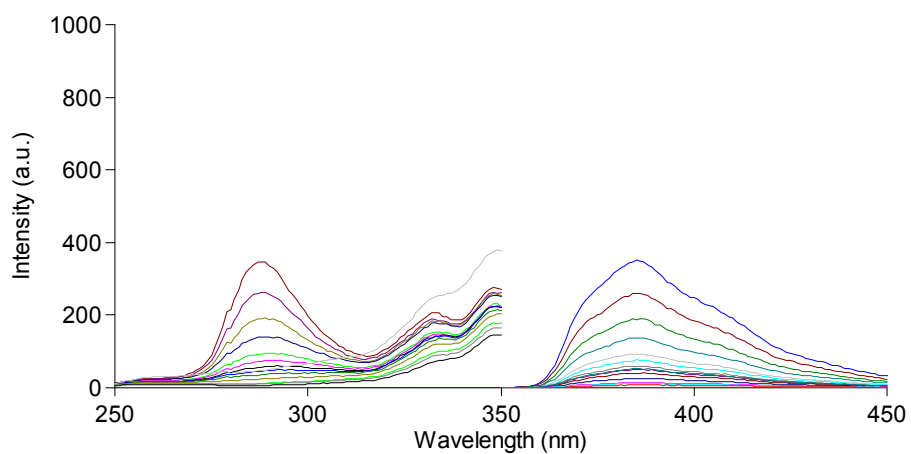

**6a** in the presence of  $\text{Y}(\text{NO}_3)_3$

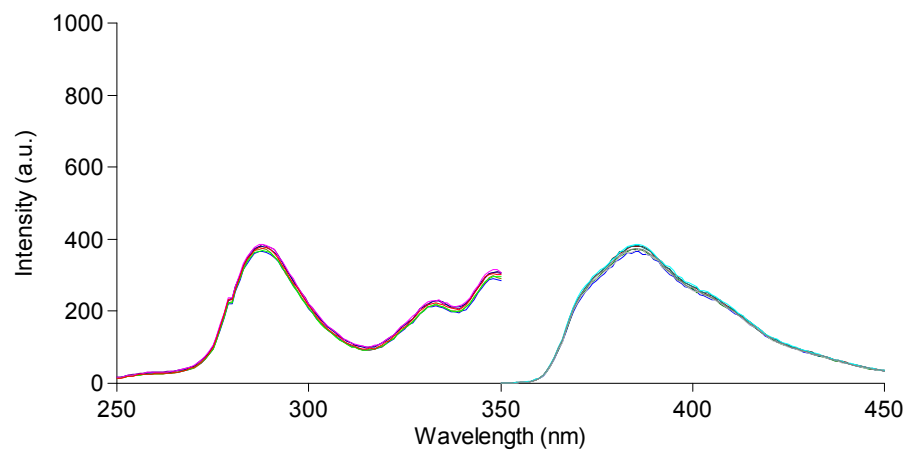

**6b** in the presence of  $\text{ZnCl}_2$

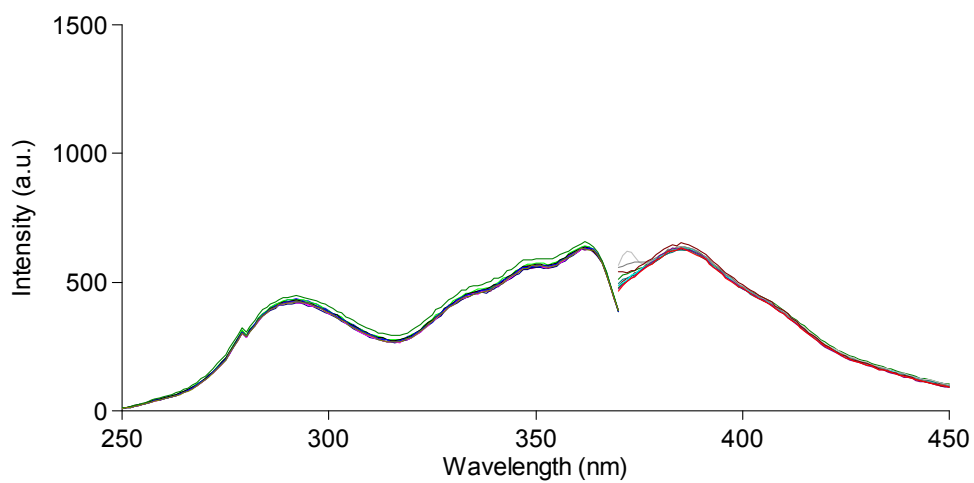

**6b** in the presence of  $\text{CuSO}_4$

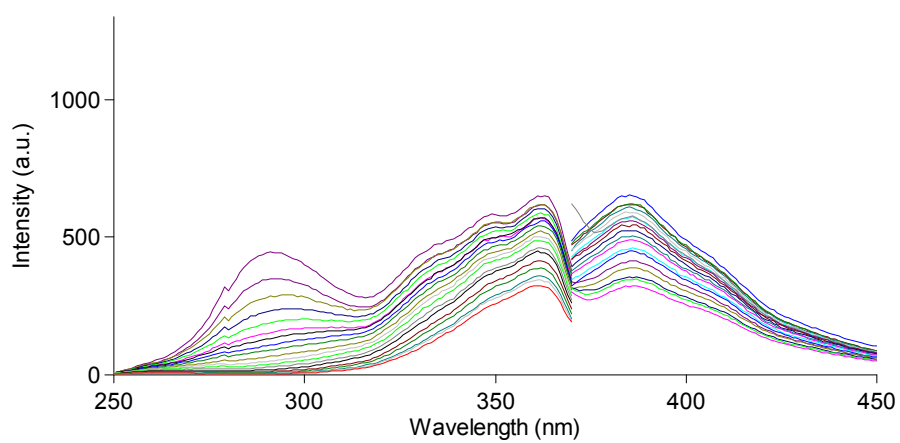

**6b** in the presence of  $\text{Y}(\text{NO}_3)_3$

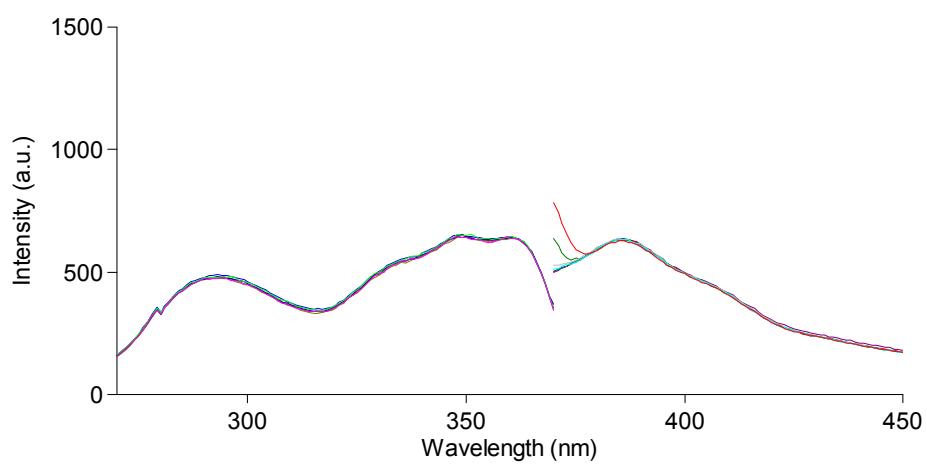

**6c** in the presence of  $\text{ZnCl}_2$

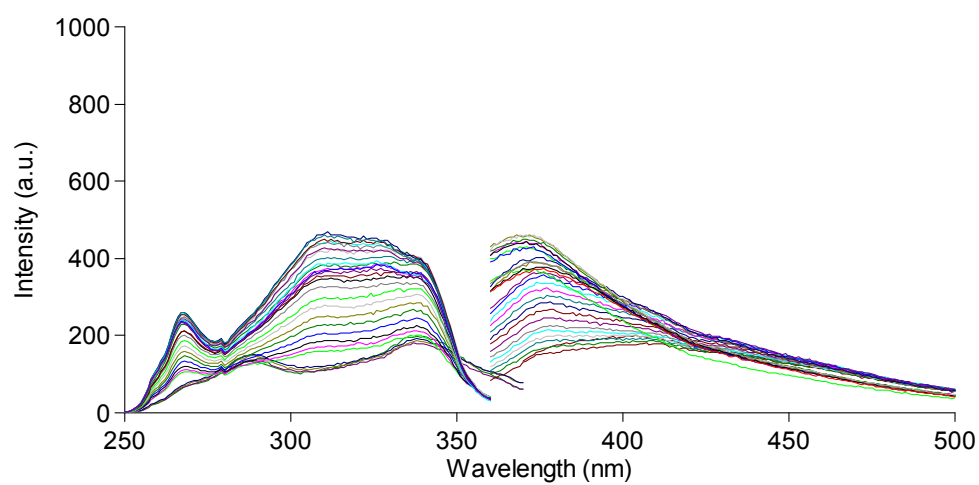

**6c** in the presence of  $\text{CuSO}_4$

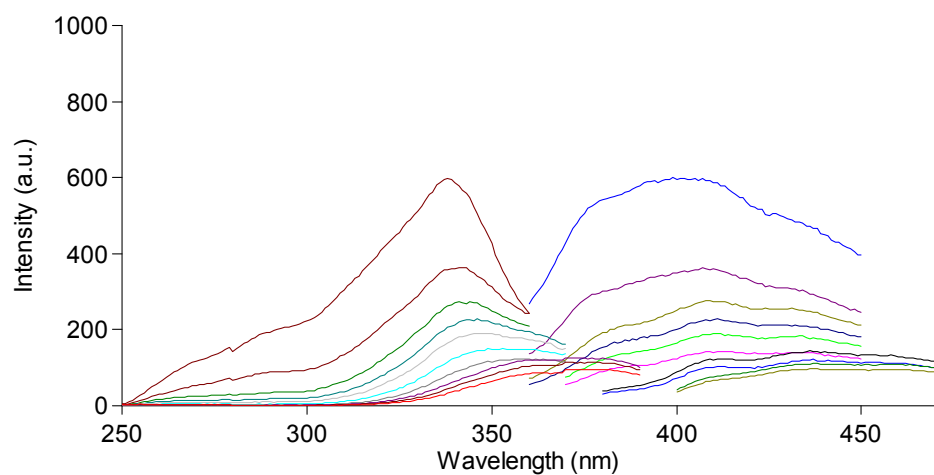

**6c** in the presence of  $\text{Y}(\text{NO}_3)_3$

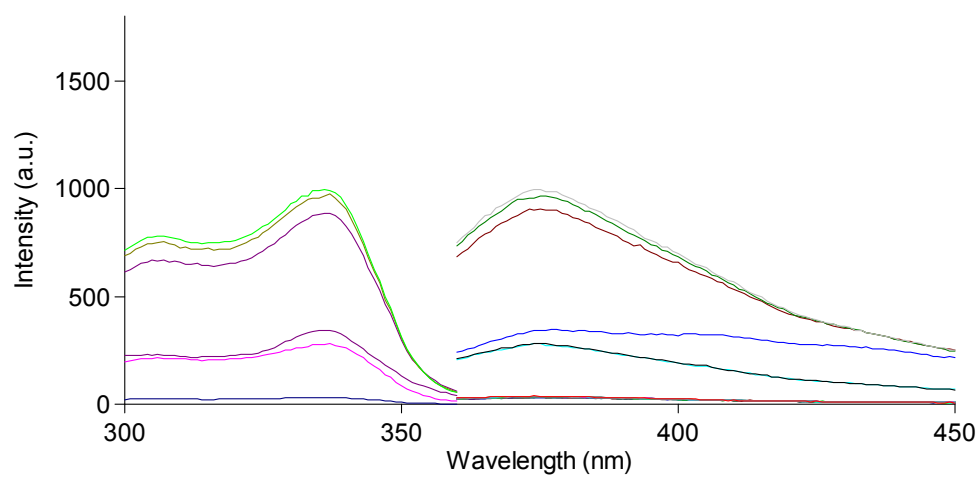

**8a** in the presence of  $\text{ZnCl}_2$

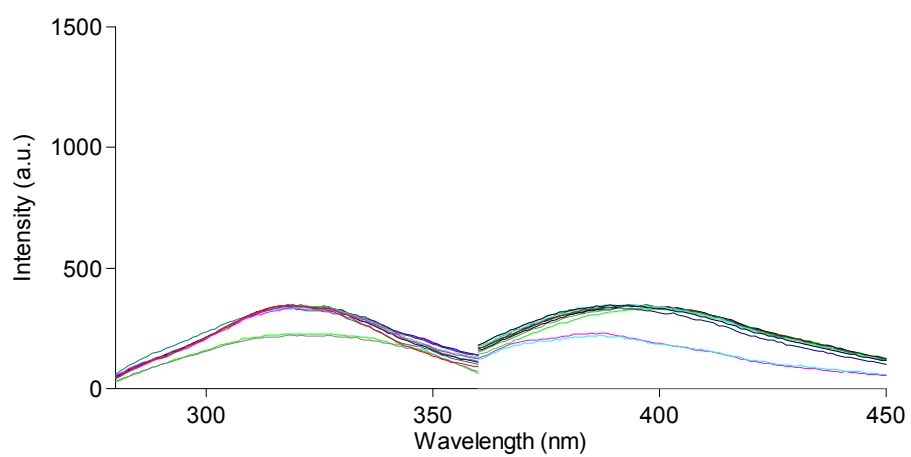

**8a** in the presence of  $\text{CuSO}_4$

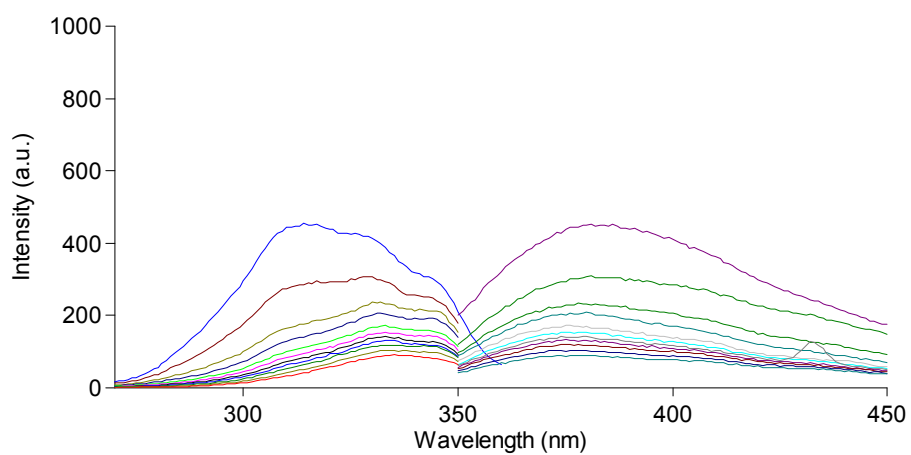

**8a** in the presence of  $\text{Y}(\text{NO}_3)_3$

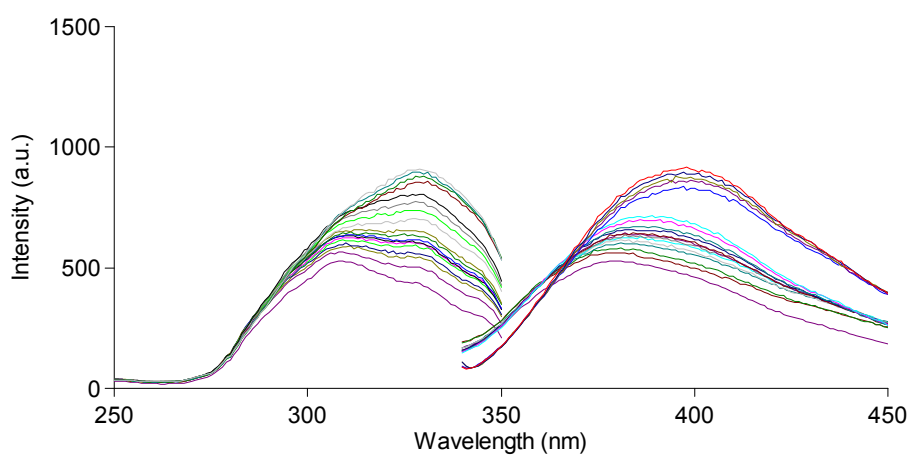



**8b** in the presence of  $\text{ZnCl}_2$

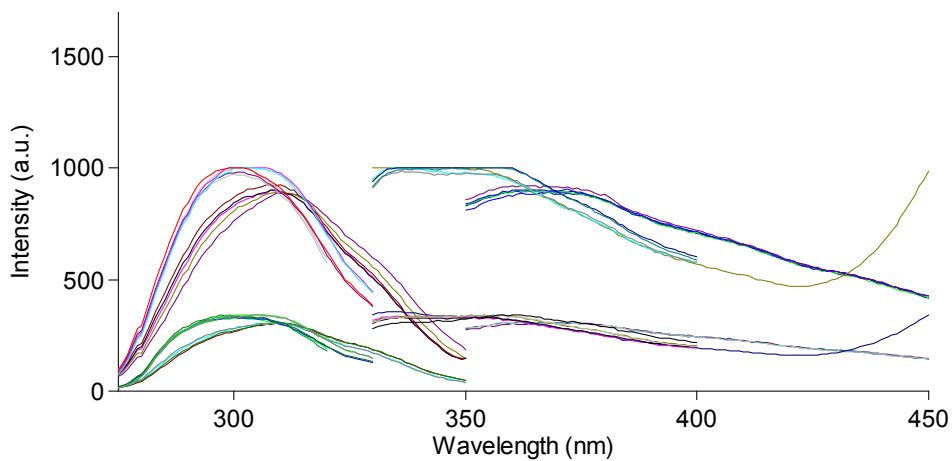

**8b** in the presence of  $\text{CuSO}_4$

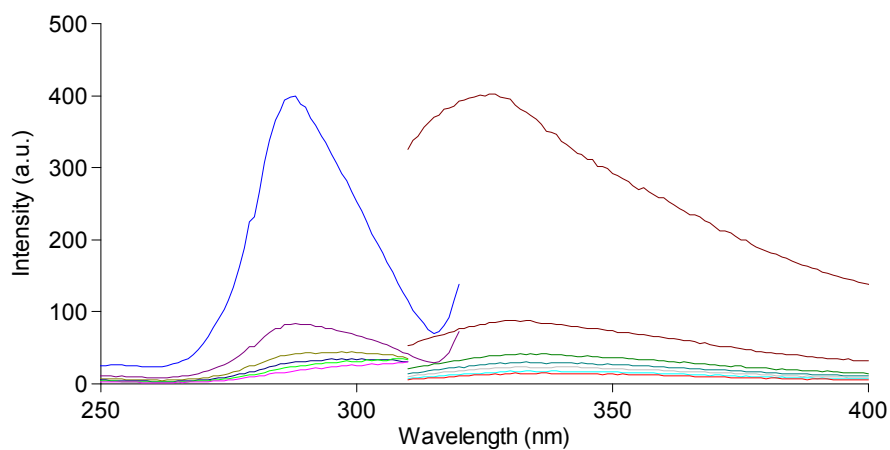

**8b** in the presence of  $\text{Y}(\text{NO}_3)_3$

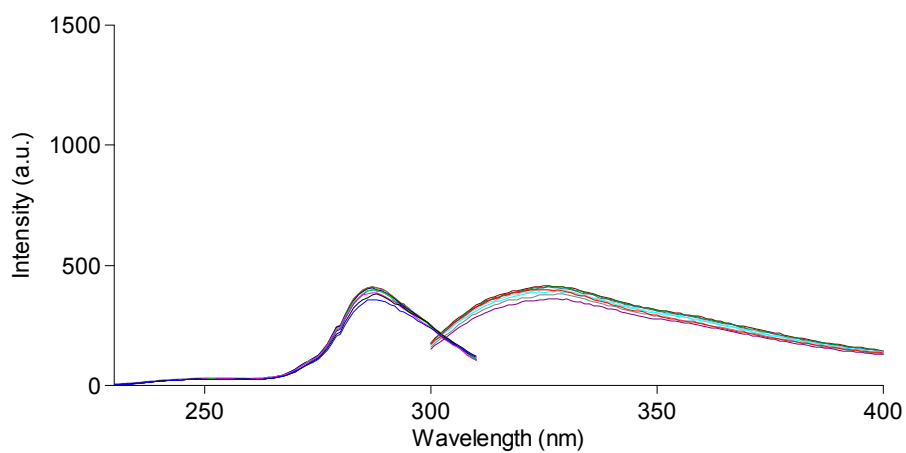

**11a** in the presence of  $ZnCl_2$

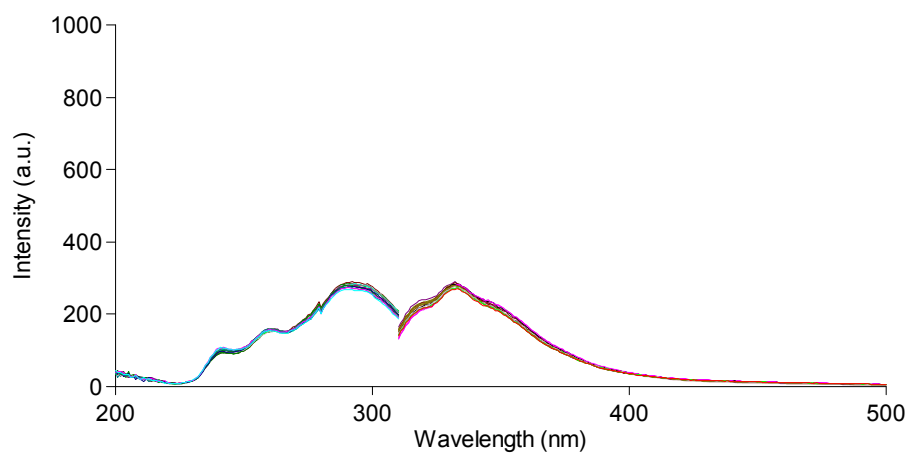

**11a** in the presence of  $CuSO_4$

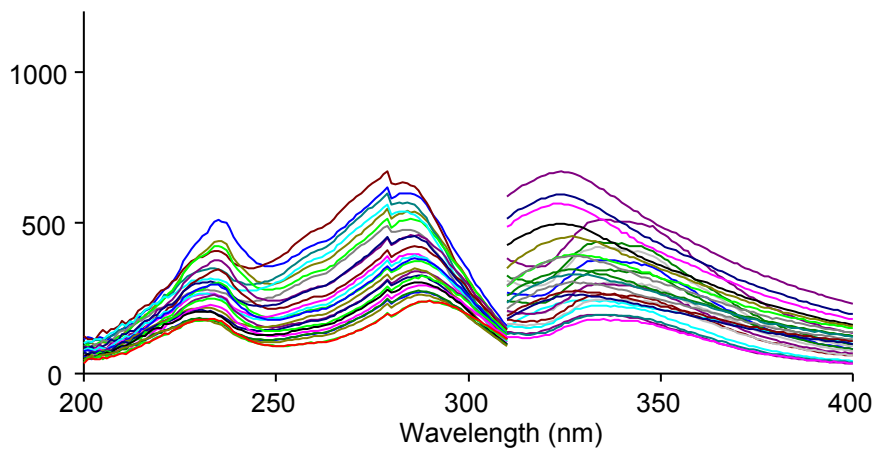

**11a** in the presence of  $Y(NO_3)_3$

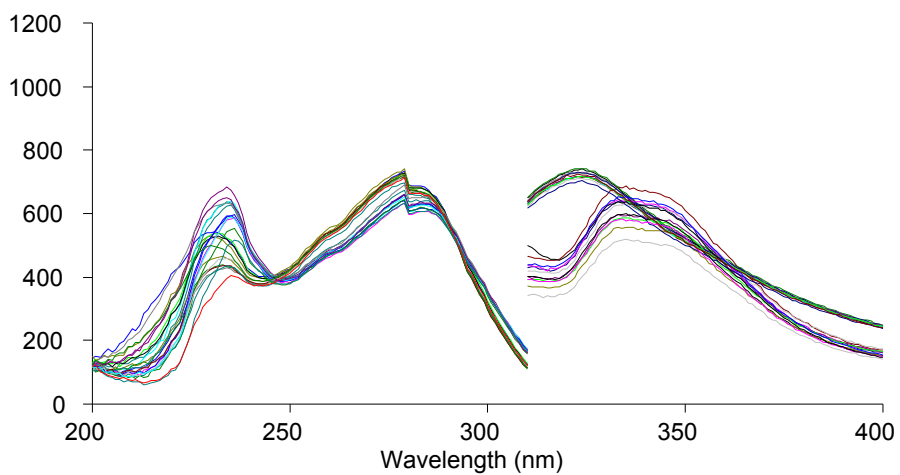

**11a** in

**11b** in the presence of  $\text{ZnCl}_2$

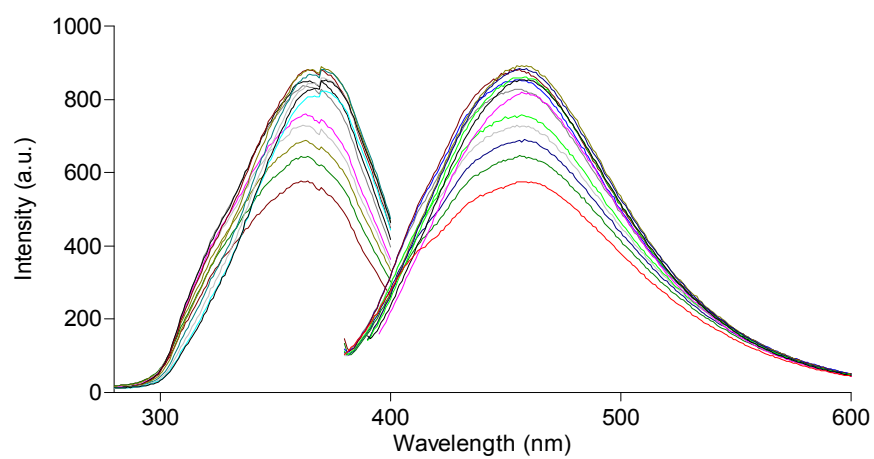

**11b** in the presence of  $\text{CuSO}_4$

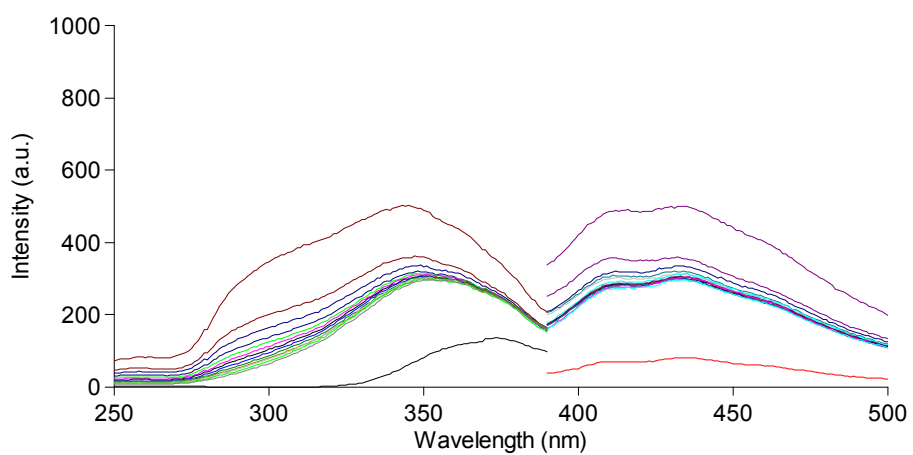

**11b** in the presence of  $\text{Y}(\text{NO}_3)_3$

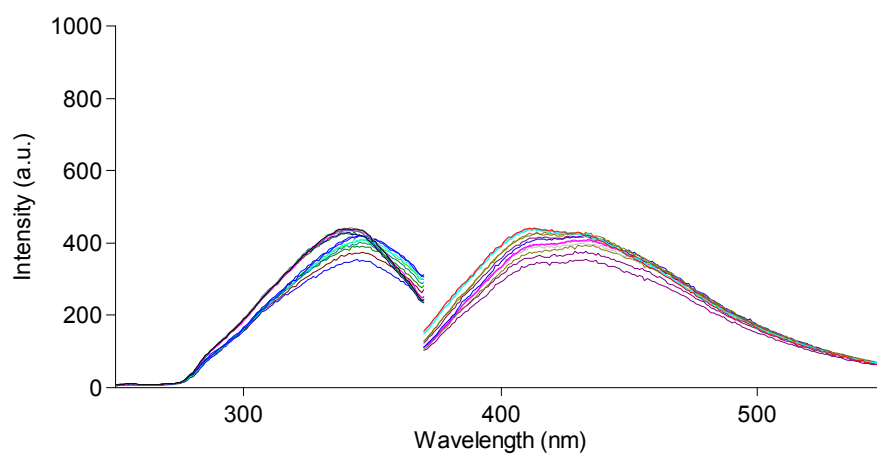

**11c** in the presence of  $\text{ZnCl}_2$

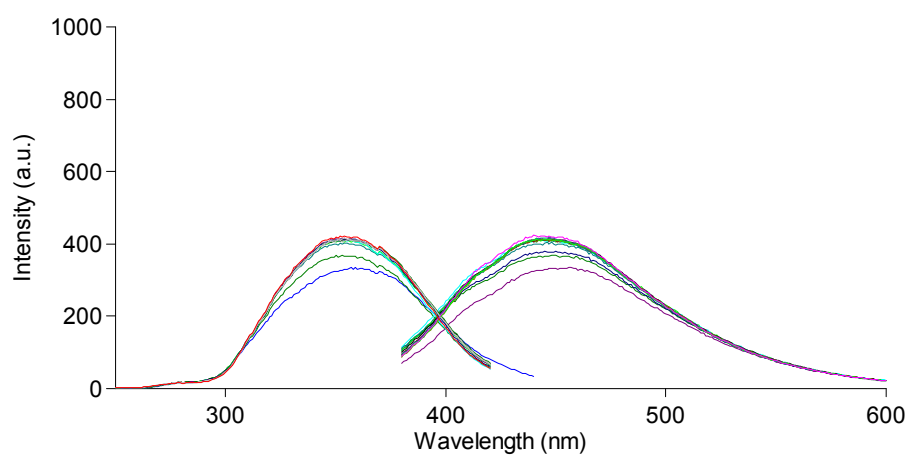

**11c** in the presence of  $\text{CuSO}_4$

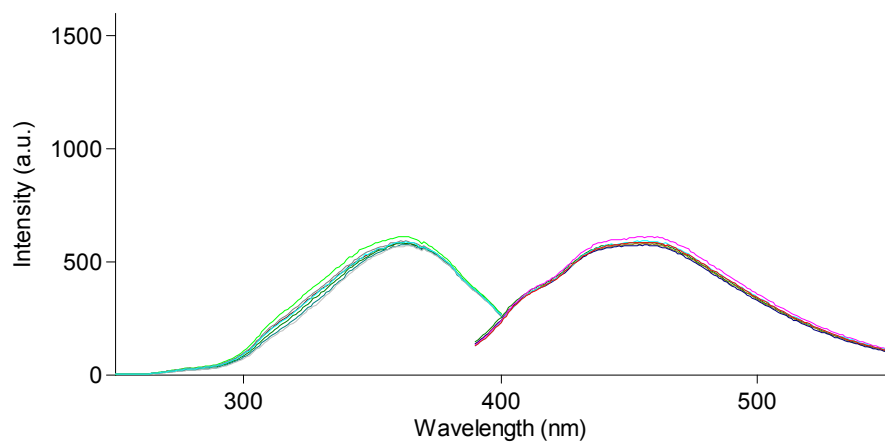

**11c** in the presence of  $\text{Y}(\text{NO}_3)_3$

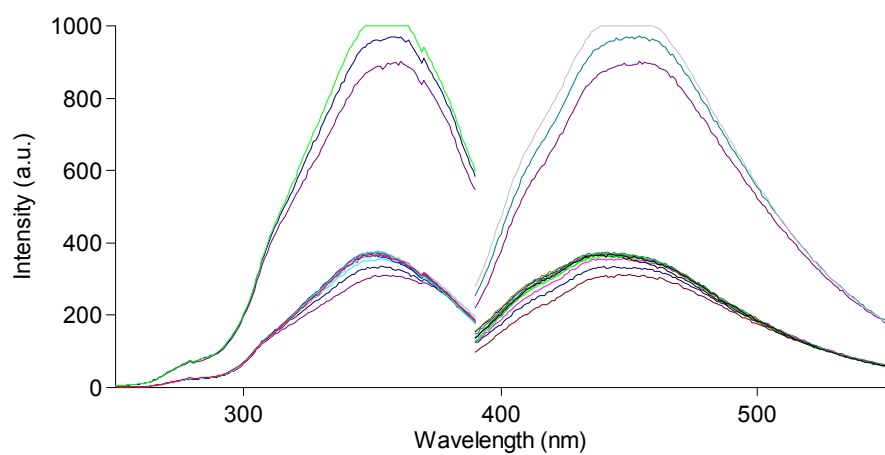

**11d** in the presence of  $\text{ZnCl}_2$

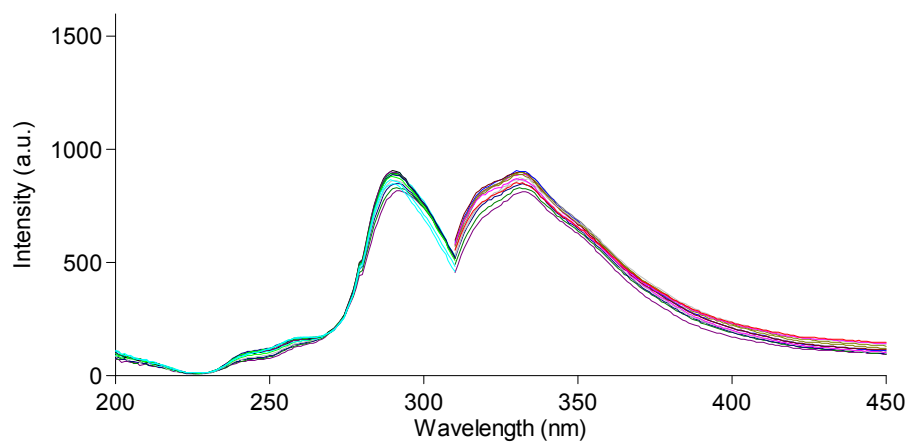

**11d** in the presence of  $\text{CuSO}_4$

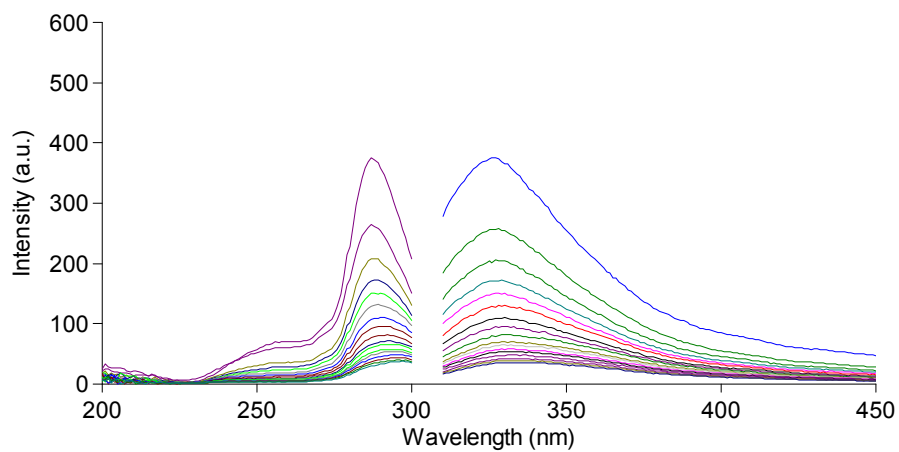

**11d** in the presence of  $\text{Y}(\text{NO}_3)_3$

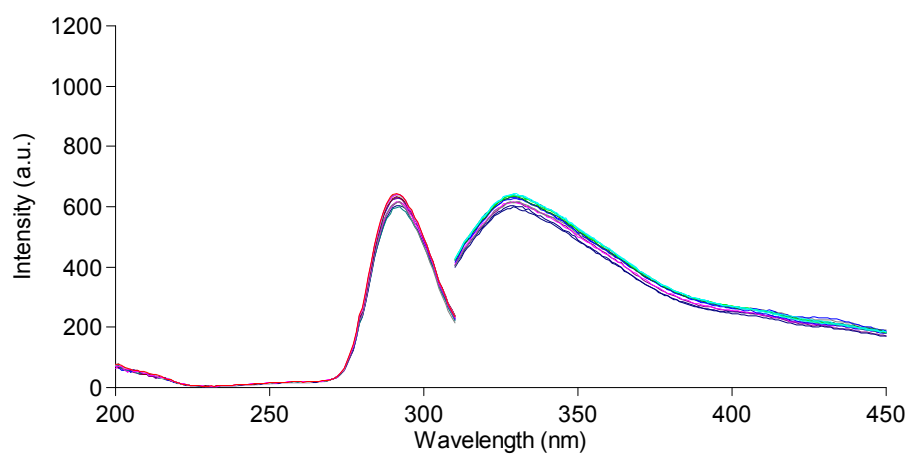

**13a** in the presence of  $\text{ZnCl}_2$

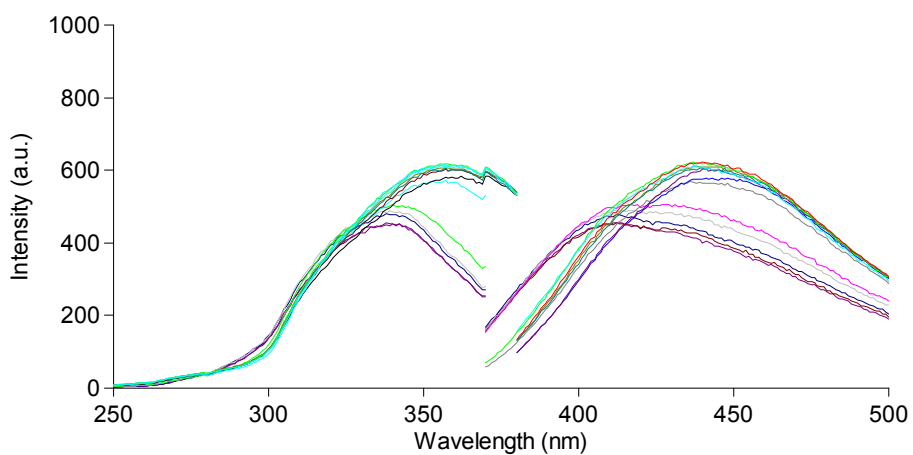

**13a** in the presence of  $\text{CuSO}_4$

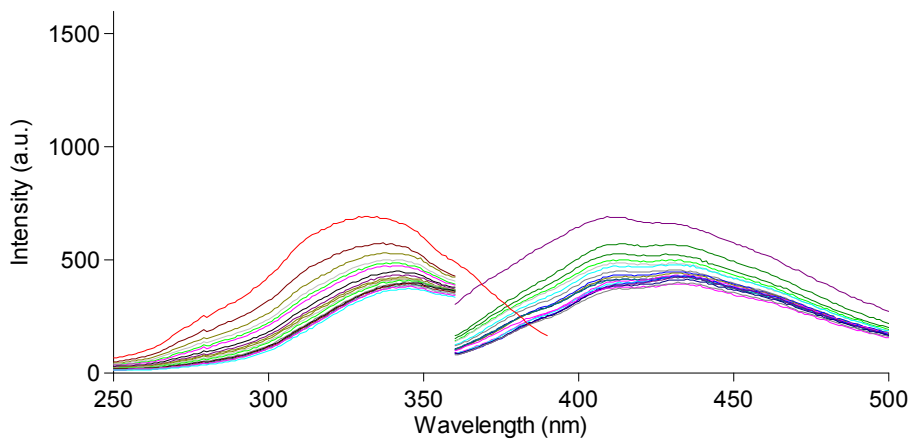

**13a** in the presence of  $\text{Y}(\text{NO}_3)_3$

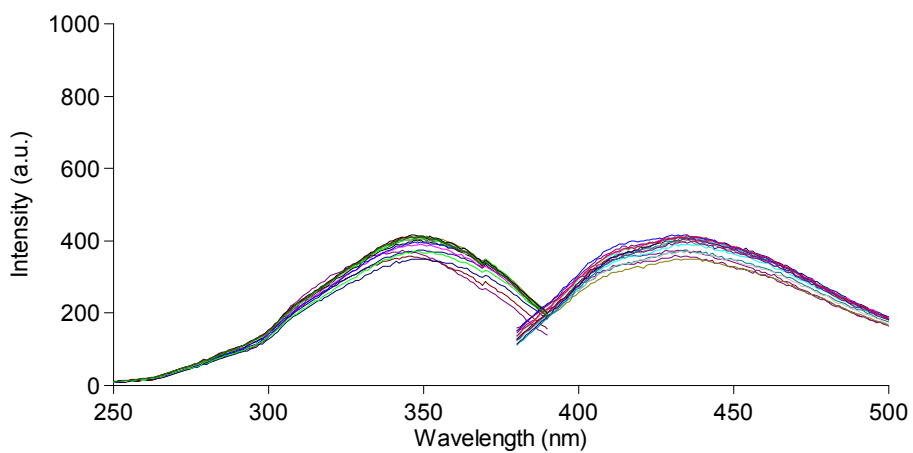

**13b** in the presence of  $\text{CuSO}_4$

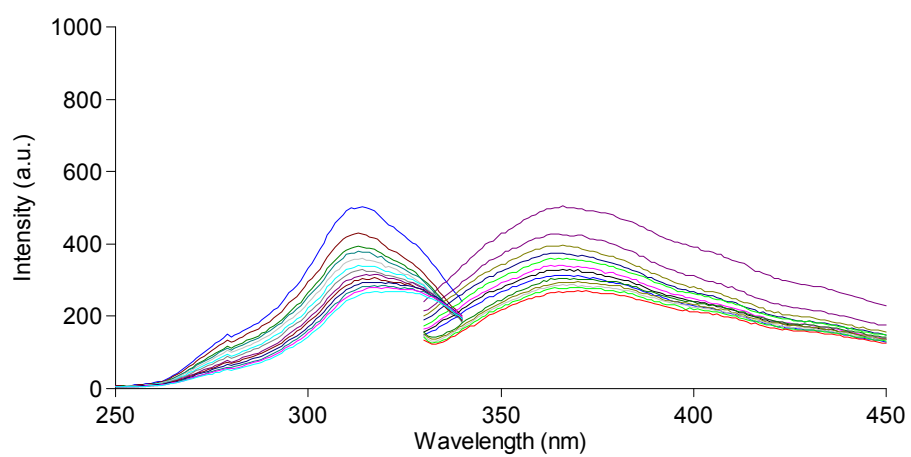

**13b** in the presence of  $\text{Y}(\text{NO}_3)_3$

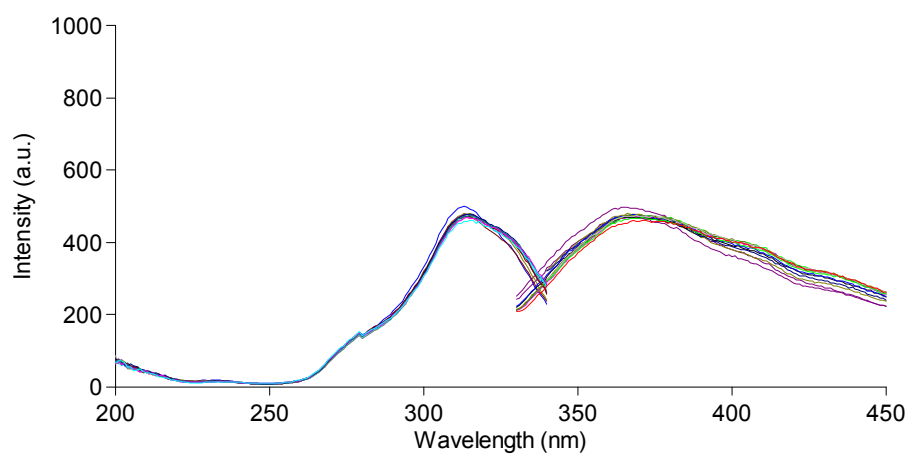

**13c** in the presence of  $\text{ZnCl}_2$

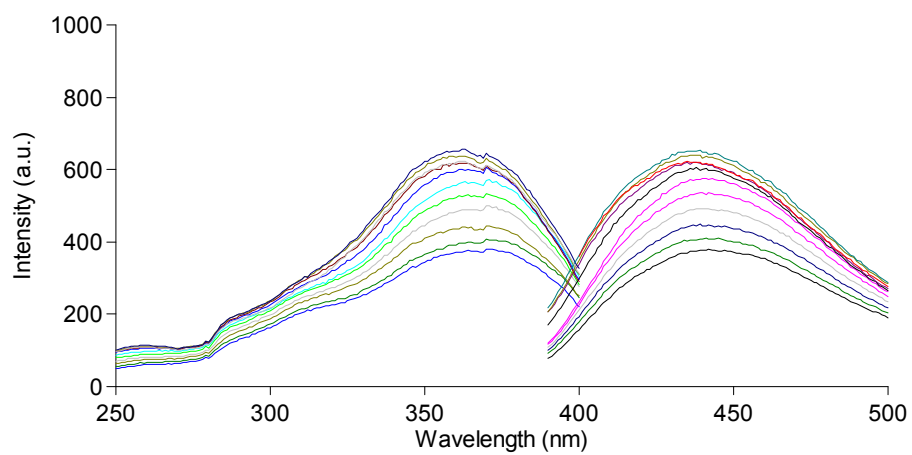

**13c** in the presence of  $\text{CuSO}_4$

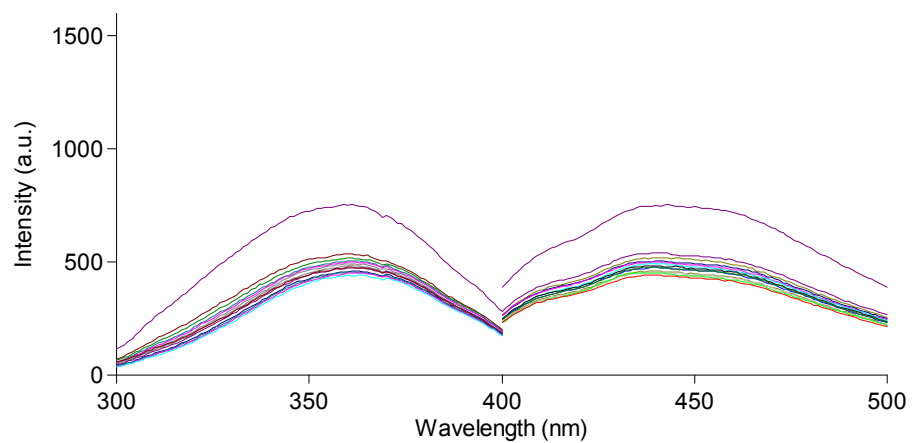

**13c** in the presence of  $\text{Y}(\text{NO}_3)_3$

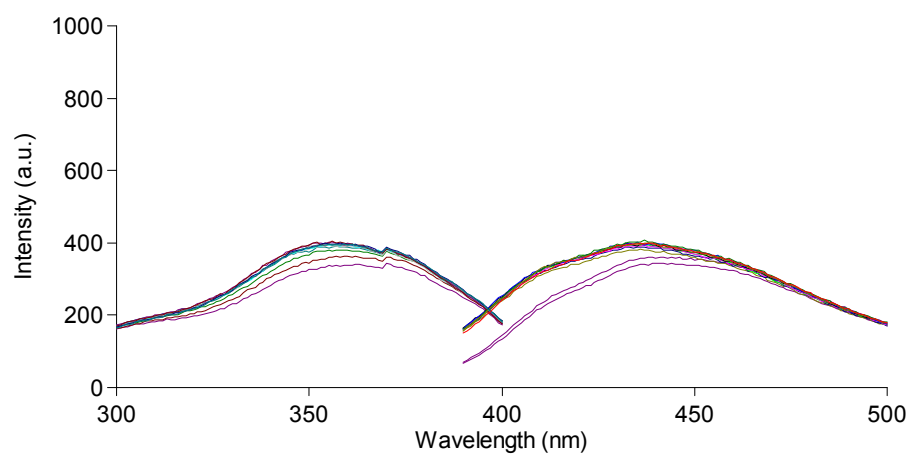



**13d** in the presence of  $\text{CuSO}_4$

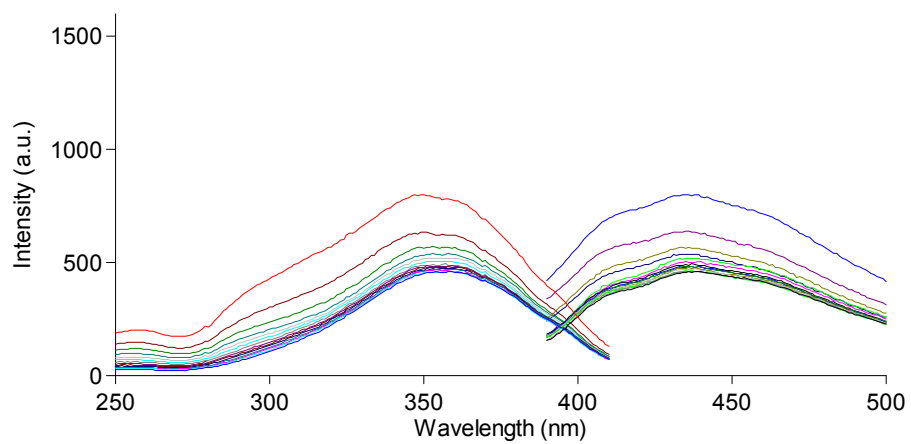

**13d** in the presence of  $\text{Y}(\text{NO}_3)_3$

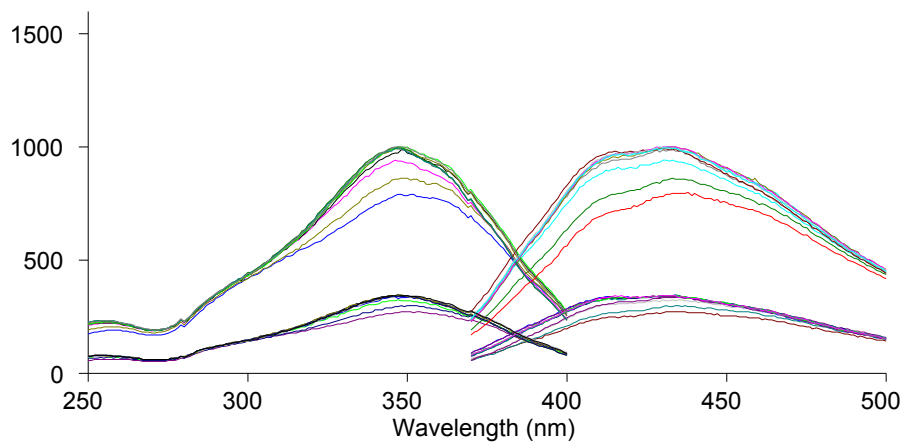

#### 4) Titration curves

##### Titration curves of ligands 6a-c and 8a-b with $Zn^{2+}$ .

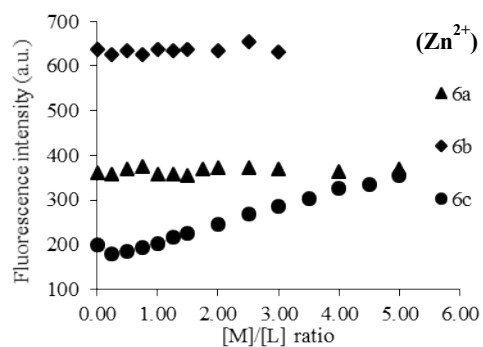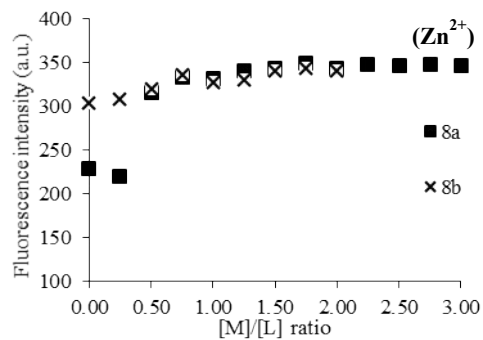

##### Titration curves of ligands 6a-c and 8a-b with $Cu^{2+}$ .

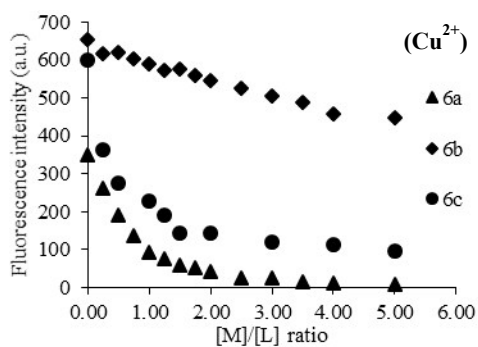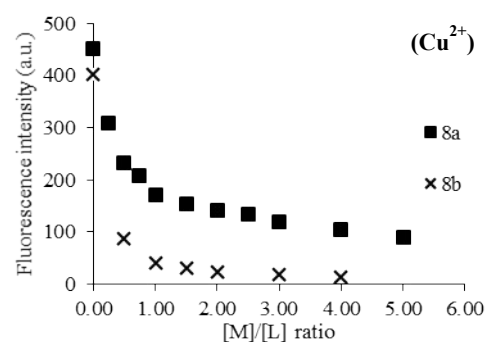

##### Titration curves of ligands 6a-c and 8a-b with $Y^{3+}$ .

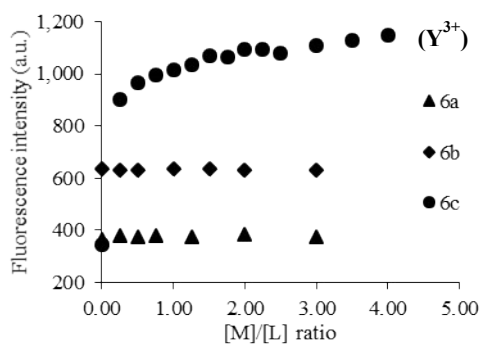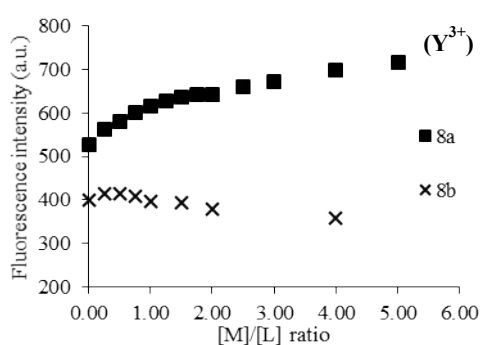

### Titration curves of ligands 11a-d and 13a-c with $Zn^{2+}$ .

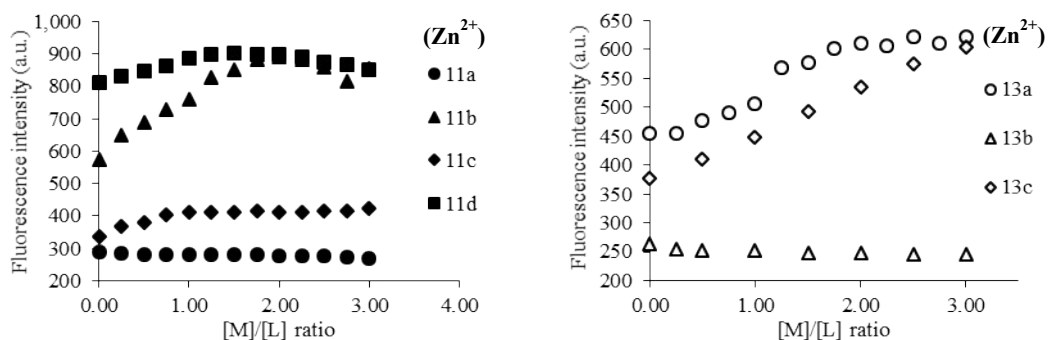

### Titration curves of ligands 11a-d and 13a-d with $Cu^{2+}$ .

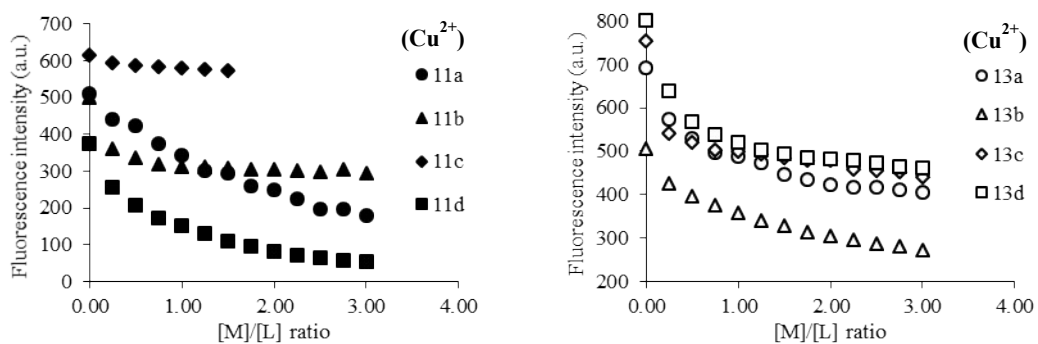

### Titration curves of ligands 11a-d and 13a-d with $Y^{3+}$ .

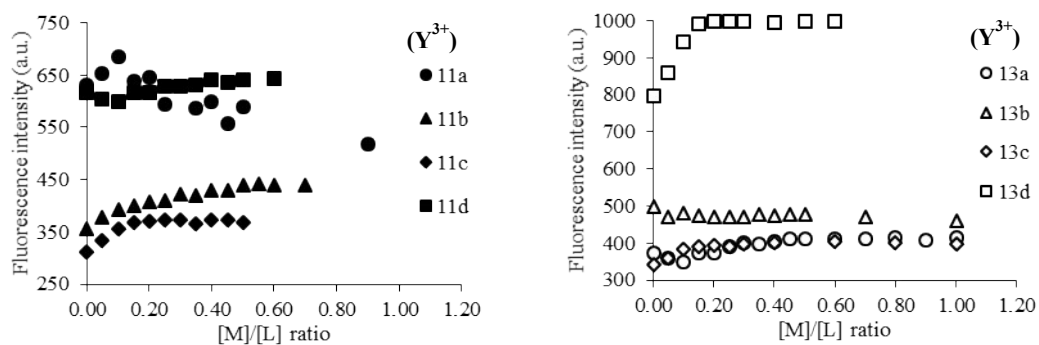

Supplement: c9nj02829c1.pdf [file c9nj02829c1.pdf]
